# Supplementary material
Source: PubMed Central journal article supplement (PMC9617661)
Supplement: mmc1.pdf [file mmc1.pdf]

# THE LANCET

## Public Health

### Supplementary appendix

This appendix formed part of the original submission and has been peer reviewed. We post it as supplied by the authors.

Supplement to: Cai W, Zhang C, Zhang S, et al. The 2022 China report of the *Lancet* Countdown on health and climate change: leveraging climate actions for healthy ageing. *Lancet Public Health* 2022; published online Oct 29. [https://doi.org/10.1016/S2468-2667\(22\)00224-9](https://doi.org/10.1016/S2468-2667(22)00224-9).

1 The 2022 Chinese Report of  
2 The Lancet Countdown on  
3 Health and Climate Change:  
4 leveraging climate actions for  
5 healthy ageing

6 Appendix

7  
8  
9  
10  
11  
12  
13  
14  
15  
16  
17

|    |                                                                                      |            |
|----|--------------------------------------------------------------------------------------|------------|
| 19 | <b><i>Section 1: Climate change impacts, exposures, and vulnerability</i></b> _____  | <b>1</b>   |
| 20 | <b>Indicator 1.1: Health and heat</b> _____                                          | <b>1</b>   |
| 21 | Indicator 1.1.1: Heatwave-related mortality _____                                    | 1          |
| 22 | Indicator 1.1.2 Change in labour capacity _____                                      | 3          |
| 23 | Indicator 1.1.3: Heat and physical activities _____                                  | 6          |
| 24 | Indicator 1.1.4: Health and exposure to warming _____                                | 9          |
| 25 | <b>Indicator 1.2: Health and extreme weather events</b> _____                        | <b>12</b>  |
| 26 | Indicator 1.2.1: Wildfires _____                                                     | 12         |
| 27 | Indicator 1.2.2: Extreme rainfall and drought _____                                  | 16         |
| 28 | <b>Indicator 1.3: Climate-sensitive infectious diseases</b> _____                    | <b>21</b>  |
| 29 | <b>Indicator 1.4: Population exposure to regional sea level rise</b> _____           | <b>29</b>  |
| 30 | <b><i>Section 2: Adaptation, planning, and resilience for health</i></b> _____       | <b>33</b>  |
| 31 | <b>Indicator 2.1: Adaptation planning and assessment</b> _____                       | <b>33</b>  |
| 32 | Indicator 2.1.1: National level adaptation planning and assessment _____             | 33         |
| 33 | Indicator 2.1.2 City-level climate change risk assessments _____                     | 49         |
| 34 | <b>Indicator 2.2: Adaptation delivery and implementation</b> _____                   | <b>51</b>  |
| 35 | Indicator 2.2.1: Detection, preparedness, and response to health emergencies _____   | 51         |
| 36 | Indicator 2.2.2: Air conditioning - benefits and harms _____                         | 60         |
| 37 | Indicator 2.2.3: Urban green space _____                                             | 62         |
| 38 | <b>Indicator 2.3: Climate information services for health</b> _____                  | <b>66</b>  |
| 39 | <b><i>Section 3: Mitigation actions and health co-benefits</i></b> _____             | <b>68</b>  |
| 40 | <b>Indicator 3.1: Energy system and health</b> _____                                 | <b>68</b>  |
| 41 | Indicator 3.1.1: Carbon intensity of the energy system _____                         | 68         |
| 42 | Indicator 3.1.2: Energy system and health - Coal phase-out _____                     | 69         |
| 43 | Indicator 3.1.3: Low-carbon emission electricity _____                               | 72         |
| 44 | <b>Indicator 3.2: Clean household energy</b> _____                                   | <b>78</b>  |
| 45 | <b>Indicator 3.3: Air pollution, energy, and transport</b> _____                     | <b>80</b>  |
| 46 | Indicator 3.3.1: Exposure to air pollution in cities _____                           | 80         |
| 47 | Indicator 3.3.2: Premature mortality from ambient air pollution by sector _____      | 82         |
| 48 | Indicator 3.3.3: Sustainable and healthy transportation _____                        | 85         |
| 49 | <b><i>Section 4: Economics and Finance</i></b> _____                                 | <b>88</b>  |
| 50 | Indicator 4.1.1: Economic costs of heatwave-related mortality _____                  | 88         |
| 51 | Indicator 4.1.2: Economic costs of heat-related labour productivity loss _____       | 90         |
| 52 | Indicator 4.1.3: Economic costs of air pollution-related premature deaths _____      | 97         |
| 53 | Indicator 4.1.4: Economic losses due to climate-related extreme events _____         | 100        |
| 54 | <b>Indicator 4.2: The economics of the transition to zero-carbon economics</b> _____ | <b>107</b> |
| 55 | Indicator 4.2.1: Investment in new coal and low-carbon energy _____                  | 107        |
| 56 | Indicator 4.2.2: Employment in low-carbon and high-carbon industries _____           | 111        |

|    |                                                                                          |            |
|----|------------------------------------------------------------------------------------------|------------|
| 57 | Indicator 4.2.3: Net value of fossil fuel subsidies and carbon prices _____              | 113        |
| 58 | <b><i>Section 5: Public and political engagement</i></b> _____                           | <b>117</b> |
| 59 | <b>Indicator 5.1: Media coverage of health and climate change</b> _____                  | <b>117</b> |
| 60 | Indicator 5.1.1: Social media _____                                                      | 117        |
| 61 | Indicator 5.1.2: Newspaper coverage of health and climate change in China _____          | 122        |
| 62 | <b>Indicator 5.2: Individual engagement in health and climate change</b> _____           | <b>127</b> |
| 63 | <b>Indicator 5.3: Coverage of health and climate change in scientific journals</b> _____ | <b>135</b> |
| 64 | <b>Indicator 5.4: Health and climate change in the Chinese government</b> _____          | <b>139</b> |
| 65 | <i>Additional information to Figure 2 in the main text</i> _____                         | <b>142</b> |
| 66 | <i>Additional information to Figure 3 in the main text</i> _____                         | <b>142</b> |
| 67 | <b><i>Reference</i></b> _____                                                            | <b>145</b> |
| 68 |                                                                                          |            |
| 69 |                                                                                          |            |
| 70 |                                                                                          |            |
| 71 |                                                                                          |            |
| 72 |                                                                                          |            |



73 **Section 1: Climate change impacts, exposures, and**  
74 **vulnerability**

75 **Indicator 1.1: Health and heat**

76 **Indicator 1.1.1: Heatwave-related mortality**

77 **Methods**

78 The heatwave event was defined as a period of three or more days where the daily maximum temperature  
79 was higher than the reference (92.5th percentile of daily maximum temperature between 1986 and 2005)  
80 at a given location, which was chosen among different heatwave definitions to best capture the health  
81 effects of heat events in China<sup>1,2</sup>. The days of heatwave were defined as the number of days within the  
82 heatwave event. The deaths attributable to heatwave (AN) are calculated. The method is as follows:

83 
$$AN_{y,p} = Pop_{y,p} \times Mort_{y,p} \times HW_{y,p} \times AF_{y,p}$$

84 Where  $Pop_{y,p}$  refers to the grid cell-level population size in a specific year.  $Mort_{y,p}$  is the baseline daily  
85 non-accidental mortality rate; Since the mortality rate from China Statistical Yearbook is an annual  
86 statistic and mortality has seasonal patterns with a marked excess of deaths in winter<sup>3</sup>, the mortality rate  
87 is multiplied by monthly mortality proportion and then divided by days per month as a pre-process.  $HW_{y,p}$   
88  $p$  is the grid cell-level heatwave days in a specific year.  $AF_{y,p}$  is the attributable fraction (AF), which is  
89 calculated as:

90 
$$AF = (RR - 1)/RR$$

91 Where relative risks (RR) represent the increase in the risk of mortality resulting from heatwave  
92 compared with non-heatwave, and RR here refers to the gridded RR by matching climate division-  
93 specific RR with the grid. The exposure-response relationship between heatwave and mortality in  
94 different provinces (autonomous regions) is represented by the related capital cities in mainland China<sup>2</sup>,  
95 and the relationship is assumed to be consistent during the study period. Then gridded annual deaths  
96 number of heatwave from 2000 to 2021 could be calculated by the above formulas, and summed to gain  
97 provincial and national AN. We limit our research on the warm season since a previous study has shown  
98 that approximately 90% of deaths attributable to heatwave occurred during May-September<sup>4</sup>.

99

100 Besides, we calculated the mortality for different age groups. The method is similar to AN for the total  
101 population above, except for the age-specific RR and population of a specific age group are used to  
102 replace the whole-age RR and whole population for calculation.

103 The method for subgroup analysis is as follows:

104 
$$AN_{y,p} = Pop_{y,p} \times Mort_{y,p} \times AgeP_{y,p,a} \times HW_{y,p} \times AF_{y,p,a} \quad (a=65+ \text{ or } 0-64)$$

105 And the  $AF_{y,p,a}$  is the age-specific AF.  $AgeP_{y,p,a}$  is the proportion of age-specific population.

106 **Data**

- 107 1. Original RR values are derived from Yang et al<sup>2</sup>. Based on the general trend that risks are  
108 homogeneous in the same climate region and higher in the north of China than that in the south<sup>5</sup>,  
109 this study combines risks through meta-analysis according to the climate zones based on the basic  
110 risk distribution pattern.
- 111 2. Non-accidental mortality rates and monthly mortality proportion (*Mort<sub>y,p</sub>*), as well as population  
112 structure data at province levels are derived from China Statistical Yearbook.
- 113 3. Gridded climate data was from the European Centre for Medium-Range Weather Forecasts  
114 (ECMWF), ERA5 project.<sup>6</sup>
- 115 4. Population data was from the Chambers (2020) hybrid gridded demographic data for the world.<sup>7</sup>
- 116 5. We choose 1986-2005 as temperature reference period for heatwave threshold to keep consistent  
117 with the Global report, which resulted in about 5000 attributable deaths per year since the  
118 temperature is lower in 1986-2005 than 2007-2013, which is the former reference period we took  
119 to keep consistent with the exposure-response functions derived from this period.

## 120 **Caveats**

121 The main caveats of this indicator are the limited number of exposure-response functions for such a big  
122 country like China and that the effects of heatwave on mortality were assumed to be constant without  
123 considering population adaptation.

124

125 The selection of the most appropriate heatwave definition remains controversial<sup>8</sup>. We chose heatwave  
126 definitions among different definitions to best capture the health effects of heat events in China<sup>1,2</sup>. The  
127 detailed chosen progress could be found in Lancet Countdown 2020<sup>9</sup>.

## 128 **Future Form of Indicator**

129 One possible improvement of this indicator would be to use more localized city-level exposure-response  
130 function parameters within each province. And try to take the population adaptation over time into  
131 consideration. Another improvement could be to calculate the mortality for different diseases or gender.

132

## 133 **Additional Information**

134 In 2021, the death attributable to heatwave for elderly people older than 65 years old is 18,761,  
135 which is three and four times for the people younger than 15 years old and working people between  
136 15 and 64 years old, respectively.

137

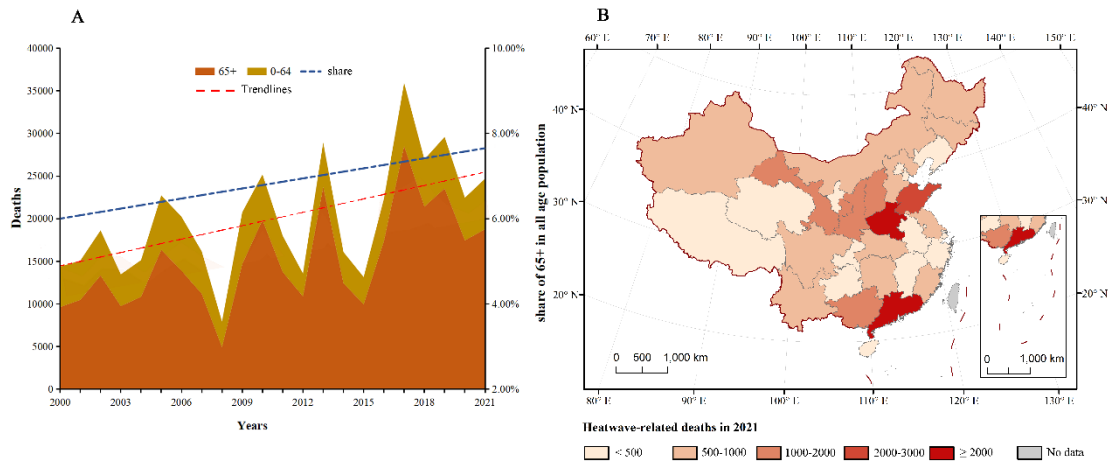

138  
 139  
 140  
 141  
 142  
 143  
 144

**Figure 1: Heatwave-related mortality in China. (A) Trend of heatwave-related mortality in 2000–2021. (B) Heatwave-related mortality by province in 2021.**

The red dashed line shows the linear trend with the equation: heatwave-related deaths = 397\*year – 785447, P<0.05. The blue dashed line shows the share of people elder than 65 years in the total population.

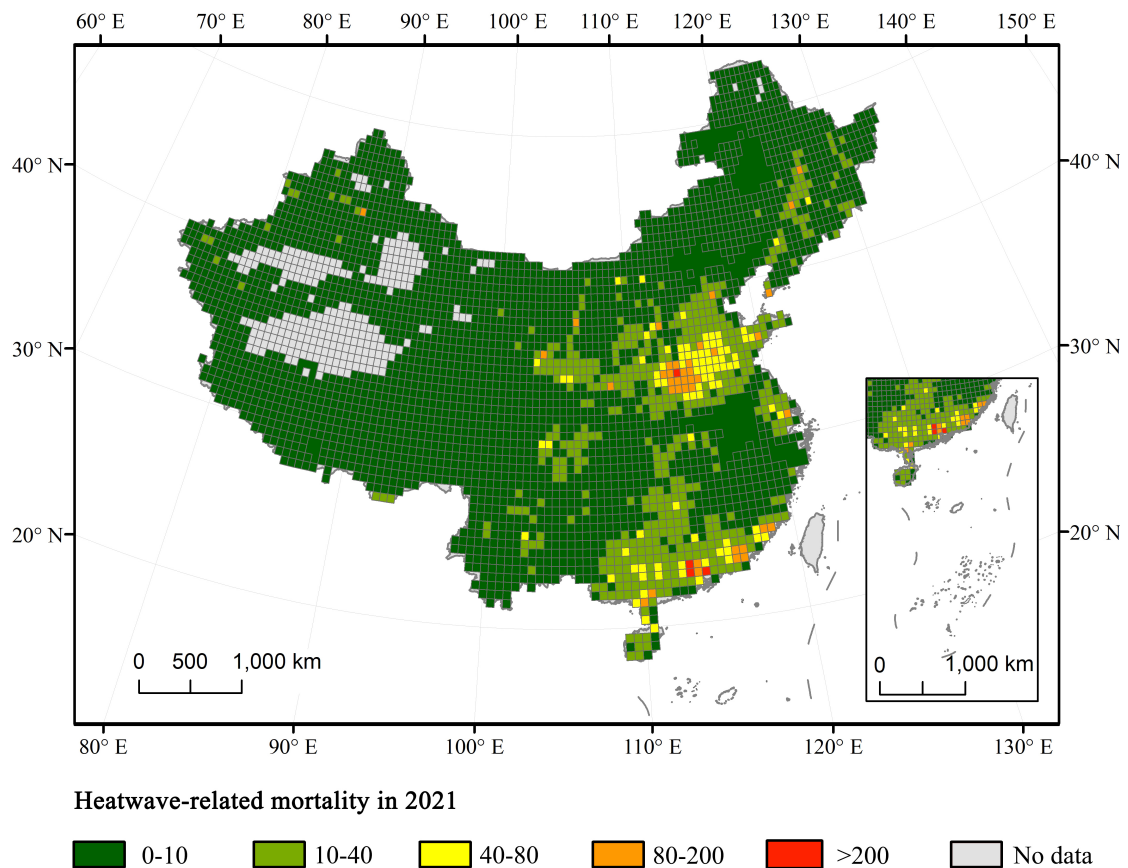

145  
 146  
 147  
 148  
 149

**Figure 2: Heatwave-related mortality in China on grid level.**

**Indicator 1.1.2 Change in labour capacity**

150 **Methods**

151 This indicator has been improved from the 2021 China Lancet Countdown report to show changes  
152 of work hours lost (WHL) in different industries compared with the baseline period (1986-2005).

153 Firstly, wet bulb globe temperature was estimated based on gridded (0.5° \* 0.5°) climate data. We  
154 calculated the hourly WBGT in the shade (WBGT\_shade) using temperature and dew point  
155 temperature, and calculated the hourly WBGT in the sun (WBGT\_sun) using temperature, dew point  
156 temperature, solar radiation and wind speed. The detailed iteration calculation method is described in  
157 Kjellstrom et al.<sup>10</sup>

158 Secondly, we estimated the grid employment population by collecting employment rates for  
159 different sectors in each province from the national and provincial yearbooks. Then we multiplied the  
160 gridded population by the provincial employment rates to estimate the gridded working population in  
161 each sector during 1986-2021.

162 Thirdly, the fraction of work hours lost (WHL) in each industry was estimated based on the loss  
163 function between WBGT and WHL.<sup>11</sup> The loss function was shown as:

164 
$$loss\ fraction = \frac{1}{2} \left( 1 + \text{ERF} \left( \frac{\text{WBGT}_{\text{hour}} - \text{Prod}_{\text{mean}}}{\text{Prod}_{\text{sd}} * \sqrt{2}} \right) \right)$$

165  $\text{WBGT}_{\text{hour}}$  is the hourly WBGT\_shade or WBGT\_sun estimated in the first step.  $\text{Prod}_{\text{mean}}$  and  
166  $\text{Prod}_{\text{sd}}$  are the fixed parameters for laborers working with different activity levels (**Table 1**). In this  
167 study, labour was divided into engaging in agriculture, construction, manufacturing and service. We  
168 assumed labor in agriculture and construction working at a metabolic rate of 400W, manufacturing at  
169 300W and service at 200W. As the agriculture and construction sectors require mainly outdoor work,  
170 while service and manufacturing require mainly indoor work. Therefore, we used the WBGT\_sun to  
171 calculate the hourly work time loss in agriculture and construction, and WBGT\_shade in manufacturing  
172 and service.

173 Finally, we assumed a laborer works 8 hours a day (typically from 8am to 5pm with an hour break  
174 from 12am to 1pm for Chinese workers), and 8 hours is the legal working time stipulated by the Labor  
175 Law of China. We counted the girded number of annual losses by summing the hourly work time loss in  
176 the second step, and then multiply by the girded annual number of workers to obtain the WHL in different  
177 sectors. The total WHL was estimated by summing WHL in all four industries.

178

179 **Table 1: Input values for labor loss fraction**

| Metabolic rate | $\text{Prod}_{\text{mean}}$ | $\text{Prod}_{\text{sd}}$ |
|----------------|-----------------------------|---------------------------|
| 200W           | 35.53                       | 3.94                      |
| 300W           | 33.49                       | 3.94                      |
| 400W           | 32.47                       | 4.16                      |

180 W: watts

181 **Data**

182 Gridded climate data was from the European Centre for Medium-Range Weather Forecasts (ECMWF),

183 ERA5 project.<sup>6</sup> Population data was from the hybrid gridded demographic data for the world. <sup>7</sup> Data on  
 184 the percentage of people working in each industry was from national and provincial Statistical Yearbook  
 185 of China.

186 **Caveats**

187 Due to lacking official employment rates of the elderly, we did not quantitatively assess the productivity  
 188 losses among the elderly.

189 **Future form of indicator**

190 This indicator will be updated to project WHL in the future periods, for instance in 2060, the time point  
 191 of achieving the carbon neutrality goal in China. In addition, considering workers usually work overtime  
 192 to get more pay in China, we plan to add more analysis on the assumptions of different daily working  
 193 hours (e.g., 9 or 10 hours a day).

194 **Additional Information**

195 **Table 2: The total WHL and average WHL for each person in four industries from 2000 to 2021 in**  
 196 **China (Unit in total loss: billion hours; Unit in each person's loss: hours)**

| Year | agriculture |             | construction |             | manufacturing |             | Service |             |
|------|-------------|-------------|--------------|-------------|---------------|-------------|---------|-------------|
|      | Total       | Each person | Total        | Each person | Total         | Each person | Total   | Each person |
| 2000 | 29.5        | 84.7        | 1.8          | 89.2        | 1.4           | 11.6        | 0.1     | 0.4         |
| 2001 | 27.8        | 79.5        | 1.6          | 81.7        | 1.5           | 11.9        | 0.1     | 0.7         |
| 2002 | 29.8        | 85.3        | 1.9          | 89.1        | 1.6           | 12.5        | 0.2     | 1.3         |
| 2003 | 29.2        | 84.8        | 2.1          | 93.4        | 2.3           | 18.4        | 0.4     | 2.3         |
| 2004 | 26.1        | 77.4        | 2.1          | 86.4        | 1.7           | 12.3        | 0.1     | 0.5         |
| 2005 | 27.8        | 84.4        | 2.4          | 93.4        | 1.8           | 12.6        | 0.1     | 0.4         |
| 2006 | 29.0        | 89.7        | 2.8          | 103.3       | 2.1           | 14.4        | 0.1     | 0.6         |
| 2007 | 25.9        | 81.4        | 2.8          | 98.5        | 2.2           | 13.8        | 0.1     | 0.6         |
| 2008 | 23.5        | 75.5        | 2.9          | 92.7        | 1.6           | 9.4         | 0.0     | 0.2         |
| 2009 | 24.6        | 80.1        | 3.1          | 92.7        | 2.0           | 11.7        | 0.1     | 0.3         |
| 2010 | 27.4        | 90.2        | 4.0          | 108.3       | 3.0           | 17          | 0.4     | 1.4         |
| 2011 | 22.1        | 74.7        | 3.7          | 90.3        | 1.7           | 9.8         | 0.1     | 0.3         |
| 2012 | 22.2        | 75.7        | 3.5          | 90.1        | 2.1           | 11          | 0.1     | 0.2         |
| 2013 | 27.4        | 95.4        | 5.2          | 122.5       | 3.7           | 19.7        | 0.3     | 1           |
| 2014 | 21.6        | 76.6        | 4.0          | 88.2        | 2.4           | 12.6        | 0.2     | 0.6         |
| 2015 | 19.4        | 70.2        | 3.8          | 83.6        | 2.2           | 11.3        | 0.1     | 0.3         |
| 2016 | 27.3        | 100.4       | 6.5          | 128.9       | 4.5           | 23.8        | 0.8     | 2.6         |
| 2017 | 27.1        | 101.4       | 6.8          | 135         | 4.6           | 25.2        | 0.7     | 2.3         |
| 2018 | 27.5        | 105.9       | 7.5          | 138.5       | 4.1           | 23          | 0.3     | 1.1         |
| 2019 | 23.7        | 93.2        | 6.4          | 118.1       | 3.6           | 20.3        | 0.6     | 1.7         |
| 2020 | 21.7        | 87.2        | 6.3          | 117.3       | 3.2           | 18.2        | 0.3     | 0.9         |
| 2021 | 23.2        | 93.2        | 6.4          | 119.6       | 3.1           | 18.1        | 0.2     | 0.7         |

197

198

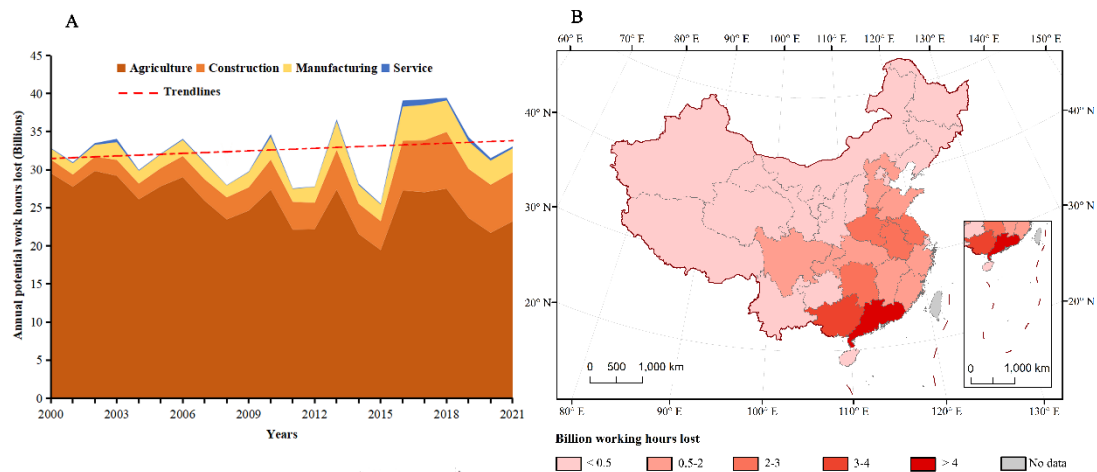

199

200

201

**Figure 3: Heat-related work hours lost in China. (A) Annual potential work hours lost due to heat in each industry from 2000 to 2021. (B) Total work hours lost in different provinces in 2021.**

202

### **Indicator 1.1.3: Heat and physical activities**

203

#### **Methods**

204

This indicator was newly added in the 2022 report with similar method to global report 2022. Firstly, China's gridded hourly temperature and relative humidity were used to calculate Heat Index (HI) according to the equation derived from Steadman's temperature-humidity scale.<sup>12</sup> For each raster the number of hours in which the HI was above 33 °C were cumulatively calculated in very single year from 1986 to 2021.

209

210

Secondly, Heat Index is a world-widely used indicator for the assessment of environment heat stress which can be also considered as apparent temperature or the temperature the body "feels" according to Steadman. An HI value of 33°C is the threshold cited by Heat Stroke Expert Group of the Whole Army, Expert Consensus Group on Diagnosis and Treatment of Heat Stroke in China<sup>13</sup> and Sports Medicine Australia(SMA),<sup>14</sup> above which the risk of heat illness increases and extreme caution during the outdoor physical activity should be taken into account. Besides, like another heat stress indicator WBGT, the HI indicator was originally used in military training to prevent extreme heat illness like sunstroke and heat stroke, but now it has been applicable to general populations, not just to the elite athletes or the soldiers, which indicates how the ambient heat affects on our body. Moreover, HI is also widely used in Chinese weather forecasting, making it easily to be understood and acknowledged by public.

220

221

Thirdly, the calculation of total potential population weighted hours lost in each raster was performed by multiplying the numbers of hours lost to the corresponding population. The population weighted hours lost in each raster were summed up to province or region scale in China, and then divided by the corresponding total population and then divided by 365 to obtain the number of physical activity hours lost per person per day in each year.

226

227

#### **Data**

- 228 1. Hersbach, H., Bell, B., Berrisford, P., Biavati, G., Horányi, A., Muñoz Sabater, J., Nicolas, J., Peubey,  
229 C., Radu, R., Rozum, I., Schepers, D., Simmons, A., Soci, C., Dee, D., Thépaut, J-N. (2018): ERA5  
230 hourly data on single levels from 1979 to present. Copernicus Climate Change Service (C3S)  
231 Climate Data Store (CDS). (Accessed 2022.03.25), 10.24381/cds.adbb2d47.
- 232 2. Hybrid gridded demographic data for China, 1979-2100. An overview of this dataset can be found  
233 at <https://zenodo.org/record/4554571#.Y1Qf0JFBxyw>. (Accessed 2022.03.25),  
234 10.5281/zenodo.4554571.

235

### 236 **Caveats**

237 The Heat Index was widely used by sport associations and authorities, however, whether the threshold is  
238 appropriate for different age population groups and different sport activities in China is still need to be  
239 further tested. In addition, it's acknowledged physical activity and exercise ability are affected by factors  
240 such as age, clothing, wind and physiology, not just by ambient temperature and humidity, and these  
241 inter-individual factors needs a more robust index.

242

### 243 **Future forms of the indicator**

244 The exploration to different heat stress index and its thresholds will allow better reflection to true outdoor  
245 physical activity hours lost on several target population groups. And the report in next year will be  
246 updated when the 2021 gridded population data are available. Considering the effects of COVID-19  
247 pandemic, outdoor physical activities can be encouraged to increase, therefore the indicator should be  
248 considered not only in the shade but also in the sun. We plan to conduct a national willingness-to-pay  
249 (WTP) survey to derive the value of a statistical life (VSL) on the topic of physical activity habits and  
250 preferences, in order to calculate the economic loss related to AHL.

251

### 252 **Additional information**

253 Since the physical activity hours lost per person per day in the main report is calculated in Heat Index(the  
254 trend is as followed in *Figure 4*), it is can be also obtained by the indicator WBGT(*Figure 5*, *Figure 6*),  
255 the function and threshold 26°C used here is as same as the 2022 global report of the Lancet Countdown,<sup>10</sup>  
256 but weighted with different gridded population database. There is also an increasing trend of WBGT and  
257 thus potential safe activity hours lost has occurred across China, the annual average WBGT in 2021  
258 increased by 16.9% compared to the baseline years (1986-2005), resulting in a 48.5% increase in physical  
259 activity hours lost (AHL) per person. In 2021, the national average physical activity hours lost was  
260 estimated to be 2.46 hours, and people in South Central China also has been affected the most, with  
261 estimated 4.76 hours lost per day on average and a highest average growth rate during 2000-2021(2.02%  
262 per year).

263

264

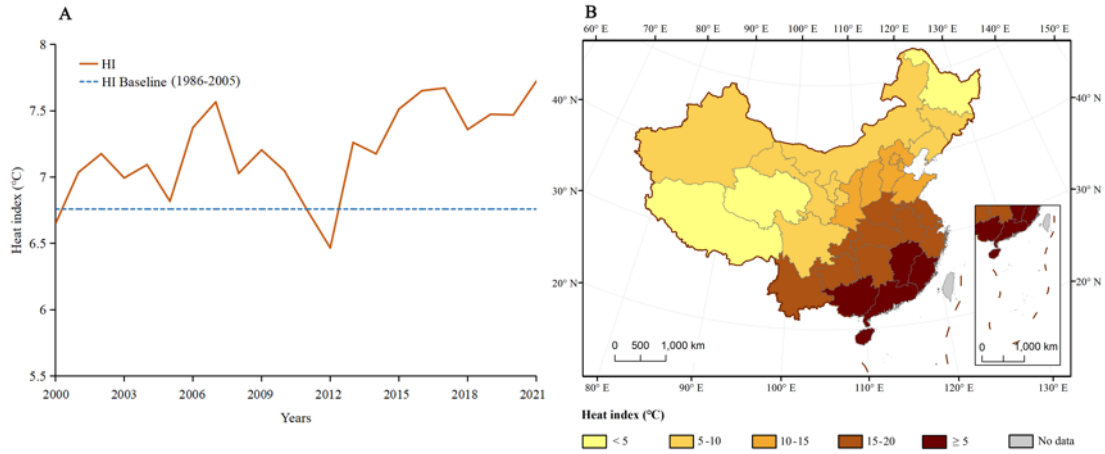

265  
266  
267  
268  
269  
270  
271

**Figure 4 The trend of indicator Heat Index in China.**

(A) The trend of annual average Heat Index in China from 2000 to 2021, with the horizontal dashed line shows the mean of the 1986–2005 baseline period.

(B) Annual average Heat Index in different provinces in 2021. Undefined-No Data.

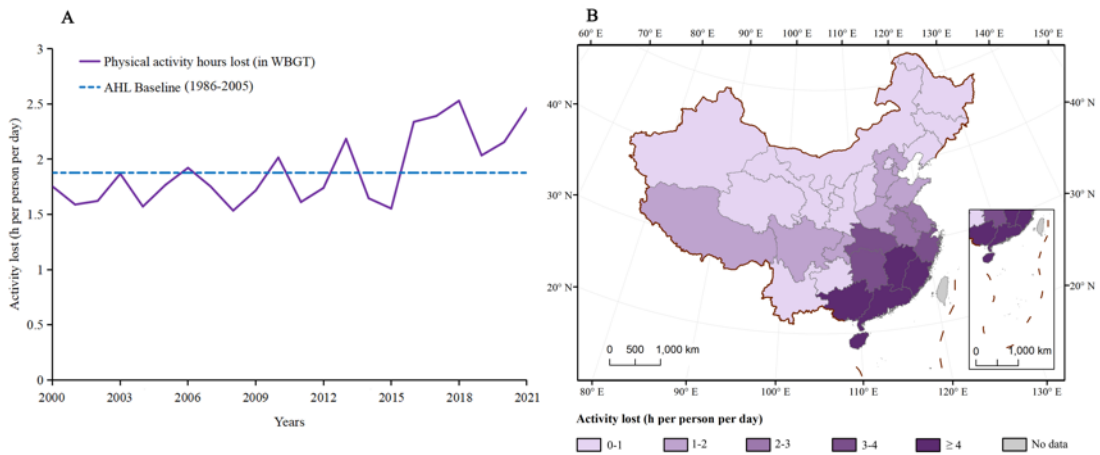

272  
273  
274  
275  
276  
277  
278  
279

**Figure 5 Heat-related Physical activity hours lost in China (in WBGT).**

(A) The trend of annual potential AHL per person per day in China from 2000 to 2021, with the horizontal dashed line shows the mean of the 1986–2005 baseline period.

(B) Potential AHL per person per day in different provinces in 2021. AHL(WBGT)- physical activity hours lost in WBGT, Undefined-No Data.



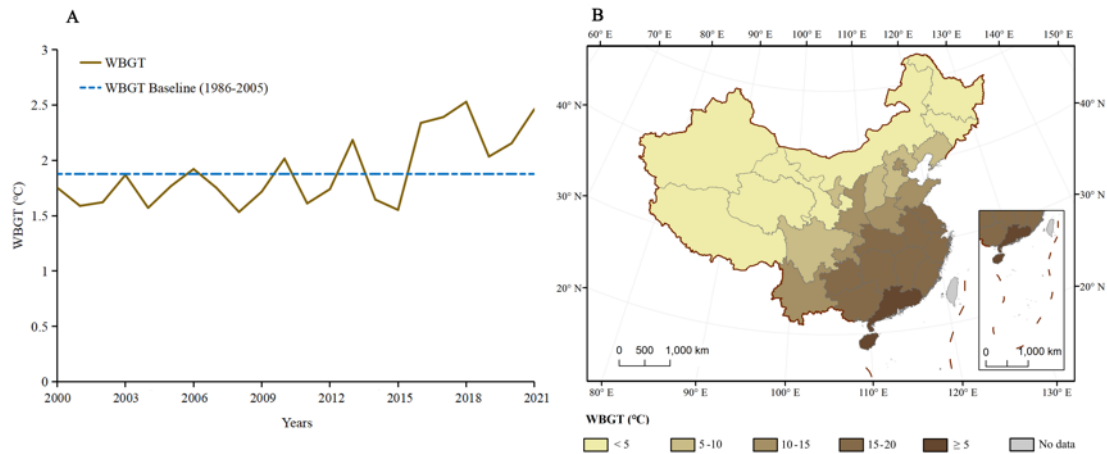

280

281 **Figure 6 The trend of indicator WBGT in China.**

282 (A) The trend of annual average WBGT in China from 2000 to 2021, with the horizontal dashed line  
 283 shows the mean of the 1986–2005 baseline period.

284 (B) Annual average WBGT in different provinces in 2021. Undefined-No Data.

285

286 **Indicator 1.1.4: Health and exposure to warming**

287 **Methods**

288 This indicator remains the same to the methodology described in the 2021 global Lancet Countdown  
 289 report and 2021 China Lancet Countdown report. Monthly averaged summer temperature (June, July and  
 290 August) was obtained from the ERA5 reanalysis data set and population count data from a hybrid gridded  
 291 demographic data. Both are gridded data with horizontal grid of 0.5°. Population-weighted temperature  
 292 and area-weighted temperature were calculated every year from 1986 to 2021 for every province and the  
 293 entire country. Changes in population-weighted and area-weighted temperatures were calculated every  
 294 year from 2000 to 2021 with 1986-2005 as the baseline. Area-weighted temperature was calculated by  
 295 averaging temperature records at every grid inside a province/for the entire country. Population-weighted  
 296 temperature was calculated in a similar method with weights proportional to population count.

297 **Data**

298 1. Climate data was taken from European Centre for Medium-Range Weather Forecasts (ECMWF),  
 299 ERA5 project.<sup>6</sup>

300 2. Population data is from a hybrid gridded demographic data for the world, created by Chambers  
 301 (2020).<sup>7</sup>

302 3. Age structure data for China is from Chen et al's paper (2020) <sup>15</sup>.

303 **Caveats**

304 The horizontal resolution of temperature data is too coarse to reflect warming trend at local level. The  
305 population figures for 2021 are not based on the real situation, but are calculated based on the spatial  
306 distribution and the pattern of change of the population in previous years, and cannot reflect the real  
307 population situation.

### 308 **Future Form of Indicator**

309 Future version may consider using localized reanalysis data set, instead of the global reanalysis data set.

### 310 **Additional Information**

311 The country-wide population-weighted temperature rose by 0.64°C in 2021 compared with the 1986-  
312 2005 baseline, with a slight increase compared to 2020, but still lower than 2016-2019 (**Figure 7 up**).  
313 The increase of population weighted temperature in aged group is lower than that in the 0-64 age group.  
314 Actually, the population weighted temperature in aged group was higher in the baseline period, but as  
315 the proportion of older people increases, the gap between the two groups is getting smaller (**Figure 7**  
316 **bottom**). Province-level changes in annual average population-weighted temperature in 2021 relative to  
317 the 1986-2005 average are presented in **Figure 8**. Similar with the spatial distribution in 2020, regions  
318 with profound warming were in South of the Yangtze River and the Middle Regions, such as Jiangxi,  
319 Hunan, Fujian, Guizhou, Ningxia, Xinjiang Gansu and Qinghai Provinces.

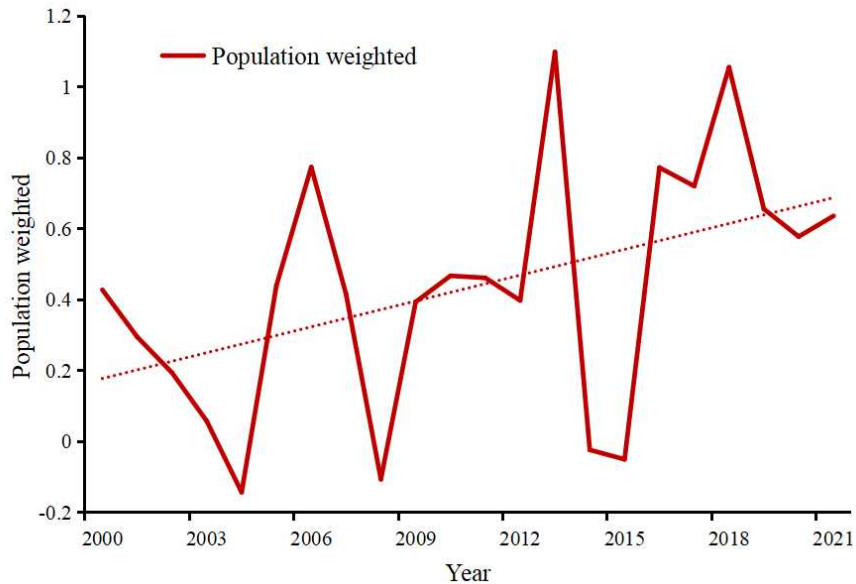

320

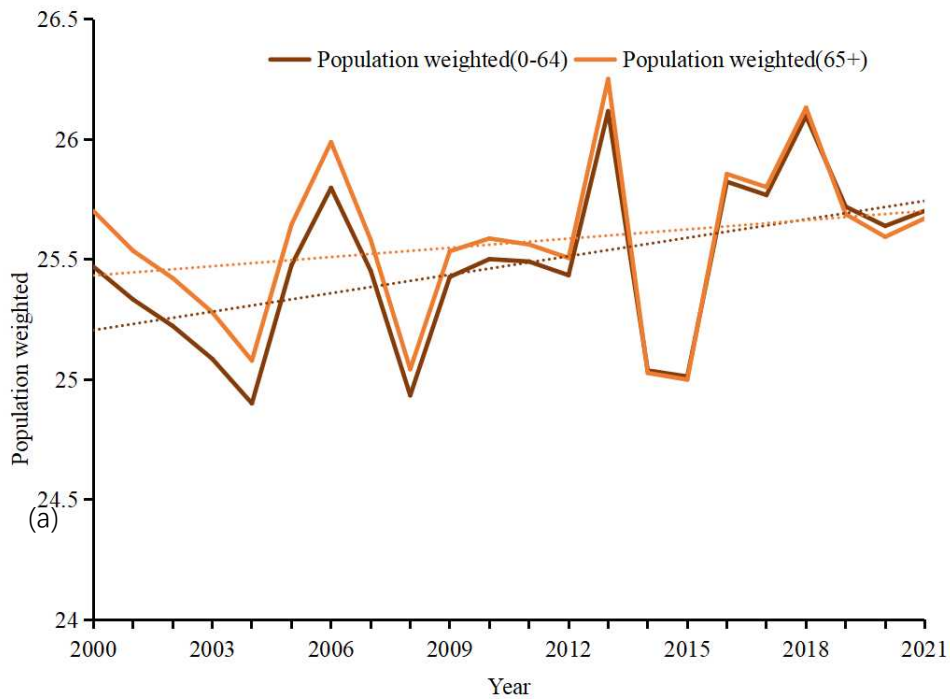

321

322 **Figure 7** Mean summer warming relative to the 1986–2005 average in China (up); (b) Mean summer  
 323 population-weighted exposure for different age groups in China (bottom).

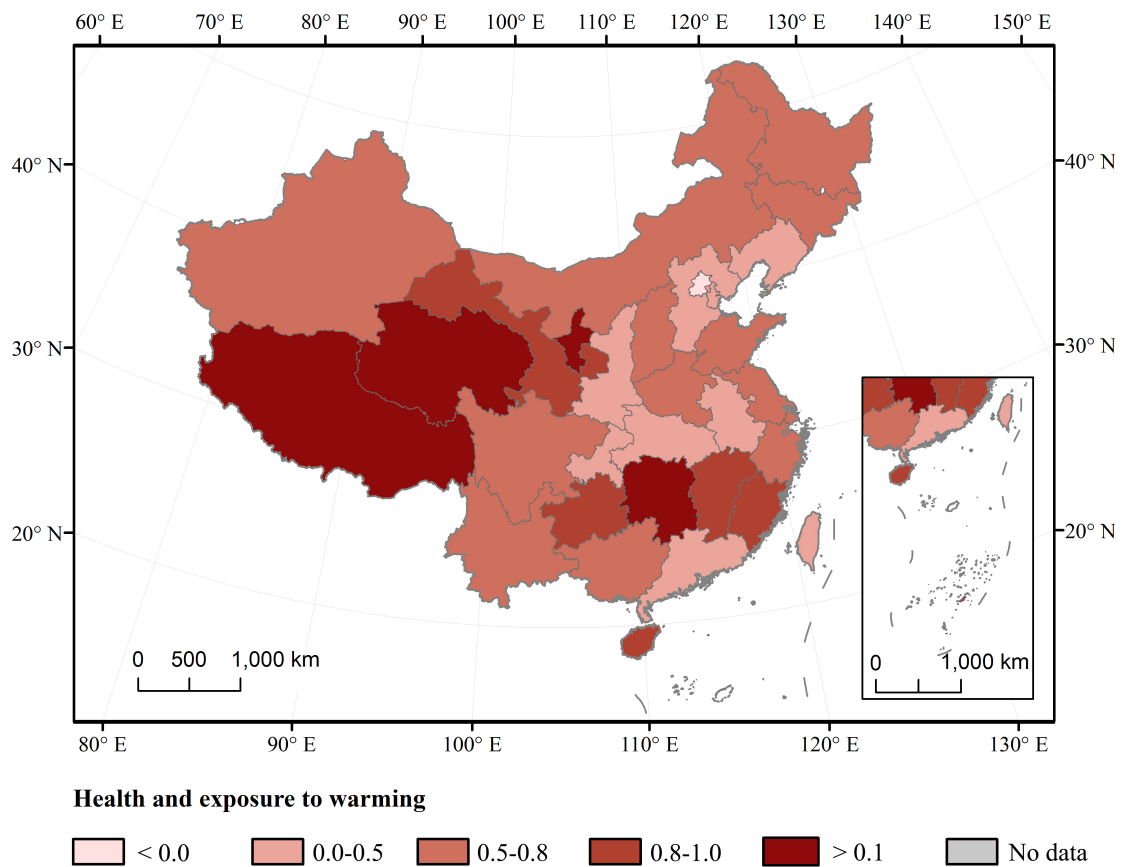

324

325 **Figure 8** Change in population-weighted summer temperature in 2020, relative to the 1986-2005

326 average

327

## 328 **Indicator 1.2: Health and extreme weather events**

### 329 **Indicator 1.2.1: Wildfires**

#### 330 **Methods**

331 This indicator has been improved from the 2021 China Lancet Countdown report to assess the impacts  
332 of wildfires on health by adding the analysis for people older than 65 years. Besides, a sensitivity  
333 analysis on spatial resolution was also included.

334 China's population<sup>11</sup> with a spatial resolution of 0.25° for each year from 2001 to 2020 was used in the  
335 study, which includes people older than 65 years. The Global Artificial Impervious Areas (GAIA)  
336 data<sup>16</sup>, which track the development of impervious areas from 1985-2018 using the full archive of 30-m  
337 resolution Landsat images, are reclassified to generate a mask of wildfire surface (impervious area  
338 excluded) for population. Additionally, since only the artificial impervious areas are used as the land  
339 cover mask for urban areas, the estimated results include crop fires.

340 The change in model-based risks is represented as the change in the average annual number of days that  
341 people are exposed to high fire danger. The detailed method is identical to the 2021 global Lancet  
342 Countdown report<sup>11</sup>. Provided by ECMWF ERA5 atmospheric reanalysis, the model-based risks identify  
343 meteorological conditions that would cause flames to spread out of control, which is classified into 6  
344 classes based on the numerical value: very low, low, medium, high, very high and extreme. The indicator  
345 was calculated by:

$$346 \quad RPD_y = Pop_y \times \sum FR_{d,pixel}$$

347 where  $RPD_y$  refers to yearly person-days exposed to high fire risk ( $FDI \geq 5$ ) in a specified year  $y$ , and  
348  $Pop_y$  refers to the population from gridded population data in year  $y$ .  $FR_{d,pixel}$  refers to a high fire risk  
349 count located within a population data  $pixel$  on a unique day  $d$  of year  $y$ . Fire risk pixels were aggregated  
350 yearly from 2001 to 2020 and spatially joined with global population data on 0.25° grids.

351 Satellite-observed exposure is represented in terms of the average annual number of days people were  
352 exposed to active fire. The combustion NASA Near Real-Time MODIS Active Fire Detections Products  
353 (MCD14DL)<sup>17</sup> were used as fire point data. The indicator was calculated by:

$$354 \quad CPD_y = Pop_y \times \sum FP_{d,pixel}$$

355

356 where  $CPD_y$  refers to person-days exposed to wildfire in a specified year  $y$ , and  $Pop_y$  refers to the  
357 population from gridded population data in a specified year  $y$ .  $FP_{d,pixel}$  refers to a fire point count  
358 located within a population data pixel on a unique day  $d$  of year  $y$ . Active fire pixels were aggregated  
359 yearly from 2001 to 2020 and spatially joined with global population data on 0.25° grids.

360

361 **Data**

- 362 1. Fire danger indices (FDI) data from Copernicus Emergency Management Service for the European  
363 Forest Fire Information System (EFFIS).<sup>18</sup>
- 364 2. NASA Near Real-Time MODIS Active Fire Detections Products (MCD14DL) from 2001 to 2019  
365 were used as fire point data, which contain both Terra (from November 2000) and Aqua (from July  
366 2002) pixels in the same annual file.<sup>17</sup>
- 367 3. Population data from Hybrid gridded demographic data for China, 1979-2100<sup>11</sup>.
- 368 4. Annual maps of global artificial impervious area (GAIA) between 1985 and 2018 as an urban-area  
369 population mask.<sup>16</sup>
- 370 5. China boundary data, in the CGCS\_2000 geographic coordinate system, from the National  
371 Geomatics Center of China (<http://www.ngcc.cn/ngcc/>).

372 **Caveats**

373 To capture the wildfire influences on people older than 65 years, the population used for this year report  
374 has a 0.25° spatial resolution that is coarser than that used in the 2021 report. This change results in an  
375 increase in the wildfire exposure assessment as the assumed area of influence of the active fire changes  
376 from a 0.5' x 0.5' grid population to a 0.25° x 0.25° grid population. Additionally, the population and  
377 artificial impervious areas in 2021 are the same as those in 2020, which leads to bias in the results.

378 Due to limited observational capabilities, this indicator does not explicitly quantify and model human  
379 exposure to wildfire smoke, which is associated with respiratory morbidity and with growing evidence  
380 supporting an association with all-cause mortality.<sup>18</sup>

381 Additionally, FDI data cannot capture all the changes in the summer monsoon and fire season  
382 temperature in China under the context of climate change.

383

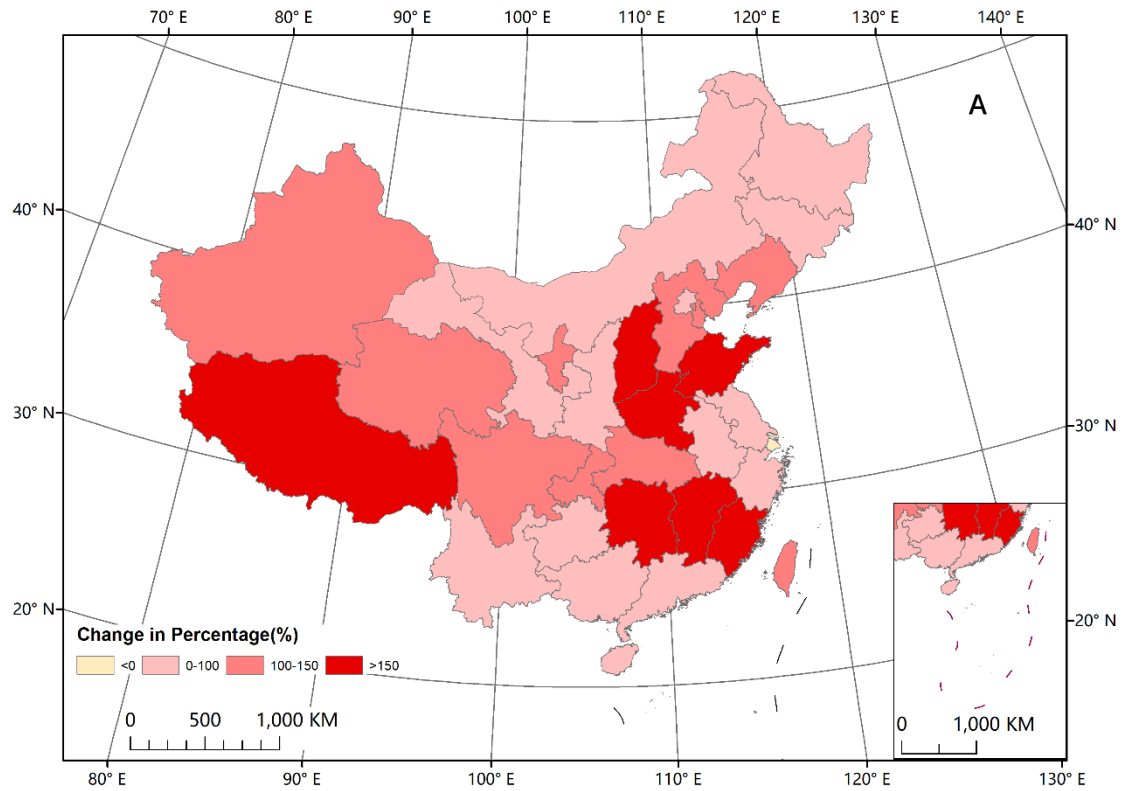

384  
385

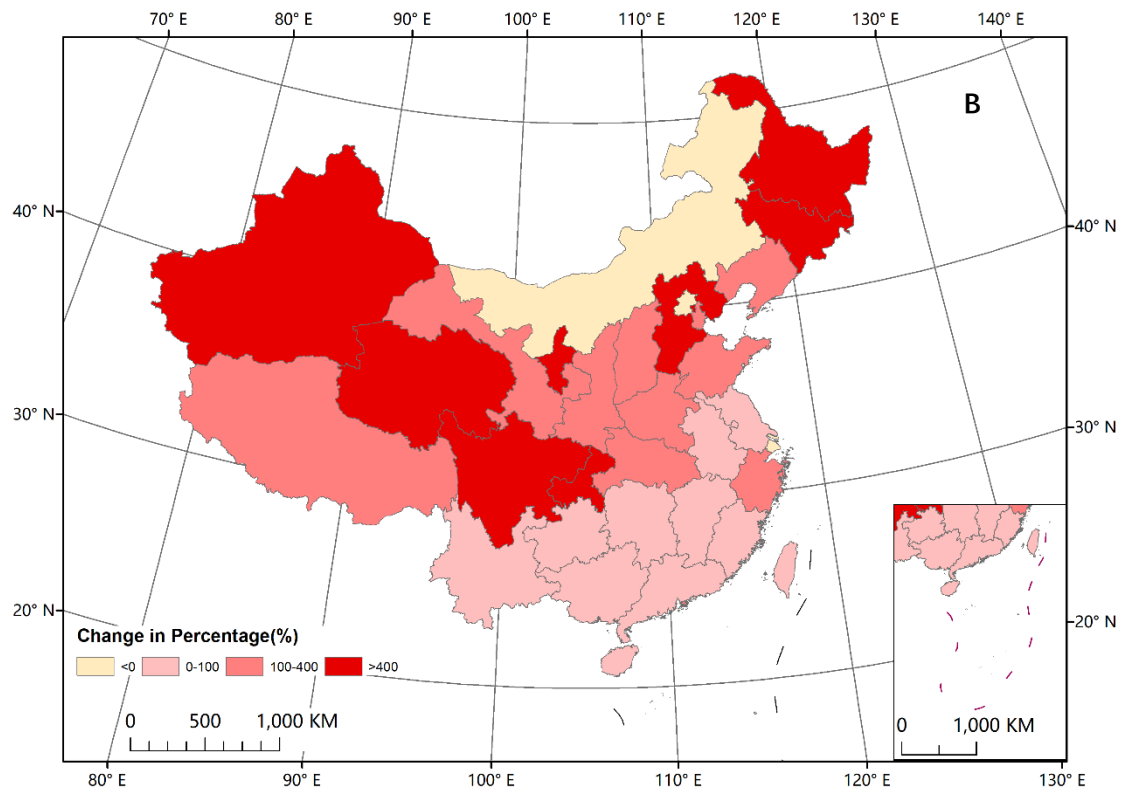

386  
387

388 **Figure 9:** Change in model-based risks (A) and satellite-observed (B) exposure for people older than  
389 65 years to wildfires across China from 2001-2005 to 2016-2020.

390

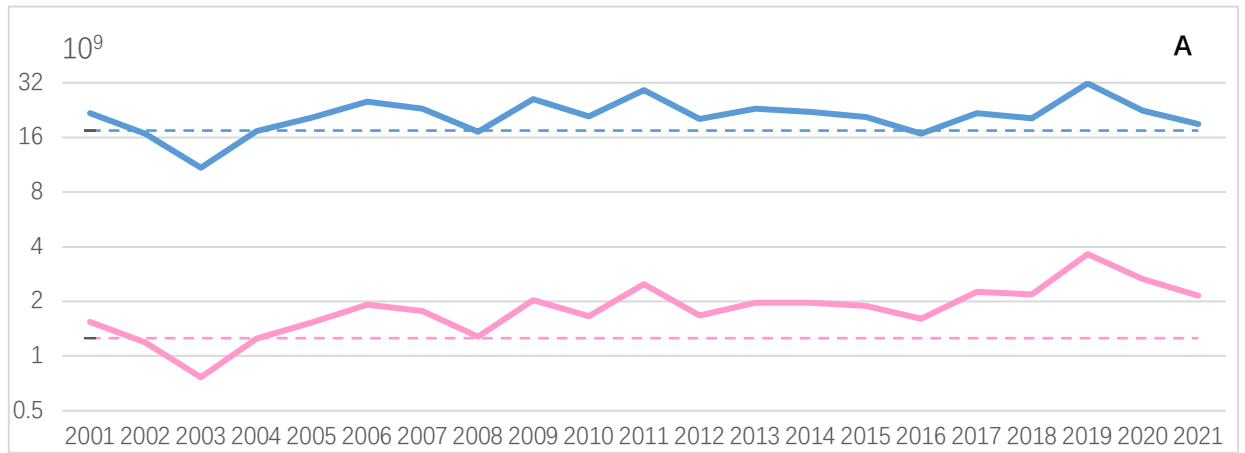

391

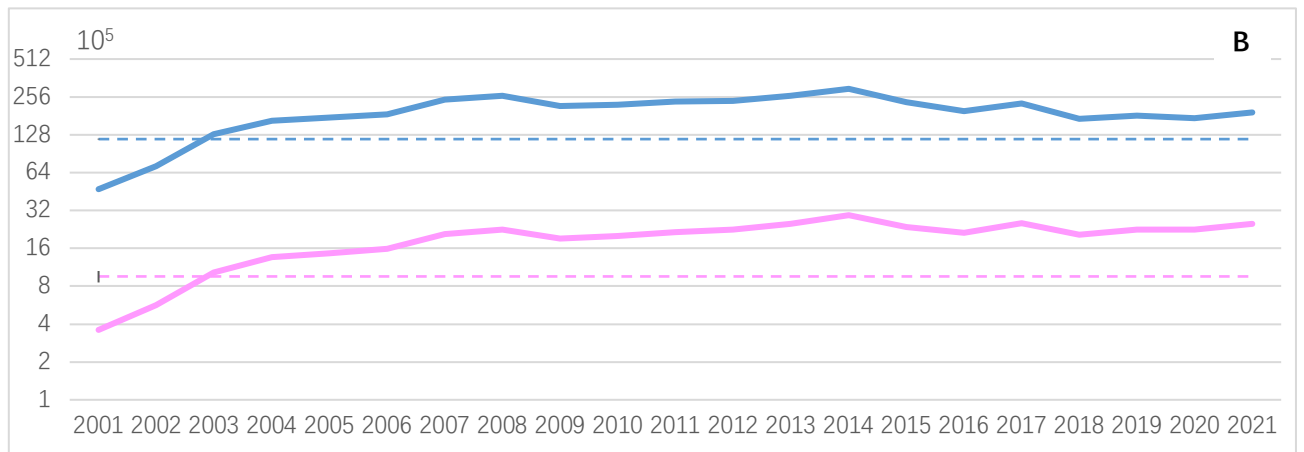

392

393

394 **Figure 10:** Model-based risks (A), satellite-observed exposure (B) for all age groups (blue) and people  
 395 older than 65 years (red) national trend from 2001-20. The solid line represents the person-days in each  
 396 year, and the horizontal dashed line represents the mean of the 2001–2005 reference period.

397

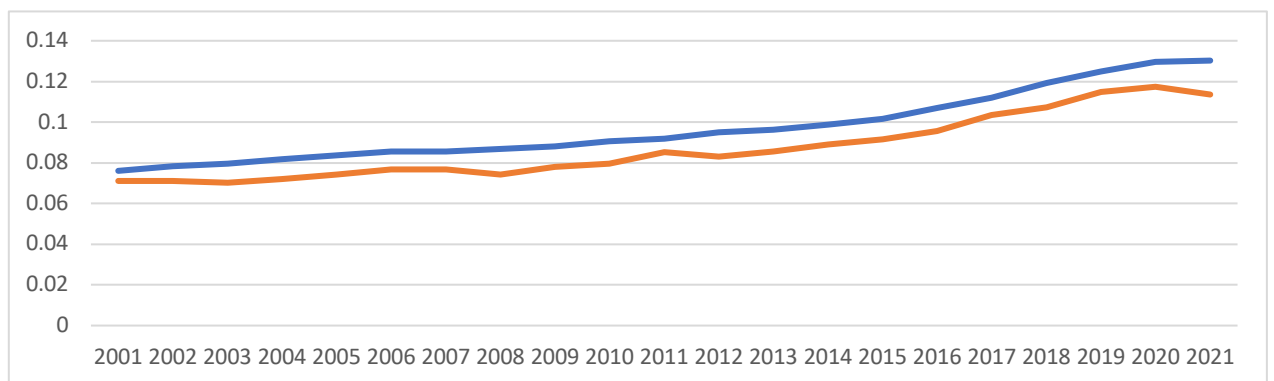

398

399 **Figure 11:** The proportion of model-based risks (orange) and satellite-observed exposure (blue) for  
 400 people older than 65 years to the total population national trend from 2001-20.

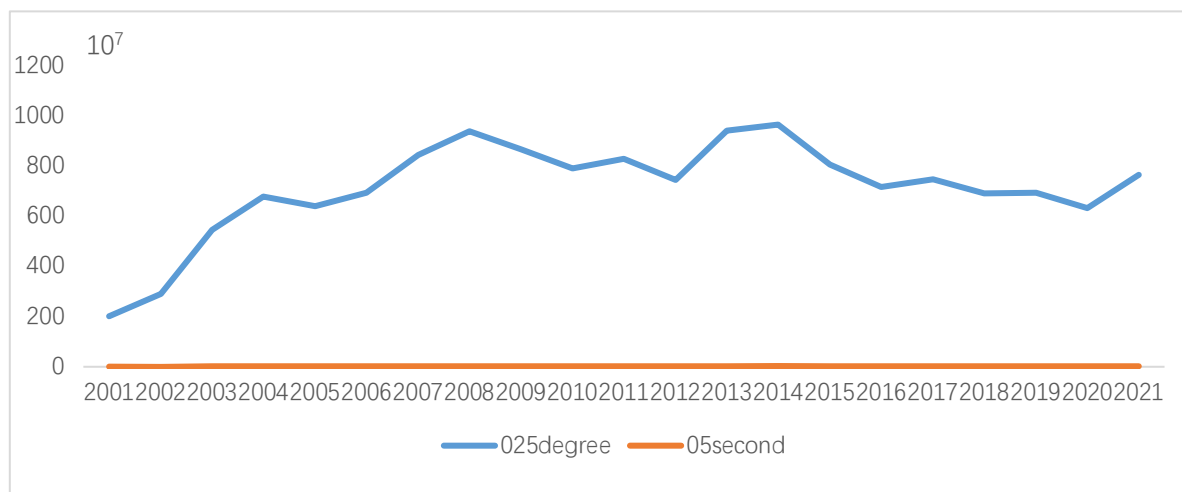

401  
402 **Figure 12:** The difference between results in wildfire exposure with 0.5° and these with 0.25° of  
403 population  
404

405 **Table 3: Population exposure to extreme rainfall and drought in 1986–2020.**

| Spatial Resolution | 2011-2005 average (10 <sup>7</sup> ) | 2017-2021 average(10 <sup>7</sup> ) |
|--------------------|--------------------------------------|-------------------------------------|
| 0.25degree         | 470.703307                           | 705.526691                          |
| 0.5second          | 1.18252826                           | 1.89170638                          |

406  
407 **Table 4: Wildfire Exposure grid spatial resolution in other articles.**

| Spatial Resolution | Range                | Citation                                                                                                                               |
|--------------------|----------------------|----------------------------------------------------------------------------------------------------------------------------------------|
| 0.5ationR          | China, 2001-2020     | 2020, 2021 China Lancet Countdown Report <sup>9,19</sup>                                                                               |
| 10 km x 10km       | Global, 2001-2020    | 2020, 2021 Global Lancet Countdown Report <sup>11,20</sup>                                                                             |
| 1 km x 1 km        | European, 1981 -2100 | Increasing risk over time of weather-related hazards to the European population: a data-driven prognostic study, TL Planet Health,2017 |

408  
409 **Indicator 1.2.2: Extreme rainfall and drought**

410 **Methods**

411 The calculation of this indicator follows the methodology described in the Global Lancet Countdown  
412 Reports in 2018 and 2019.<sup>21,22</sup>

413  
414 We used extreme rainfall events as an indicator of flood risk. The occurrence and duration of an extreme  
415 rainfall event was defined to start when the five-day total precipitations exceeding the ten-year return  
416 level and end when it dropped below this value. The ten-year return level of rainfall was calculated  
417 following previous research.<sup>23</sup> Briefly, the time series of daily precipitations was firstly descended. Then,  
418 the probability of exceedance (p) for a given rank was calculated according to the Gringorten formula:

419 
$$p = \frac{r - 0.44}{N + 0.12} \times 100$$



420 where  $N$  means the total days,  $r$  means the rank number of daily precipitations sorted in descending order.  
421 We calculated the grids with at least one occurrence of extreme rainfall, which was then summed to the  
422 national level. The population size exposed to extreme rainfall events was calculated by multiplying the  
423 counts of extreme rainfall events at each location by the local population (in person-events), compared  
424 with reference period (1986–2005) average. We also calculated per person exposure of people elder than  
425 65 years and all-age group, by dividing the annual exposure person-events or person-months by the total  
426 annual population.

427

428 The standardised precipitation index (SPI) is a recommended indicator of drought, representing the  
429 drought severity on multiple time scales.<sup>24</sup> Here, a given month was defined as being in a drought when  
430 the SPI-6, i.e., the six-month rolling sum of monthly precipitation, was less than  $-1.5$ . The national  
431 exposure to drought per year was calculated by summing the grids with at least one drought event this  
432 year. Exposure frequency of drought was measured as the number of person-months in drought. The  
433 national total exposure in drought was calculated as the sum of months in drought over each grid times  
434 the gridded population (in person-months).

435

436 In addition, the exposure of the elderly (over 65 years) was calculated. The trend of exposure population  
437 was analyzed by Mann Kendall trend test, a two-tailed  $p < 0.05$  was considered statistically significant.  
438 The average growth rate was calculated to analyze the change of population exposure in extreme rainfall  
439 and drought, from 1986 to 2020.

440

#### 441 **Data**

442

443 1. Climate data was collected from the CN05.1 dataset ( $0.25^\circ \times 0.25^\circ$ ) of the China Meteorological  
444 Administration.<sup>25,26</sup>

445 2. Population data for China ( $0.5^\circ \times 0.5^\circ$ ) was collected from a dataset developed by combining the NASA  
446 SEDAC Gridded Population of the World version 4 (GPWv4, UN WPP-Adjusted Population Count) with  
447 gridded population from the Inter-Sectoral Impact Model Intercomparison Project (ISIMIP, Histsoc  
448 gridded population data). It gave as 21 five-year age groups of population.<sup>15</sup>

449

#### 450 **Caveats**

451

452 This indicator focused on the meteorological flood and drought risk, which was only a necessary  
453 precursor. However not sufficient conditions for the occurrence of agricultural and hydrological floods  
454 and drought.

455

456 In addition, we used extreme rainfall events as a proxy indicator for flood in this report. That hindered  
457 the comparison with our previous reports, which concentrated on the recorded flood disasters.

458

459 Due to the limited availability of precipitation data, we cannot analyse the precipitation pattern in 2021.

460

461 **Future form of indicator**

462

463 Future versions of the indicator are expected to migrate to updated population data source with finer  
464 spatial resolution (0.25°×0.25°).

465

466 **Additional information**

467

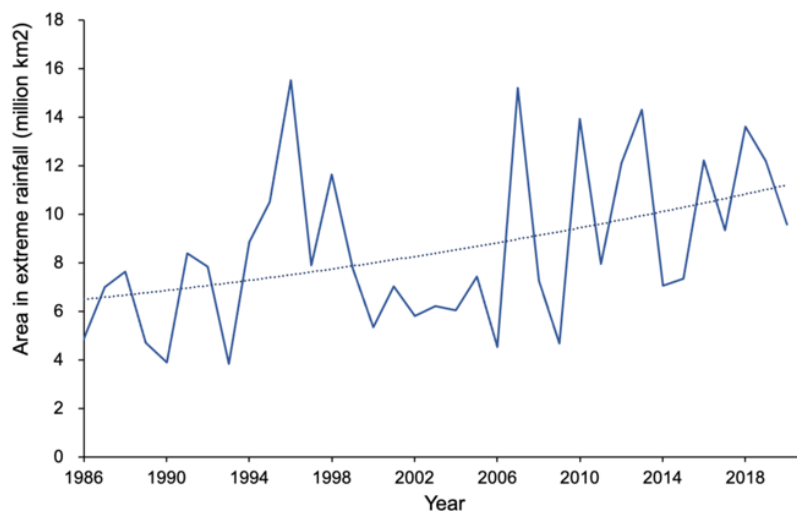

468

469 **Figure 13: Trend of national area in extreme rainfall in 1986–2020.**

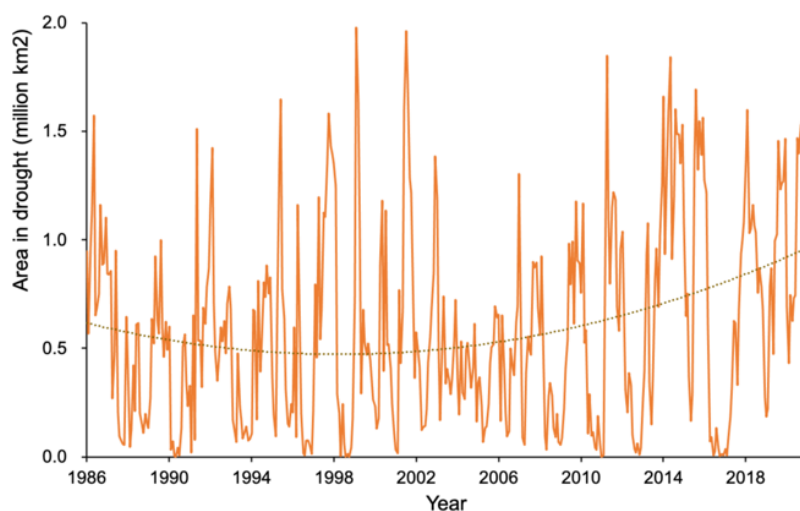

470

471 **Figure 14: Trend of national area in drought in 1986–2020.**

472

473 **Table 5: Population exposure to extreme rainfall and drought in 1986–2020.**

| Year              | Population exposure to extreme rainfall (million person-events) | Elderly population exposure to extreme rainfall (million person-events) | Population exposure to drought (million person-months) | Elderly population exposure to drought (million person-months) |
|-------------------|-----------------------------------------------------------------|-------------------------------------------------------------------------|--------------------------------------------------------|----------------------------------------------------------------|
| 1986–2005 average | 98.915                                                          | 10.326                                                                  | 995.569                                                | 106.887                                                        |

|      |         |        |          |         |
|------|---------|--------|----------|---------|
| 1986 | 35.554  | 1.884  | 1086.054 | 60.942  |
| 1987 | 26.180  | 1.481  | 387.781  | 19.689  |
| 1988 | 52.009  | 2.680  | 681.131  | 39.338  |
| 1989 | 89.620  | 4.953  | 1102.423 | 62.583  |
| 1990 | 44.312  | 2.385  | 457.449  | 25.666  |
| 1991 | 176.824 | 12.938 | 847.906  | 56.404  |
| 1992 | 39.830  | 2.591  | 1193.160 | 86.329  |
| 1993 | 58.667  | 4.133  | 460.131  | 31.935  |
| 1994 | 199.188 | 14.382 | 675.692  | 52.040  |
| 1995 | 96.732  | 6.526  | 695.325  | 46.225  |
| 1996 | 134.977 | 9.277  | 817.474  | 61.580  |
| 1997 | 105.418 | 7.817  | 2088.679 | 150.549 |
| 1998 | 153.077 | 10.453 | 385.810  | 25.924  |
| 1999 | 150.969 | 11.505 | 2228.762 | 158.064 |
| 2000 | 120.239 | 16.970 | 1299.862 | 186.613 |
| 2001 | 62.778  | 12.120 | 1558.657 | 318.614 |
| 2002 | 94.185  | 17.701 | 1263.419 | 247.912 |
| 2003 | 155.867 | 31.904 | 1166.550 | 227.575 |
| 2004 | 62.678  | 11.847 | 887.496  | 170.045 |
| 2005 | 119.206 | 22.978 | 627.629  | 109.716 |
| 2006 | 87.409  | 16.442 | 997.725  | 208.756 |
| 2007 | 144.889 | 29.026 | 801.725  | 156.243 |
| 2008 | 122.406 | 20.342 | 376.865  | 74.041  |
| 2009 | 52.670  | 10.837 | 748.146  | 137.478 |
| 2010 | 138.436 | 27.451 | 546.002  | 101.585 |
| 2011 | 47.445  | 8.947  | 3137.922 | 607.099 |
| 2012 | 171.047 | 34.731 | 472.770  | 91.083  |
| 2013 | 242.548 | 48.035 | 477.226  | 90.247  |
| 2014 | 121.028 | 21.106 | 343.219  | 63.649  |
| 2015 | 113.957 | 21.248 | 328.082  | 56.894  |
| 2016 | 244.508 | 48.600 | 38.601   | 7.008   |
| 2017 | 123.571 | 23.169 | 172.123  | 32.951  |
| 2018 | 221.393 | 40.387 | 226.400  | 40.242  |
| 2019 | 159.484 | 32.182 | 597.142  | 113.353 |
| 2020 | 218.258 | 43.407 | 299.103  | 48.902  |

474

475 **Table 6: National area affected by extreme rainfall in 1986–2020.**

| Year      | Area in extreme rainfall (million km <sup>2</sup> ) | Area in drought (million km <sup>2</sup> ) |
|-----------|-----------------------------------------------------|--------------------------------------------|
| 1986–2005 | 7.404                                               | 6.318                                      |

|         |        |        |
|---------|--------|--------|
| average |        |        |
| 1986    | 4.856  | 11.298 |
| 1987    | 7.006  | 5.363  |
| 1988    | 7.625  | 3.266  |
| 1989    | 4.700  | 6.852  |
| 1990    | 3.894  | 2.541  |
| 1991    | 8.381  | 6.938  |
| 1992    | 7.831  | 8.275  |
| 1993    | 3.838  | 2.431  |
| 1994    | 8.838  | 7.371  |
| 1995    | 10.494 | 6.594  |
| 1996    | 15.513 | 3.074  |
| 1997    | 7.906  | 11.884 |
| 1998    | 11.650 | 3.633  |
| 1999    | 7.750  | 8.956  |
| 2000    | 5.338  | 5.924  |
| 2001    | 7.013  | 10.979 |
| 2002    | 5.794  | 5.995  |
| 2003    | 6.200  | 6.103  |
| 2004    | 6.025  | 4.561  |
| 2005    | 7.431  | 4.325  |
| 2006    | 4.531  | 4.894  |
| 2007    | 15.194 | 7.224  |
| 2008    | 7.256  | 3.417  |
| 2009    | 4.669  | 7.666  |
| 2010    | 13.925 | 3.959  |
| 2011    | 7.956  | 10.316 |
| 2012    | 12.100 | 3.208  |
| 2013    | 14.319 | 8.281  |
| 2014    | 7.044  | 16.952 |
| 2015    | 7.356  | 12.191 |
| 2016    | 12.225 | 3.498  |
| 2017    | 9.331  | 5.894  |
| 2018    | 13.606 | 11.676 |
| 2019    | 12.188 | 11.249 |
| 2020    | 9.581  | 13.368 |

476

477

478

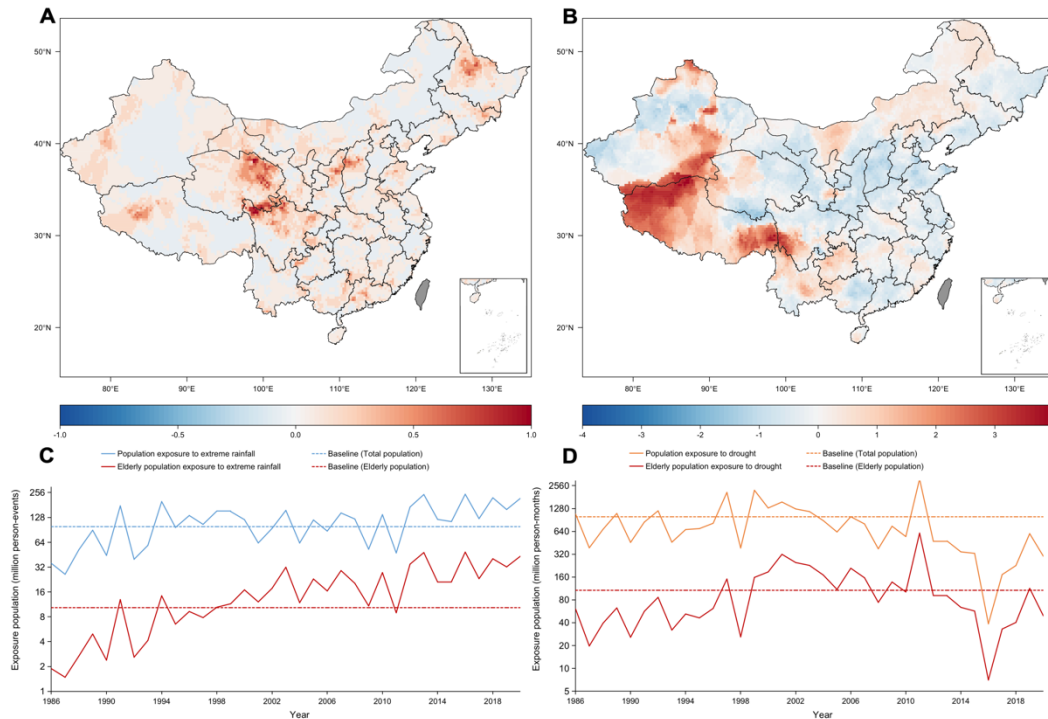

479

480 **Figure 15: Change in number and exposure of extreme rainfall and drought during 1986–2020**

481 (A) Mean change in number of extreme rainfall events per year over 2000–20 compared with the 1986–  
 482 2005 average. (B) Mean change in number of droughts per year over 2000–20 compared with 1986–  
 483 2005 average. (C) Exposure to extreme rainfall events in 1986–2020. The horizontal dashed line shows  
 484 the mean of the 1986–2005 reference period. (D) Drought exposure in 1986–2020. The horizontal dashed  
 485 line shows the mean of the 1986–2005 reference period.

486

487 **Indicator 1.3: Climate-sensitive infectious diseases**

488 **Methods**

489 There are three sub-indicators – the climate suitability for *Aedes aegypti* and *Ae. albopictus*, the  
 490 vulnerability index to dengue, and the disease burden for dengue in China. The methodology for these  
 491 indicators were the same as the 2020 China Lancet Countdown report. And the report was divided into  
 492 the provincial level results.

493 The climate suitability *Ae. aegypti* and *Ae. albopictus* is represented by vectorial capacity (VC), which  
 494 expresses the average daily number of subsequent cases in a susceptible population resulting from one  
 495 infected case. It is affected by climatic and environmental factors such as land-use type, temperature and  
 496 rainfall. The VC was calculated according to the method provided by Rocklöv et al.(2019)<sup>27</sup> and Liu-  
 497 Helmersson et al. (2014)<sup>28</sup>. It takes into account interaction among host, vector and virus. VC is expressed  
 498 as:

499

$$VC = xy ma^2 b_m p^n / - \ln p$$

500 Where  $x$  is the ratio referring to the number of *Aedes* vector distribution counties in each year after 2016  
 501 divided by the number of *Aedes* vector distribution counties in 2016,  $y$  is the ratio referring to urban  
 502 population proportion in each year after 2004 divided by urban population proportion in 2004,  $a$  is the  
 503 average vector biting rate,  $b_m$  is the probability of vector infection and transmission of virus to its saliva,  
 504  $p$  is the daily survival probability,  $n$  is the duration of the extrinsic incubation period (EIP) , and  $m$  is set  
 505 to 1 assuming female vector and human population as in Watts et al.(2019).<sup>22</sup> Detailed model description  
 506 and explanation, as well as the relationship between daily temperature with these parameters can be found  
 507 in Rocklöv et al. (2019).<sup>27</sup> In this study, the time unit is 1 day, and each vector parameter depends on the  
 508 temperature. The parameter value comes from the literature, usually from experimental data, as described  
 509 in Liu-Helmersson et al. (2014).<sup>28</sup> The trend of VC time series was analyzed by Mann Kendall trend test.  
 510 The time unit is 1 year. A two-tailed  $p < 0.05$  was considered statistically significant.

511 The dengue vulnerability index was calculated by dividing VC with average International Health  
 512 Regulation (IHR) core capacity. The average of IHR core capacity scores is the percentage of attributes  
 513 of 13 core capacities that have been attained at a specific point in time (presented on an annual basis). It  
 514 measures the ability to detect, assess, report, inform and deal with public health emergencies.

515 The 13 core capacities of IHR are: (1) National legislation, policy and financing; (2) Coordination and  
 516 National Focal Point communications; (3) Surveillance; (4) Response; (5) Preparedness; (6) Risk  
 517 communication; (7) Human resources; (8) Laboratory; (9) Points of entry; (10) Zoonotic events; (11)  
 518 Food safety; (12) Chemical events; (13) Radionuclear emergencies.

519 
$$\text{Vulnerability} = \frac{\text{VC}}{\text{Average IHR core capacity score}}$$

520 Considering the limitation of the availability of provincial-level IHR score in China, we replace the  
 521 average IHR core capacity score with average provincial comprehensive health emergencies  
 522 management index reported in indicator 2.2.1 in this report. The index developed in indicator 2.2.1 in  
 523 this report considers 20 indicators covering three aspects (risk exposure and preparedness, detection and  
 524 response, and resource support and social participation), which is similar to the assessment framework  
 525 of IHR. This index was then calibrated with correction coefficient of the provincial health emergency  
 526 management index which was set according to literature with the eastern provinces as the baseline, the  
 527 central and western provinces multiplied by 0.951 and 1.0024 respectively.

528 Then, the estimated vulnerability of provincial-level from 2010-2020 is calculated by the following  
 529 formula:

530 
$$\text{Estimated vulnerability} = \frac{\text{VC}}{\text{Average provincial comprehensive health emergencies management index}}$$

531 And, the average provincial comprehensive health emergencies management index, 2010-2020 is  
 532 calculated by the following formula:

$$\begin{aligned}
 & \text{Average provincial comprehensive health emergencies management index, 2010 – 2020} \\
 & = \left( \frac{\text{average comprehensive health emergencies management ability score in China in 2019}}{\text{average IHR score in China in 2019}} \right) \\
 & \times (\text{average IHR score in China, 2010 – 2020}) \times \text{Correction efficient}
 \end{aligned}$$

536 The national Disability-Adjusted Life Years (DALYs) for dengue fever between 2005 and 2020 are  
 537 calculated based on the method provided by Xu et al. (2020) which is updated based on the technical  
 538 basis for DALYs of the World Health Organization (Murray, 1994). The national trends are presented as  
 539 all-age DALY rates per 1,000,000 individuals over the period.

$$\text{DALY} = \int_a^{a+L} D [K C x e^{-\beta x} + (1 - K)] e^{-r(x-a)} dx$$

541 Time lived at different ages has been valued using an exponential function of the form  $Cx e^{-\beta x}$ . A  
 542 continuous discounting function of the form  $e^{-r(x-a)}$  has been used where  $r$  is the discount rate and  $a$   
 543 is the age of onset.  $D$  is the disability weight (or 1 for premature mortality).  $K$  is an age-weighting  
 544 modifier. The solution of the definite integral from the age of onset  $a$  to  $a+L$  where  $L$  is the duration of  
 545 disability or time lost due to premature mortality gives us the DALY formula for an individual:

$$\text{DALY} = \frac{KDC e^{-\beta a}}{(\beta + r)^2} [e^{-(\beta+r)L} (1 + (\beta + r)(l + a)) - (1 + (\beta + r)a)] + \frac{D(1 - K)}{r} (1 - e^{-rL})$$

547 Where  $D$  is the disability weight (or 1 for premature mortality),  $r$  is the discount rate,  $C$  is the age-  
 548 weighting correction constant,  $\beta$  is the parameter from the age-weighting function,  $a$  is the age of onset,  
 549 and  $L$  is the duration of disability or time lost due to premature mortality. In the specific form used for  
 550 calculating DALYs,  $r$  equals 0.03,  $\beta$  equals 0.04, and  $C$  equals 0.1658 (Murray, 1994)<sup>29</sup>.  $K$  equals 1.  
 551  $L$  is set as 14 days and  $D$  equals 0.81 for dengue based on Endy et al. (2007)<sup>30</sup>, Shepard et al. (2013)<sup>31</sup>,  
 552 and Guidelines for clinical diagnosis and treatment of dengue fever in China (2018)<sup>32</sup>.

## 553 Data

- 554 1. Monthly average daily temperature data with the resolution 0.25° from 2004-2020 were from  
 555 Library for Climate Studies of Chinese Meteorological Administration.<sup>33</sup>
- 556 2. The spatio-temporal distributions of *Ae. aegypti* and *Ae. albopictus* in China were from the China  
 557 CDC.<sup>34</sup>
- 558 3. The data of Urbanization rates in China were from the 2021 Statistical Yearbook
- 559 4. The IHR core capacity scores from 2010 to 2020 in China were downloaded from WHO website.<sup>35</sup>
- 560 5. The provincial comprehensive health emergencies management index in 2019 is from Indicator 2.2.1

- 561 of this report.
- 562 6. The correction coefficients of provincial health emergency management index were set according to
- 563 a reference.<sup>36</sup>
- 564 7. The incidence and mortality data of dengue fever come from the infectious disease information
- 565 monitoring system of the China CDC.

566 **Additional Information**

567 Total VC in most of the provinces in China has increased since 2004. *Ae. albopictus* only existed in 25

568 provincial-level administration divisions (PLADs) of China, and *Ae. aegypti* only existed in Guangdong,

569 Hainan and Yunnan, according to spatio-temporal distributions of *Ae. aegypti* and *Ae. albopictus* in China

570 provided by China CDC. Means of total VC in Guangdong and Hainan were the highest, and means of

571 total VC in provinces in southwestern border and southeastern coastal areas were relatively higher

572 (**Figure 16**). The VC from 19 PLADs in China shows statistically significant increasing trend between

573 2004-2020(**Figure 17**).

574

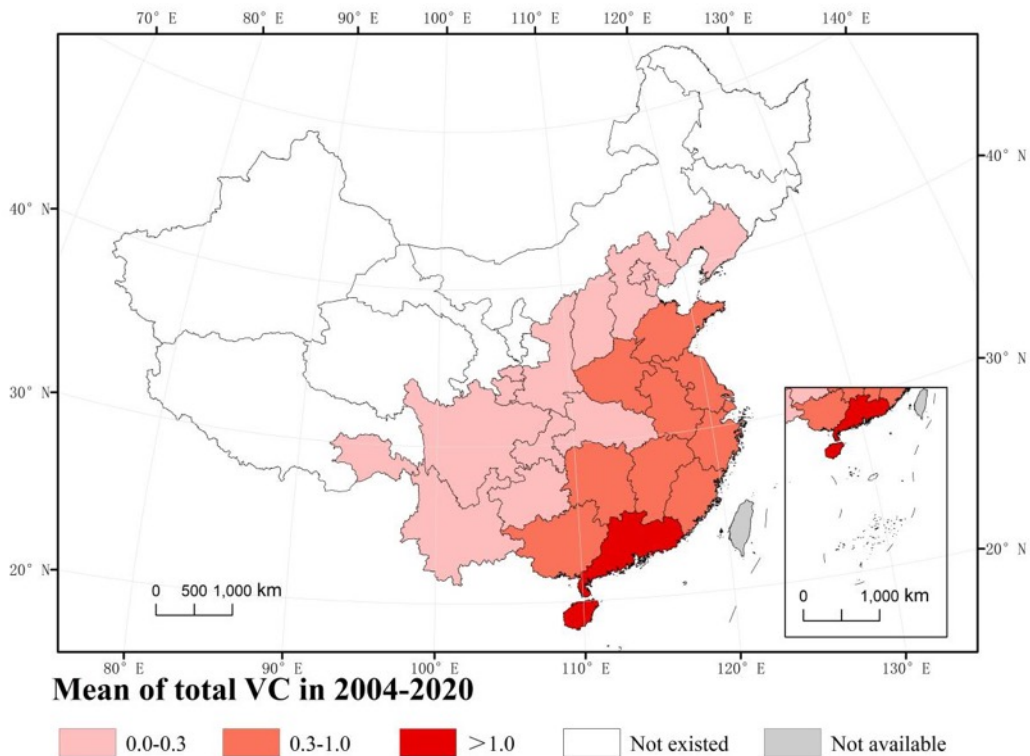

575

576 **Figure 16:**Mean of total VC in China in 2004-2020.



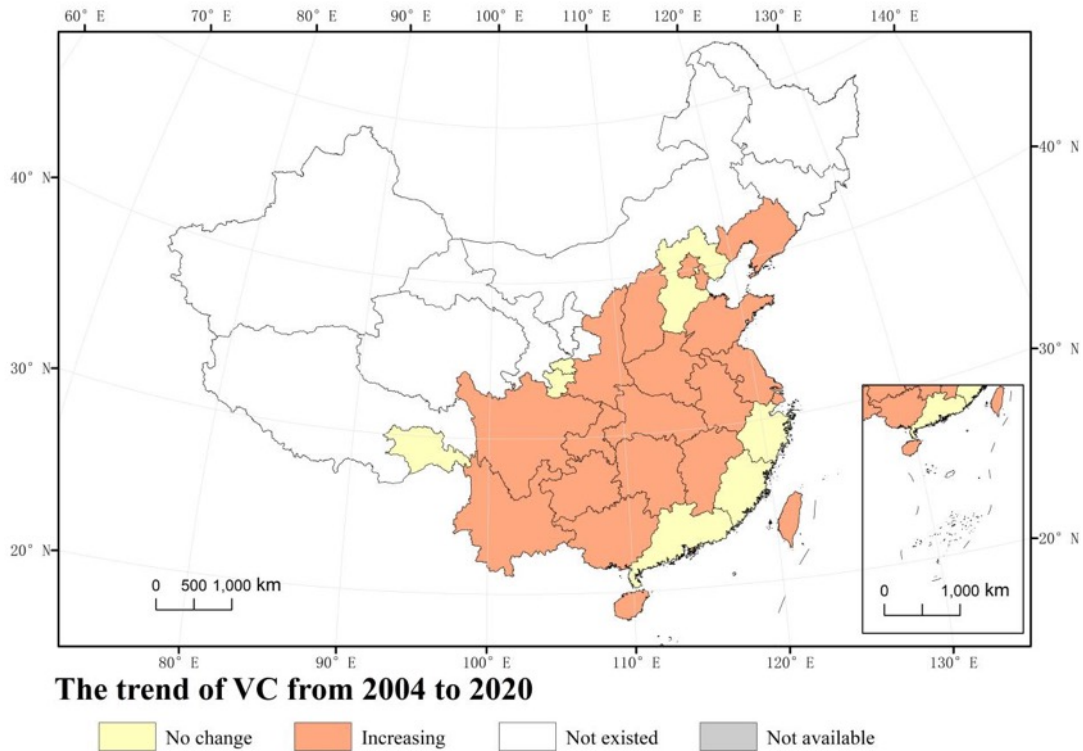

577

578 **Figure 17:** The result of Mann—Kendall test of the trend of VC, China, 2004-2020.

579

580 Dengue vulnerability index in 20 single *Ae. albopictus* distribution PLADs show an increasing trend  
581 from 2010-2020. These PLADs include Gansu, Beijing, Shanxi, Liaoning, Jiangsu, Zhejiang, Anhui,  
582 Fujian, Jiangxi, Shandong, Tianjin, Henan, Hubei, Hunan, Guangxi, Sichuan, Guizhou, Shaanxi,  
583 Shanghai, Chongqing, respectively. In contrast, dengue vulnerability index in 2 single *Ae. albopictus*  
584 distribution PLADs, including Tibet and Hebei, show no obvious change.

585 For dengue vulnerability index in 3 PLADs with both *Ae. aegypti* and *Ae. albopictus* distribution, it  
586 shows an increasing trend of Guangdong, Hainan and Yunnan from 2011-2020. Specifically, compared  
587 with the average DF vulnerability from 2011-2015, that increased slightly in 3 PLADs with both *Ae.*  
588 *aegypti* and *Ae. albopictus* distribution, including Guangdong (12.19%), Hainan (9.29%), and Yunnan  
589 (1.37%), respectively, from 2016-2020. Change for the mean DF vulnerability from 2011-2015  
590 compared with that from 2016-2020 is shown in **Figure 18**. The average DF vulnerability show no  
591 change of that in Tibet and Gansu, and an increasing trend of that in other 23 PLADs.

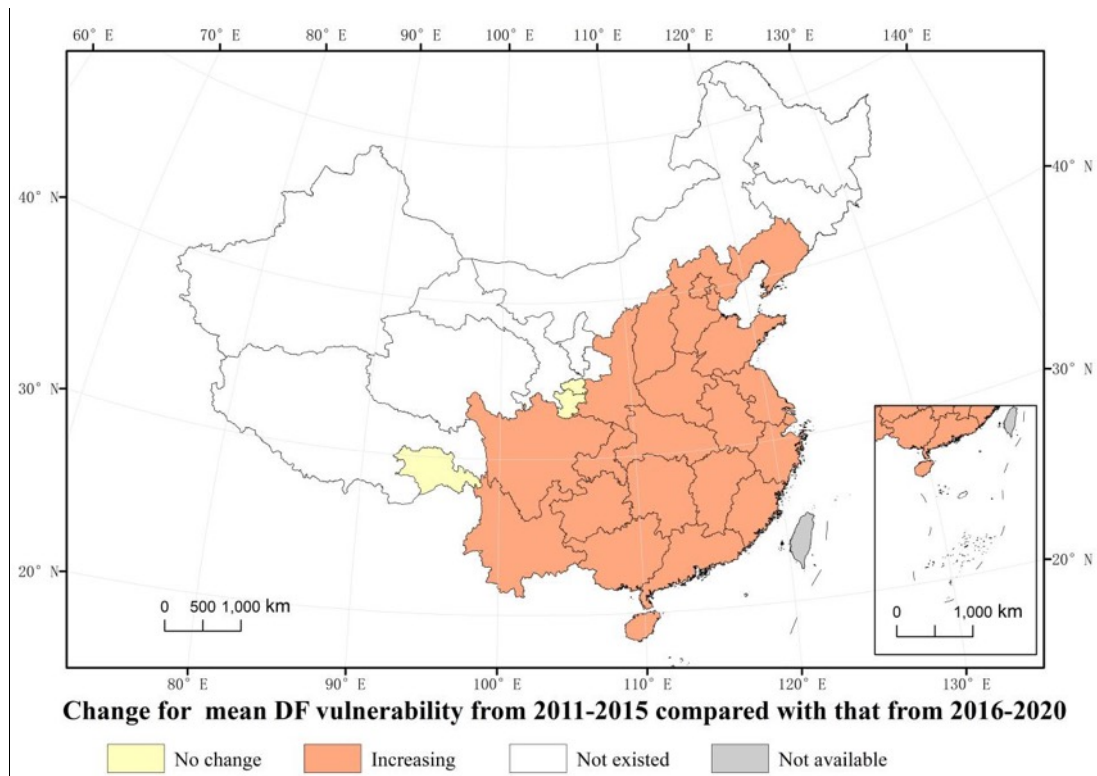

592

593 **Figure 18:** Change for mean DF vulnerability from 2011-2015 compared with that from 2016-2020

594 Compared with the DF vulnerability index in 2010, it increased in 3 PLADs with both *Ae. aegypti* and  
 595 *Ae. albopictus* distribution in 2020, including Guangdong (28.2%), Hainan (34.18%), and Yunnan  
 596 (33.01%), respectively (**Figure 19**) (**Table 7**).

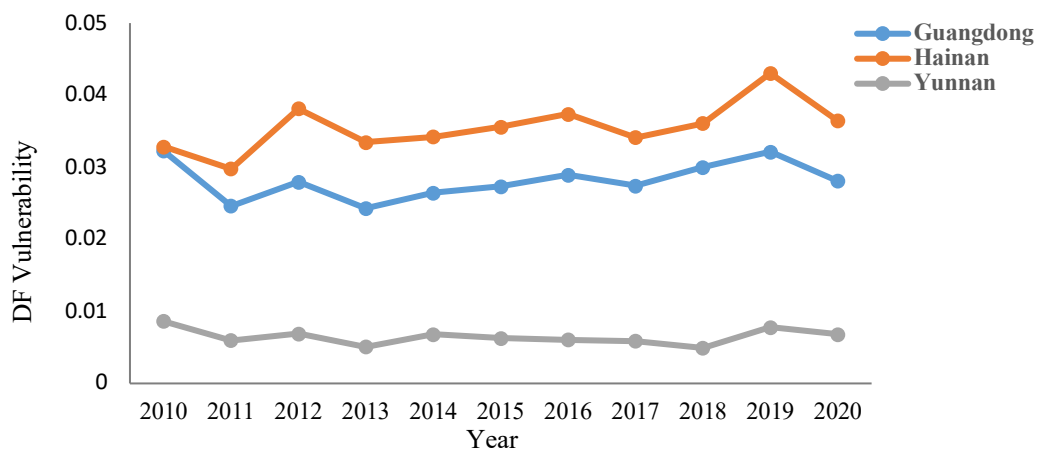

597

598 **Figure 19:** Dengue vulnerability index in 3 PLADs with both *Ae. aegypti* and *Ae. albopictus* distribution,  
 599 China, 2010-2020.

600

601 **Table 7:** Provincial-vulnerability index of dengue fever between 2010 and 2020 in China

| No | PLADs     | District | Vulnerability index |              |              |              |              |              |              |              |              |              |              |
|----|-----------|----------|---------------------|--------------|--------------|--------------|--------------|--------------|--------------|--------------|--------------|--------------|--------------|
|    |           |          | 2010                | 2011         | 2012         | 2013         | 2014         | 2015         | 2016         | 2017         | 2018         | 2019         | 2020         |
| 1  | Beijing   | Eastern  | 0.002<br>243        | 0.002<br>272 | 0.002<br>118 | 0.002<br>121 | 0.002<br>32  | 0.001<br>921 | 0.002<br>478 | 0.002<br>419 | 0.003<br>483 | 0.002<br>871 | 0.002<br>441 |
| 2  | Tianjin   | Eastern  | 0.005<br>448        | 0.005<br>337 | 0.005<br>287 | 0.005<br>108 | 0.005<br>243 | 0.005<br>014 | 0.005<br>41  | 0.006<br>157 | 0.006<br>847 | 0.006<br>727 | 0.005<br>417 |
| 3  | Hebei     | Eastern  | 0.004<br>704        | 0.003<br>536 | 0.003<br>28  | 0.003<br>544 | 0.003<br>233 | 0.003<br>017 | 0.003<br>322 | 0.003<br>849 | 0.004<br>817 | 0.004<br>009 | 0.003<br>206 |
| 4  | Shanxi    | Central  | 0.002<br>512        | 0.001<br>721 | 0.001<br>757 | 0.002<br>667 | 0.000<br>944 | 0.001<br>593 | 0.001<br>975 | 0.002<br>507 | 0.004<br>017 | 0.003<br>809 | 0.002<br>41  |
| 5  | Liaoning  | Eastern  | 0.002<br>279        | 0.002<br>294 | 0.002<br>227 | 0.003<br>352 | 0.003<br>166 | 0.002<br>467 | 0.003<br>425 | 0.003<br>824 | 0.004<br>677 | 0.003<br>742 | 0.003<br>843 |
| 6  | Shanghai  | Eastern  | 0.005<br>893        | 0.006<br>44  | 0.006<br>844 | 0.005<br>843 | 0.005<br>218 | 0.005<br>49  | 0.006<br>849 | 0.006<br>405 | 0.008<br>481 | 0.006<br>873 | 0.007<br>085 |
| 7  | Jiangsu   | Eastern  | 0.005<br>263        | 0.004<br>144 | 0.005<br>309 | 0.004<br>663 | 0.003<br>783 | 0.003<br>804 | 0.004<br>844 | 0.005<br>005 | 0.005<br>917 | 0.005<br>141 | 0.004<br>88  |
| 8  | Zhejiang  | Eastern  | 0.008<br>477        | 0.004<br>841 | 0.004<br>856 | 0.005<br>671 | 0.004<br>171 | 0.003<br>572 | 0.005<br>224 | 0.005<br>535 | 0.006<br>161 | 0.005<br>066 | 0.005<br>667 |
| 9  | Anhui     | Central  | 0.007<br>768        | 0.006<br>197 | 0.007<br>396 | 0.007<br>124 | 0.005<br>41  | 0.005<br>516 | 0.006<br>544 | 0.006<br>815 | 0.008<br>283 | 0.008<br>021 | 0.006<br>934 |
| 10 | Fujian    | Eastern  | 0.007<br>221        | 0.005<br>952 | 0.005<br>917 | 0.005<br>93  | 0.005<br>985 | 0.004<br>774 | 0.006<br>247 | 0.006<br>055 | 0.006<br>107 | 0.005<br>853 | 0.006<br>238 |
| 11 | Jiangxi   | Central  | 0.009<br>442        | 0.009<br>082 | 0.009<br>326 | 0.009<br>787 | 0.009<br>061 | 0.008<br>305 | 0.009<br>746 | 0.009<br>729 | 0.011<br>343 | 0.010<br>726 | 0.010<br>506 |
| 12 | Shandong  | Eastern  | 0.003<br>614        | 0.005<br>597 | 0.006<br>879 | 0.007<br>399 | 0.005<br>659 | 0.006<br>163 | 0.007<br>079 | 0.008<br>023 | 0.008<br>741 | 0.008<br>984 | 0.006<br>581 |
| 13 | Henan     | Central  | 0.005<br>663        | 0.005<br>522 | 0.007<br>148 | 0.008<br>661 | 0.005<br>662 | 0.005<br>45  | 0.007<br>494 | 0.008<br>048 | 0.009<br>211 | 0.009<br>855 | 0.007<br>768 |
| 14 | Hubei     | Central  | 0.005<br>677        | 0.004<br>804 | 0.006<br>205 | 0.007<br>028 | 0.004<br>483 | 0.004<br>596 | 0.006<br>602 | 0.006<br>257 | 0.007<br>787 | 0.007<br>582 | 0.005<br>661 |
| 15 | Hunan     | Central  | 0.008<br>494        | 0.008<br>874 | 0.009<br>951 | 0.011<br>099 | 0.007<br>822 | 0.008<br>329 | 0.010<br>289 | 0.010<br>897 | 0.012<br>709 | 0.012<br>011 | 0.011<br>916 |
| 16 | Guangdong | Eastern  | 0.032<br>251        | 0.024<br>63  | 0.027<br>971 | 0.024<br>304 | 0.026<br>428 | 0.027<br>317 | 0.028<br>938 | 0.027<br>448 | 0.030<br>001 | 0.032<br>119 | 0.028<br>074 |
| 17 | Guangxi   | Eastern  | 0.010<br>701        | 0.010<br>706 | 0.012<br>494 | 0.010<br>386 | 0.012<br>467 | 0.012<br>299 | 0.014<br>026 | 0.012<br>168 | 0.013<br>029 | 0.014<br>614 | 0.014<br>035 |

|    |           |         |          |          |          |          |          |          |          |          |          |          |          |
|----|-----------|---------|----------|----------|----------|----------|----------|----------|----------|----------|----------|----------|----------|
| 18 | Hainan    | Eastern | 0.032842 | 0.029763 | 0.038109 | 0.033462 | 0.03424  | 0.035594 | 0.037356 | 0.034136 | 0.03607  | 0.043044 | 0.03646  |
| 19 | Chongqing | Western | 0.004516 | 0.004378 | 0.003845 | 0.005276 | 0.003382 | 0.002675 | 0.004972 | 0.004991 | 0.005331 | 0.004649 | 0.004063 |
| 20 | Sichuan   | Western | 0.001748 | 0.00221  | 0.001628 | 0.002557 | 0.001329 | 0.001654 | 0.002534 | 0.002048 | 0.002466 | 0.002078 | 0.002017 |
| 21 | Guizhou   | Western | 0.002273 | 0.003166 | 0.002216 | 0.003734 | 0.003001 | 0.002211 | 0.003484 | 0.003223 | 0.003645 | 0.003493 | 0.003778 |
| 22 | Yunnan    | Western | 0.008614 | 0.005969 | 0.006902 | 0.005063 | 0.006836 | 0.006286 | 0.006047 | 0.006889 | 0.005924 | 0.007812 | 0.006808 |
| 23 | Tibet     | Western | 0        | 0        | 0        | 0        | 0        | 0        | 0        | 0        | 0        | 0        | 0        |
| 24 | Shaanxi   | Western | 0.001195 | 0.000606 | 0.001962 | 0.002434 | 0.001152 | 0.001307 | 0.002855 | 0.002397 | 0.002503 | 0.001623 | 0.001243 |
| 25 | Gansu     | Western | 0        | 0        | 0        | 0        | 0        | 0        | 0.00062  | 0.000702 | 0        | 0        | 0        |

602

603 **Table 8:** National all-age DALY rate between 2005 and 2019 for dengue in China

| Year | All-age DALY rate (per 1 000 000) |
|------|-----------------------------------|
| 2005 | 0.03                              |
| 2006 | 0.03                              |
| 2007 | 0.02                              |
| 2008 | 0.01                              |
| 2009 | 0.01                              |
| 2010 | 0.01                              |
| 2011 | 0.02                              |
| 2012 | 0.02                              |
| 2013 | 0.14                              |
| 2014 | 1.35                              |
| 2015 | 0.11                              |
| 2016 | 0.06                              |
| 2017 | 0.19                              |
| 2018 | 0.17                              |
| 2019 | 0.66                              |
| 2020 | 0.02                              |

604

605 **Caveats**

606 Overall, VC should be improved by a more sophisticated model in the future. In addition, lacking data  
607 concerning IHR core capacities score in each province of China is another major caveat.

608 **Future Form of Indicator**

609 In future reports, VC can be calculated considering more climatic, environmental and social factors  
610 according to different mosquito virus serotypes. New information about data, method and spatial-  
611 temporal scale, etc. can be investigated further.

612 In addition, the DF vulnerability index of the provinces with *Ae. aegypti* and *Ae. albopictus* distribution  
613 can be calculated if we can obtain more index to estimate the precise comprehensive health emergencies  
614 management index at the provincial level.

615

616 **Indicator 1.4: Population exposure to regional sea level rise**

617 **Methods**

618 This is the first year the indicator has been included in the Lancet Countdown China report. We adopted  
619 this indicator from the Lancet Countdown global report with a modification according to China coastal  
620 areas. This indicator represents a measure of population exposure to future projected regional sea level  
621 (RSL) rise under various greenhouse gas emissions based on current population distribution and coastal  
622 elevation.

623 Firstly, regional sea level rise projections from the Chapter 9 of IPCC AR6 are extracted along the coastal  
624 areas of China from 2020 to 2150 in multiple greenhouse gas emission scenarios: low emission (SSP1-  
625 1.9), moderate emission (SSP2-4.5), and high emission (SSP5-8.5). Secondly, the potential inundation  
626 areas are determined by overlays future regional sea level under different emission scenarios and years  
627 with grid-cells coastal elevation value (CoastalDEM90TMv2.1). Thirdly, using the population grid data  
628 (GPWv4) in the coastal areas of China in 2020, the population exposure to sea level rise is calculated  
629 from the population number on the grid cells that are submerged. Finally, the province-level population  
630 exposure is obtained by aggregating the grid-cell population exposure to the province areas, to reveal the  
631 risk at administrative level. The population over 65 years old is obtained from multiplying total  
632 population exposure by the proportion of the elderly population in each province based on 2020  
633 population census of China.

634

635 **Data**

- 636 1. Regional sea level data projections in 3 GHG emission scenarios from 2020 to 2150 are from  
637 Chapter 9 of IPCC AR6<sup>37,38</sup>.
- 638 2. The coastal elevation data in 2021 is extracted from the Coastal Digital Elevation Model  
639 (CoastalDEM90TMv2.1)<sup>39</sup>.

- 640 3. The 1km-resolution population data in 2020 is obtained from the Gridded Population of the World,  
 641 Version 4 (GPWv4)<sup>40</sup>.  
 642 4. 2020 population census of China<sup>41</sup>.

643

644 **Caveats**

645 The major uncertainties of this indicator come from projected sea level rise, which varies  
 646 according to the projected timeframes, emission scenarios, and the methods involving contributions from  
 647 multiple factors, e.g. dynamic sea level, glacier and ice sheet melting etc.

648 There are large uncertainties of future projections on population distribution and age structure due  
 649 to uncertainties of socioeconomic development, policy adjustment or unpredicted catastrophes, etc. As  
 650 the first version of this indicator, we implement current population data in 2020 instead of future  
 651 population changes. Therefore, this indicator highlights the current population exposure to the changes  
 652 and uncertainties of projected regional sea level rise along the China coastal areas. The impact of  
 653 uncertainties and changes of population projections are not included in the current version of this  
 654 indicator.

655 Unlike the indicator in the Lancet Countdown global report, this indicator did not include  
 656 migration and displacement due to regional sea level rise or climate changes, because no national-level  
 657 policies report related to migration and displacement due to climate change is found in China at current  
 658 stage.

659

660

661 **Future Form of Indicator**

662 In future forms of this indicator projected future population data under various socioeconomic pathways  
 663 could be used to reveal effects from both population evolution and RSL changes on population exposure.  
 664 In addition, the economic activity could be also included to consider the vulnerability and adaptability  
 665 of the population who are exposed to the RSL rise. If the accuracy and spatial resolution of the data are  
 666 updated, the calculation methods will be further optimized, thus improving the reliability of population  
 667 exposure.

668

669

670 **Additional Information**

671

- 672 1. The median estimation and likely range of regional sea level (RSL) rises averaged along the China  
 673 coast are shown in **Table 9**.  
 674 2. The median estimation and likely range of population exposure to regional sea level (RSL) rise can  
 675 be found in **Table 10**.  
 676 3. The population exposure in each coastal province in 2100 is shown in **Figure 21**. Median  
 677 estimation of population exposure to regional sea level rise in each province along Chinese coast  
 678 in 2100 under 3 different scenarios: SSP1-1.9, SSP2-4.5, SSP5-8.5.

679

680 **Table 9:** Averaged of regional sea level rise of China at 17th, 50th, 83th percentile in 2060, 2100, and  
 681 2150 and three emission scenarios (SSP1-1.9, SSP2-4.5, SSP5-8.5).

| Year | Percentile | SSP1-1.9 | SSP2-4.5 | SSP5-8.5 |
|------|------------|----------|----------|----------|
|      | 17         | 0.051    | 0.092    | 0.141    |

|             |    |       |       |       |
|-------------|----|-------|-------|-------|
| <b>2060</b> | 50 | 0.219 | 0.261 | 0.313 |
|             | 83 | 0.403 | 0.447 | 0.503 |
| <b>2100</b> | 17 | 0.067 | 0.245 | 0.469 |
|             | 50 | 0.382 | 0.566 | 0.806 |
|             | 83 | 0.723 | 0.932 | 1.206 |
| <b>2150</b> | 17 | 0.072 | 0.395 | 0.776 |
|             | 50 | 0.576 | 0.946 | 1.400 |
|             | 83 | 1.124 | 1.584 | 2.166 |

682

683

684 **Table 10:** Population exposure of China at 17<sup>th</sup>, 50<sup>th</sup>, 83<sup>th</sup> percentile in 2060, 2100, and 2150 and three  
685 emission scenarios (SSP1-1.9, SSP2-4.5, SSP5-8.5).

| <b>Year</b> | <b>Percentile</b> | <b>SSP1-1.9</b> | <b>SSP2-4.5</b> | <b>SSP5-8.5</b> |
|-------------|-------------------|-----------------|-----------------|-----------------|
| <b>2060</b> | 17                | 19716           | 36722           | 59810           |
|             | 50                | 90315           | 99826           | 156183          |
|             | 83                | 226972          | 266367          | 339140          |
| <b>2100</b> | 17                | 25810           | 114762          | 287619          |
|             | 50                | 207063          | 439513          | 855383          |
|             | 83                | 712431          | 1115618         | 1873287         |
| <b>2150</b> | 17                | 27462           | 215282          | 796560          |
|             | 50                | 458814          | 1138690         | 2566208         |
|             | 83                | 1608825         | 3309120         | 7265057         |

686

687 **Table 11:** Population exposure of people over 65 years-old in China at 17<sup>th</sup>, 50<sup>th</sup>, 83<sup>th</sup> percentile in 2060,  
688 2100, and 2150 and three emission scenarios (SSP1-1.9, SSP2-4.5, SSP5-8.5).

| <b>Year</b> | <b>Percentile</b> | <b>SSP1-1.9</b> | <b>SSP2-4.5</b> | <b>SSP5-8.5</b> |
|-------------|-------------------|-----------------|-----------------|-----------------|
| <b>2060</b> | 17                | 2348            | 4449            | 7370            |
|             | 50                | 12235           | 11120           | 19304           |
|             | 83                | 27814           | 32562           | 41431           |
| <b>2100</b> | 17                | 3074            | 13871           | 35385           |
|             | 50                | 25213           | 51979           | 102537          |
|             | 83                | 83989           | 133172          | 229720          |
| <b>2150</b> | 17                | 3203            | 25823           | 95242           |
|             | 50                | 54055           | 135208          | 319098          |
|             | 83                | 193392          | 410361          | 924760          |

689

690 **Table 12:** Population exposure of each province at 17<sup>th</sup>, 50<sup>th</sup>, 83<sup>th</sup> percentile in 2060 and 2100 and three  
691 emission scenarios (SSP1-1.9, SSP2-4.5, SSP5-8.5).  
692

|           | 2060     |          |          | 2100     |          |          |
|-----------|----------|----------|----------|----------|----------|----------|
|           | SSP1-1.9 | SSP2-4.5 | SSP5-8.5 | SSP1-1.9 | SSP2-4.5 | SSP5-8.5 |
| Fujian    | 1029     | 1333     | 1915     | 2434     | 3953     | 7563     |
| Guangdong | 41645    | 46282    | 69096    | 95388    | 209064   | 383643   |
| Guangxi   | 1403     | 1859     | 4075     | 6935     | 27076    | 60331    |
| Hainan    | 898      | 1105     | 2420     | 4437     | 20218    | 35728    |
| Hebei     | 1497     | 1570     | 3269     | 4103     | 9517     | 24464    |
| Jiangsu   | 29854    | 32414    | 51192    | 64065    | 111890   | 215648   |
| Liaoning  | 1973     | 2129     | 3509     | 4206     | 8379     | 17439    |
| Shandong  | 3157     | 3295     | 5872     | 7059     | 13393    | 25827    |
| Shanghai  | 1356     | 1442     | 2003     | 2611     | 4456     | 11035    |
| Taiwan    | 1723     | 1841     | 3008     | 3956     | 6396     | 11133    |
| Tianjin   | 3150     | 3296     | 4953     | 5935     | 14187    | 40793    |
| Hong Kong | 730      | 1204     | 1663     | 1936     | 4251     | 6904     |
| Zhejiang  | 1900     | 2056     | 3208     | 3998     | 6733     | 14875    |
| Total     | 90315    | 99826    | 156183   | 207063   | 439513   | 855383   |

693

694

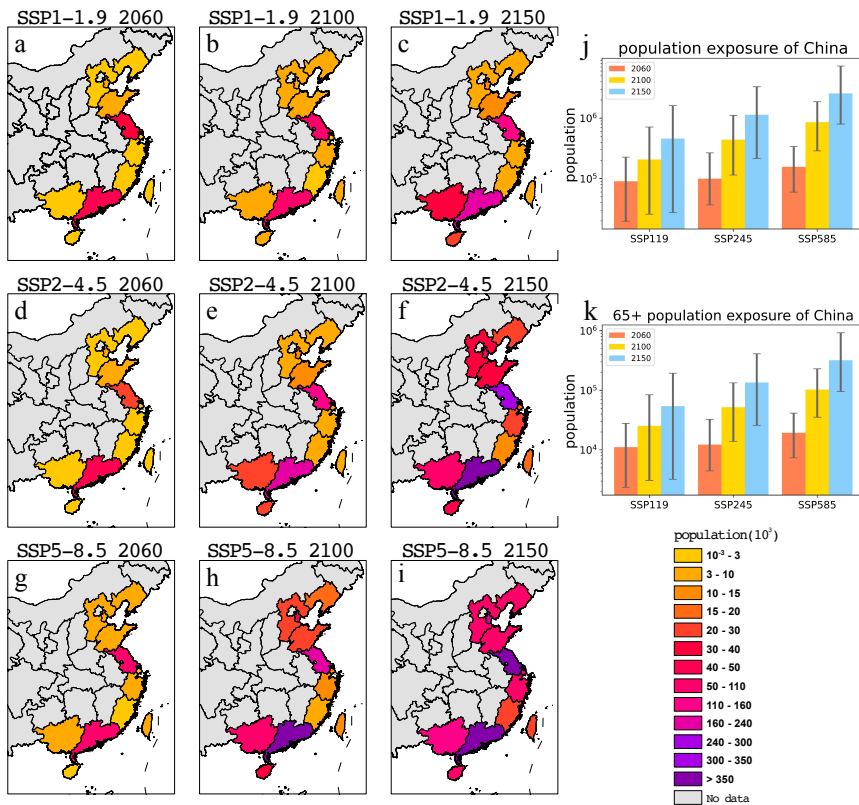

695

696 **Figure 20. Median estimation of population living in coastal areas below future RSL in provinces of**



697  
698  
699  
700  
701

## China

(a-i), the sum of population in these coastal areas for all-age groups (j) and age group over 65 years old (k) in 2060, 2100, and 2150 and 3 greenhouse-gas emissions: SSP1-1.9, SSP2-4.5, and SSP5-8.5. Error bars in j and k indicate the likely range (17th-83th percentile) of estimation.

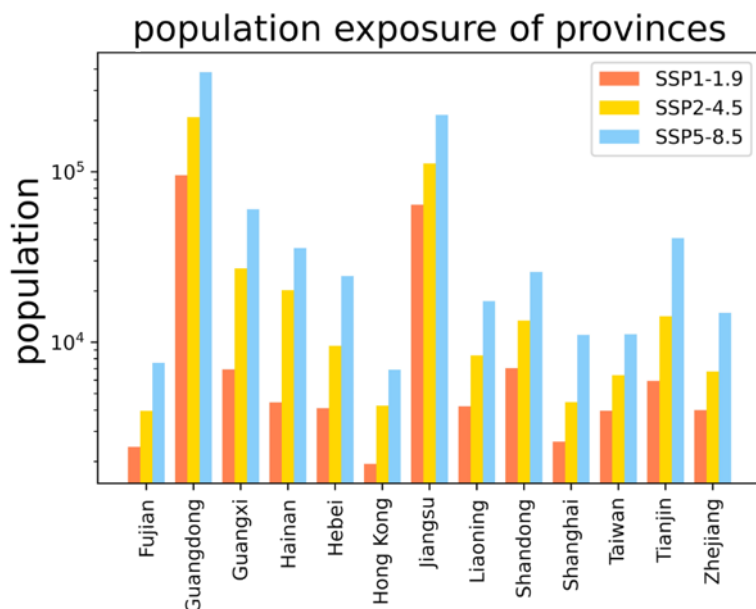

702  
703  
704  
705  
706

**Figure 21.** Median estimation of population exposure to regional sea level rise in each province along Chinese coast in 2100 under 3 different scenarios: SSP1-1.9, SSP2-4.5, SSP5-8.5

## Section 2: Adaptation, planning, and resilience for health

### Indicator 2.1: Adaptation planning and assessment

#### Indicator 2.1.1: National level adaptation planning and assessment

The methodology for this indicator has been improved from the 2021 China Lancet Countdown report appendix. A mixed approach, including qualitative analysis of national government documents and national assessment reports related to climate change response and a nation-wide China Health and Climate Change Survey for quantitative analysis, was applied for this indicator this year. Both document review and quantitative survey will continue to be conducted annually.

716

Government documents were searched on the websites of the State Council of PRC, the National Development and Reform Commission, the National Health Commission of PRC *etc.*, and search

719 covered keywords related to climate change, health, adaptation, vulnerabilities, and response *etc.* In  
720 addition, we searched government documents relevant to climate change and the health of older  
721 populations. All the documents were read through and relevant contents/sections related to climate  
722 change and health adaptations were mainly reviewed to qualitatively summarize the national planning  
723 findings. The following national government documents were identified as highly relevant:

- 724 • The State Council of the People’s Republic of China, China's policies and actions to respond to  
725 climate change (white paper) (in Chinese). 2021<sup>42</sup>.
- 726 • Ministry of Ecology and Environment of the People’s Republic of China, National Climate Change  
727 Adaptation Strategy 2035 (in Chinese). 2022<sup>43</sup>.
- 728 • National Health Commission of the People’s Republic of China and fourteen other ministries, The  
729 14th Five-Year Plan on Healthy Ageing (in Chinese), 2022<sup>44</sup>.

730 National reports and documents on assessments of climate change impacts, vulnerability, and adaptation  
731 for health released since the year 2020 were also systematically searched. The series of reports, “Climate  
732 and Environmental Evolution in China”, “The National Assessment Report on Climate Change”, and  
733 “Green Book of Climate Change-Annual Report on Actions to Address Climate Change” were mainly  
734 reviewed to qualitatively summarize the national assessment findings.

735 The quantitative data for this indicator included a voluntary national online survey, the China Health and  
736 Climate Change Survey, which was designed by referring to the 2021 WHO Health and Climate Change  
737 Country Survey<sup>49</sup>. The survey items related to adaptation assessment mainly include assessment of  
738 health impacts, vulnerability, and adaptation, impacts of assessment results on health services policy etc.  
739 In the WHO survey, impacts, vulnerability and adaptation assessments for health is a single assessment.  
740 However, in our survey we differentiated it as three stages of assessments to get more detailed  
741 information on progress in each province. Otherwise, some of the respondents might report no  
742 assessments completed even if they actually finished one or two of the assessments.

743 Focus group discussions and key informant consultations were operated to ensure the validation of the  
744 questionnaire. The survey was sent to the provincial centers for Disease Control and prevention in all 31  
745 provinces / districts / cities in Chinese Mainland at the end of June 2022, of which 20 completed the  
746 survey.

747 The English version of the questionnaire is shown below.

## 748 **2022 China health and climate change survey**

749 Dear Sir/Madam: Hello!

750 I am an investigator of the project "China Climate Change and Health ". We sincerely invite  
751 you to participate in this survey. The purpose of this survey is to track and understand the adaptation  
752 policies, measures and assessment of climate change health risks in China, and summarize the

753 progress, problems and challenges for climate change and health at China's national and provincial  
754 level, so as to provide reference for future policy formulation, implementation and climate change  
755 health adaptation.

756 Your truthful answers are very important to our research. The information you provide will  
757 be completely confidential. The completion and submission of this questionnaire indicates that you  
758 have informed consent to this survey.

759 Thank you again for your cooperation.

760

761 **Basic information of participants:**

762 Your name: \_\_\_\_\_

763 Your work sector: \_\_\_\_\_

764 Your workplace: \_\_\_\_\_

765 Your tel: \_\_\_\_\_

766 Your email: \_\_\_\_\_

767

768 **Part One: Institutional arrangement and management**

769

770 **1. Which ministry is responsible for climate change-related work in your province?**

771 **[Multiple choice] \***

772 A. Development and Reform Commission

773 B. Environmental Agency

774 C. Meteorological Bureau

775 D. Health Commission

776 E. Other \_\_\_\_\_ \*

777

778 **2. Which ministry is responsible for climate change and health-related work in your**  
779 **province? [Multiple choice] \***

780 A. Development and Reform Commission

781 B. Environmental Agency

782 C. Meteorological Bureau

783 D. Health Commission

784 E. Other \_\_\_\_\_ \*

785

786 **3. Does the CDC have a section in charge of climate change and health? [Multiple choice] \***

787 A. Yes (section name) \_\_\_\_\_ \*

788 B. No

789 C. Unclear

790 **If you answer "Yes", please answer 3.1**

791 3.1 How many full-time staff (or equivalent) are dedicated to health and climate change in  
 792 the Ministry of Health \_\_\_\_\_ [Fill in the blank] \*

793

794 **4. Is there a memorandum of understanding or other agreement between the health**  
 795 **department in your province and the following relevant departments in which a specific**  
 796 **division of work and responsibility for climate change and health is identified?**

| Health-determining sectors/ministries             | Yes                   | No                    | Unclear               |
|---------------------------------------------------|-----------------------|-----------------------|-----------------------|
| Development and Reform Commission                 | <input type="radio"/> | <input type="radio"/> | <input type="radio"/> |
| Agriculture                                       | <input type="radio"/> | <input type="radio"/> | <input type="radio"/> |
| Education                                         | <input type="radio"/> | <input type="radio"/> | <input type="radio"/> |
| Energy                                            | <input type="radio"/> | <input type="radio"/> | <input type="radio"/> |
| Environment                                       | <input type="radio"/> | <input type="radio"/> | <input type="radio"/> |
| Urban development/Housing                         | <input type="radio"/> | <input type="radio"/> | <input type="radio"/> |
| National meteorological and hydrological services | <input type="radio"/> | <input type="radio"/> | <input type="radio"/> |
| Transportation                                    | <input type="radio"/> | <input type="radio"/> | <input type="radio"/> |
| Other _____ *                                     | <input type="radio"/> | <input type="radio"/> | <input type="radio"/> |

797

## 798 **Part Two: Impact, Vulnerability and Adaptation Assessment**

799

800 **5. Has your province organized any assessment of the impact of climate change on**  
 801 **population health? \***

802 A. Province-wide

803 B. A few cities (list the names of the cities in which they are carried out) \_\_\_\_\_ \*

804 C. Under development

805 D. Not at all

806 E. Unclear

807 **If you answer "Province-wide" or "Individual cities", please answer 5.1**

808 5.1 In a recent evaluation, which health impacts were primarily assessed? [Multiple choice]

809 \*

810 A. Vector-borne diseases

811 B. Water-borne or food-borne diseases

- 812 C. Respiratory or cardiovascular morbidity or mortality
- 813 D. Heatwave related morbidity or mortality
- 814 E. Extreme events (flooding, typhoon, etc.) related injury or deaths
- 815 F. Malnutrition and food security
- 816 G. Women and children health
- 817 H. Mental health
- 818 I. Occupational health and labor capacity
- 819 J. Other health effects \_\_\_\_\_\*

820

821 **6. Has your province organized any vulnerability assessment of climate change and**

822 **population health risks? \***

- 823 A. Province-wide
- 824 B. A few cities (list the names of the cities in which they are carried out) \_\_\_\_\_ \*
- 825 C. Under development
- 826 D. Not at all
- 827 E. Unclear

828

829 **7. Has your province organized any adaptation assessment of climate change and**

830 **population health risks? \***

- 831 A. Province-wide
- 832 B. A few cities (list the names of the cities in which they are carried out) \_\_\_\_\_ \*
- 833 C. Under development
- 834 D. Not at all
- 835 E. Unclear

836 **If you have organized any of the above assessments 5-7, answer "Province-wide" or "A**

837 **few cities", please answer the following questions for each assessment.**

838

839 **Assessment 1**

840 7.1 Name of the assessment report [Fill in the blank] \* \_\_\_\_\_

841

842 7.2 Year in which the assessment was conducted [Fill in the blank] \* \_\_\_\_\_

843

844 7.3 Scope covered by the assessment [Multiple choice] \*

- 845 A. Climate change impact assessment on population health
- 846 B. Vulnerability assessment of climate change and health risks
- 847 C. Adaptation assessment of climate change and health risks

848

849 7.4 Specific populations considered in the assessment [Multiple choice] \*

- 850 A. Children

- 851 B. Women
- 852 C. Elderly (65 years old and above)
- 853 D. local population
- 854 E. Migrant workers
- 855 F. Poor people
- 856 G. Rural population
- 857 H. Urban/suburban population
- 858 I. Don't know
- 859 J. Other \_\_\_\_\_\*

860

861 7.5 How have the results of the assessment influenced the government's development of  
862 climate change and health plans/strategies? \*

- 863 A. Greater impact
- 864 B. There are some effects
- 865 C. Minimal impact
- 866 D. No effect
- 867 E. Unclear

868

869 7.6 How have the results of the assessment impacted health resource allocation (e.g.,  
870 increased staffing, financial support, etc.)? \*

- 871 A. Greater impact
- 872 B. There are some effects
- 873 C. Minimal impact
- 874 D. No effect
- 875 E. Unclear

876

877 7.7 Please upload the assessments reports [Upload File] \*

878

879 7.8 Are there any other assessments to report? [Single-choice] \*

- 880 A. Yes
- 881 B. No

882

### 883 **Part Three: Adaptation plans and actions**

884

885 **8. Has your province developed or implemented policies or action plans to address the**  
886 **health risks of climate change? [Multiple choice]\***

- 887 A. Province-wide

888 B. A few cities (list the names of the cities in which they are carried out) \_\_\_\_\_

889 \*

890 C. Under development

891 D. Not at all

892 E. Unclear

893 **If you answer "Province-wide" or "A few cities", please answer the following questions**  
894 **for each assessment.**

895

896 **Policy 1**

897 8.1 Name of the policy measure/action plan implemented or the name of the document  
898 issued [Fill in the blank] \* \_\_\_\_\_

899

900 8.2 Year covered by policy measures/action plans [Fill in the blank]  
901 \* \_\_\_\_\_

902

903 8.3 Is there a budget and staffing required for the policies/action plans? \*

904 A. Yes

905 B. No

906 C. I don't know

907

908 8.4 Has the policies/action plan received government funding support? \*

909 A. Yes

910 B. No

911 C. Unclear

912

913 8.5 Is the progress of the policies/action plans monitored? \*

914 A. With monitoring

915 B. No monitoring

916 C. Unclear

917

918 8.6 Please upload the policies/action plans [Upload file] \*

919

920 8.7 Are there any other policies/measures that need to be reported? \*

921 A. Yes

922 B. No

923

924 **9. Are there other work plans in your province that address climate change and health risk**  
925 **response\***

926 A. Yes, (please list the specific program name) \_\_\_\_\_ \*

927 B. No

928 C. I don't know

929

930 **10. What do you think are the main challenges in your province in addressing the health**  
931 **risks of climate change? [Multiple choice] \***

932 A. Poor awareness of government

933 B. Insufficient scientific understanding of the health risks of climate change

934 C. Unclear responsible department or leading sector

935 D. Lack of a mechanism for multi-sectoral cooperation

936 E. Government funding deficiency

937 F. Short of health workforce resources

938 G. Inadequate primary healthcare capacities

939 H. Incomplete national surveillance system

940 I. Insufficient risk monitoring and assessment technologies

941 J. Lack of comprehensive response plan/strategy

942 K. Other \_\_\_\_\_ \*

943

944 **11. Has the outbreak of the global novel coronavirus pneumonia (COVID-19) epidemic**  
945 **contributed to your province's consideration of the impact of climate change in health-**  
946 **related efforts? \***

947 A. Yes

948 B. No

949 C. Unclear

950 **If you answer "Yes", please answer 11.1.**

951 11.1 Specifically, in which work are the health effects of climate change primarily  
952 considered [Fill in the blank] \_\_\_\_\_



953

954 **12. Has the development of a dual carbon (carbon peaking, carbon neutral) strategy**  
955 **contributed to your province's consideration of climate change impacts in health-related**  
956 **efforts? \***

957 A. Yes

958 B. No

959 C. Unclear

960 **If you answer "Yes", please answer 12.1**

961 12.1 Specifically, in which work are the health effects of climate change primarily  
962 considered [Fill in the blank] \_\_\_\_\_

963

**Part Four: Risk monitoring/early warning**

964

965

966 **13. For the following climate-sensitive health outcomes, please indicate: whether there is a**  
967 **relevant disease surveillance system; whether the surveillance system includes**  
968 **meteorological information**

|                                                                                 | Is there a relevant disease surveillance system? | Does the monitoring system include meteorological information? |
|---------------------------------------------------------------------------------|--------------------------------------------------|----------------------------------------------------------------|
| Morbidity or mortality from respiratory or cardiovascular disease               |                                                  |                                                                |
| Illness or death due to high temperature heat waves                             |                                                  |                                                                |
| Injuries or deaths caused by extreme weather events such as floods and typhoons |                                                  |                                                                |
| Malnutrition and food security                                                  |                                                  |                                                                |

|                                  |  |  |
|----------------------------------|--|--|
| Maternal and Child Health        |  |  |
| Spiritual and Mental Health      |  |  |
| Arboviral diseases               |  |  |
| Waterborne or foodborne diseases |  |  |
| Zoonotic diseases                |  |  |

969

970 **14. Has the meteorological department in your province provided meteorological**  
 971 **information services to health care departments or agencies? \***

972 A. Yes

973 B. No

974 C. Unclear

975 **If you answer "Yes", please answer 14.1-14.2**

976 14.1 Please check which meteorological information related to population health has  
 977 been provided. [Multiple choice] \*

978 A. Temperature

979 B. Precipitation

980 C. Humidity

981 D. Wind

982 E. Disaster meteorological events (typhoons, dust storms, etc.)

983 F. Air quality

984 G. Ultraviolet light

985 H. Other \_\_\_\_\_ \*

986

987 14.2 Does your province use these meteorological information services to guide decision  
 988 making in health care? \*

989 A. Yes, (please give a brief example) \_\_\_\_\_ \*

990 B. No

991 C. Unclear

992

993

15. For the following extreme weather and climate events, please indicate: whether your

994

province has an early warning for extreme weather and climate events; and whether the

995

health sector has a response plan/program.

996

**Heat Wave \***

|                                                          | Yes                   | No                    | No idea               |
|----------------------------------------------------------|-----------------------|-----------------------|-----------------------|
| Is there early warning in your province?                 | <input type="radio"/> | <input type="radio"/> | <input type="radio"/> |
| Does the health department have a response plan/program? | <input type="radio"/> | <input type="radio"/> | <input type="radio"/> |

997

998

**If you answer "Yes", please upload a health sector response plan for the heat wave [Upload**

999

**file] \***

1000

1001

**Cold spell \***

|                                                          | Yes                   | No                    | No idea               |
|----------------------------------------------------------|-----------------------|-----------------------|-----------------------|
| Is there early warning in your province?                 | <input type="radio"/> | <input type="radio"/> | <input type="radio"/> |
| Does the health department have a response plan/program? | <input type="radio"/> | <input type="radio"/> | <input type="radio"/> |

1002

1003

**If you answer "Yes", please upload the health department response plan for the cold snap**

1004

**[Upload file] \***

1005

1006

**Extreme precipitation/Flooding \***

|                                          | Yes                   | No                    | No idea               |
|------------------------------------------|-----------------------|-----------------------|-----------------------|
| Is there early warning in your province? | <input type="radio"/> | <input type="radio"/> | <input type="radio"/> |

|                                                          |                       |                       |                       |
|----------------------------------------------------------|-----------------------|-----------------------|-----------------------|
| Does the health department have a response plan/program? | <input type="radio"/> | <input type="radio"/> | <input type="radio"/> |
|----------------------------------------------------------|-----------------------|-----------------------|-----------------------|

1007

1008

**If you answer "Yes", please upload a health sector response plan for extreme precipitation/flooding [Upload file] \***

1009

1010

1011

**Drought \***

|                                                          | Yes                   | No                    | No idea               |
|----------------------------------------------------------|-----------------------|-----------------------|-----------------------|
| Is there early warning in your province?                 | <input type="radio"/> | <input type="radio"/> | <input type="radio"/> |
| Does the health department have a response plan/program? | <input type="radio"/> | <input type="radio"/> | <input type="radio"/> |

1012

1013

**If you answer "Yes", please upload a health sector response plan for the drought [Upload file] \***

1014

1015

1016

**Hurricane/Typhoon \***

|                                                          | Yes                   | No                    | No idea               |
|----------------------------------------------------------|-----------------------|-----------------------|-----------------------|
| Is there early warning in your province?                 | <input type="radio"/> | <input type="radio"/> | <input type="radio"/> |
| Does the health department have a response plan/program? | <input type="radio"/> | <input type="radio"/> | <input type="radio"/> |

1017

1018

**If you answer "Yes", please upload health sector response plans for hurricanes/typhoons, etc. [Upload file] \***

1019

1020

1021

**16. Has the health sector conducted a province-wide awareness or science campaign on climate change and health to enhance public understanding of the issue? \***

1022

1023

A. Yes

1024

B. No

1025

C. I don't know

1026

1027 **17. What are the main ways your answers come from? [Multiple choice] \***

1028 A. Responsible for related work by yourself

1029 B. Heard from a colleague

1030 C. Learned in lectures/conferences

1031 D. Read related documents

1032 E. Other \_\_\_\_\_ \*

1033

1034 **Data**

1035 1. National reports and documents on adaptation planning and assessment of climate change impacts,  
1036 vulnerability, and adaptation to health were retrieved from government websites or databases as  
1037 described above.

1038 2. Data on provincial adaptation planning and assessment for health were obtained from the nationwide  
1039 online voluntary survey targeted on both provincial CDCs and Health Commission conducted by  
1040 Sun Yat-sen University at the end of June 2022.

1041 **Caveats**

1042 The national online survey related to climate change and health adaptations was conducted in China for  
1043 the third time in 2022. A total of 20 provinces and municipalities (including Anhui, Gansu, Guangdong,  
1044 Guangxi, Hainan, Heilongjiang, Henan, Hubei, Hunan, Inner Mongolia, Jiangsu, Jiangxi, Ningxia,  
1045 Qinghai, Shandong, Sichuan, Tianjin, Xinjiang, Yunnan, and Zhejiang) have participated in this survey.  
1046 It was completed by the provincial Centers for Diseases Control and Prevention in the  
1047 provinces/regions/municipalities in mainland China, which might only reflect the adaptation plans from  
1048 local governments' perspectives.  
1049

1050 **Future Form of Indicator**

1051 National reports and documents on climate change and adaptation plans for health will continue to be  
1052 searched and reviewed annually. The China Health and Climate Change Survey will also be conducted  
1053 annually and will continue to be the primary source of data to track this indicator 2.1.1. The survey tool  
1054 could be improved in the future, in terms of the stricter validation of the detailed response.

1055 **Additional Information**

1056 The State Council Information Office published white paper entitled China's Policies and Actions on  
1057 Climate Change in October 2021<sup>42</sup>. The document proposed establishment of regional heat-health early  
1058 warning systems for improving public's ability to adapt to climate change. National Climate Change  
1059 Adaptation Strategy 2035<sup>43</sup> lunched in 2022 includes a subsection on health, and emphasized action  
1060 related to climate-health issues. Meanwhile, for the first time, the Healthy China Action Promotion  
1061 Committee explicitly mentioned "promoting actions to address health impacts of climate change" in its  
1062 annual work priorities in 2022, reflecting the increased awareness of the links between climate change  
1063 and health in the healthcare sector.

1064

1065 In recent years, the national reports on climate change had involved health as a part of the assessment.  
1066 For example, health had been included as a single chapter in the report of "Climate and Environmental  
1067 Evolution in China: 2021"<sup>45</sup>.

1068

1069 In terms of an adaptation assessment of the health risks of climate change, Guangdong province reported  
1070 that a comprehensive, province-wide assessment of the health effects, vulnerability, and adaptation to  
1071 climate change has been conducted. In other provinces, they stated the assessment was conducted in a  
1072 few cities, such as Nanjing city in Jiangsu province, Jinan city and Qingdao city in Shandong province,  
1073 Urumqi city in Xinjiang province, and Ningbo city in Zhejiang province (*Figure 21*).

1074

1075 Of the 20 provinces surveyed, Guangdong province reported that health and climate change adaptation  
1076 plans or measures had been developed at the provincial level. In 2022, Guangdong province issued the  
1077 "14th Five Year Plan of Guangdong Province to Address Climate Change". Three provinces (Henan,  
1078 Inner Mongolia, and Sichuan) reported that they were developing related adaptation plans (*Figure 22*).  
1079 In this survey, although eleven provinces (Anhui, Gansu, Guangdong, Guangxi, Henan, Hunan, Inner  
1080 Mongolia, Jiangsu, Shandong, Xinjiang, and Yunnan) stated that provincial health departments and  
1081 meteorological departments are working closely together in health and climate change adaptation plans  
1082 and strategies, meteorological information was also provided to the health departments by the  
1083 meteorological departments. However, only seven provinces (Gansu, Guangdong, Henan, Jiangsu,  
1084 Shandong, Xinjiang, and Yunnan) stated they used meteorological information to guide health decision  
1085 making (*Figure 23*). The survey found that the lack of government funding support (70%), the lack of a  
1086 mechanism for multi-sectoral cooperation (65%), and the lack of risk monitoring and assessment  
1087 technologies (65%) were major challenges in addressing the health risks of climate change (*Figure 24*).

1088

1089 Most provinces (except for Qinghai province) stated they have climate-sensitive disease surveillance  
1090 systems in place. Water-borne or food-borne diseases (80%), respiratory or cardiovascular morbidity or  
1091 mortality (75%), and vector-borne diseases (75%) are the most monitored diseases. However, few  
1092 systems incorporate meteorological information (*Figure 25*). Except for Gansu, Hainan, Heilongjiang,  
1093 Qinghai, and Sichuan, other provinces have established early warning systems for at least one extreme  
1094 weather event, such as extreme precipitation or flooding (65%), cold spell (55%), and heat wave (55%),

1095 but they still lack response plans or programs to address extreme weather related health risks (*Figure*  
 1096 **26**).  
 1097

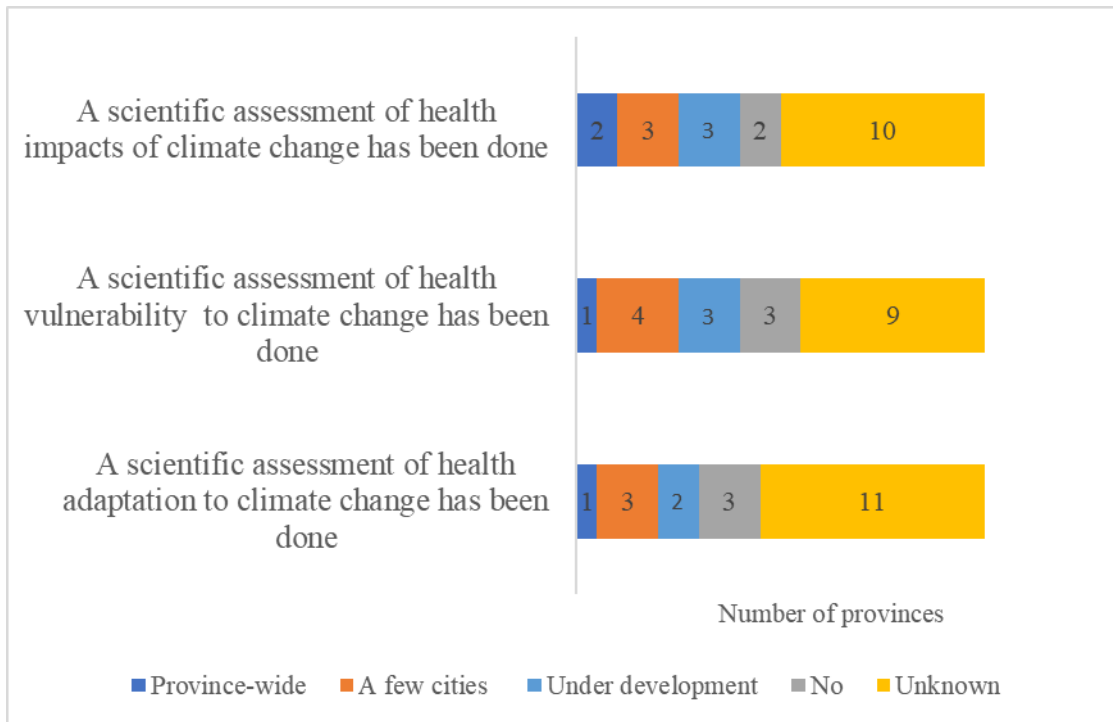

1098  
 1099 **Figure 22: Number of provinces with a scientific assessment of climate change impacts,**  
 1100 **vulnerability, and adaptation for health**  
 1101

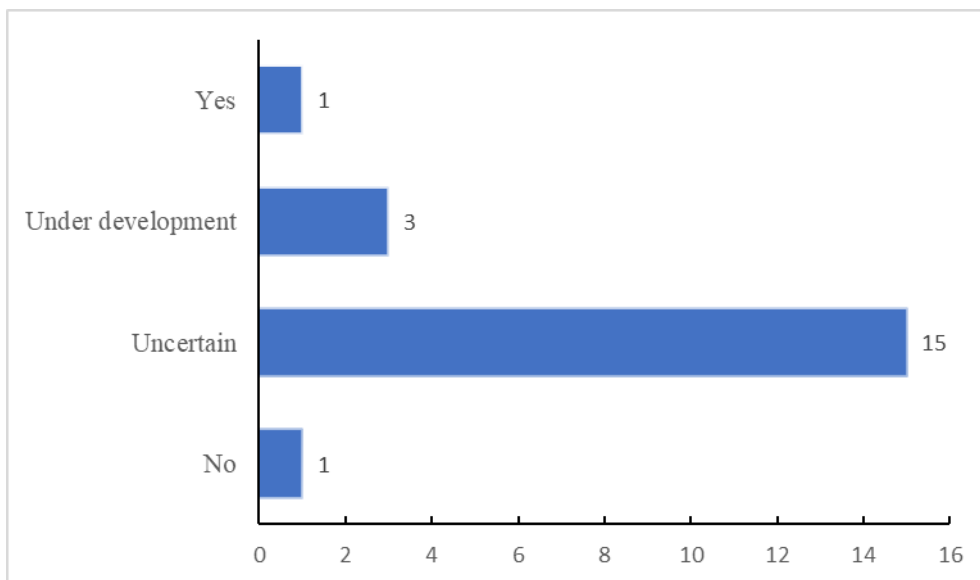

1102  
 1103 **Figure 23: Number of provinces declared policies implementation to deal with the health risks of**  
 1104 **climate change**

1105  
 1106

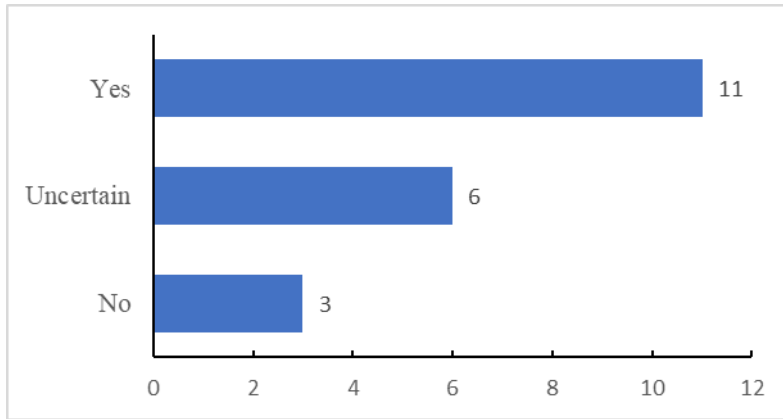

1107

1108

1109

1110

**Figure 24: Number of provinces declared health department collaborating with the meteorological department to tackle the health risks of climate change**

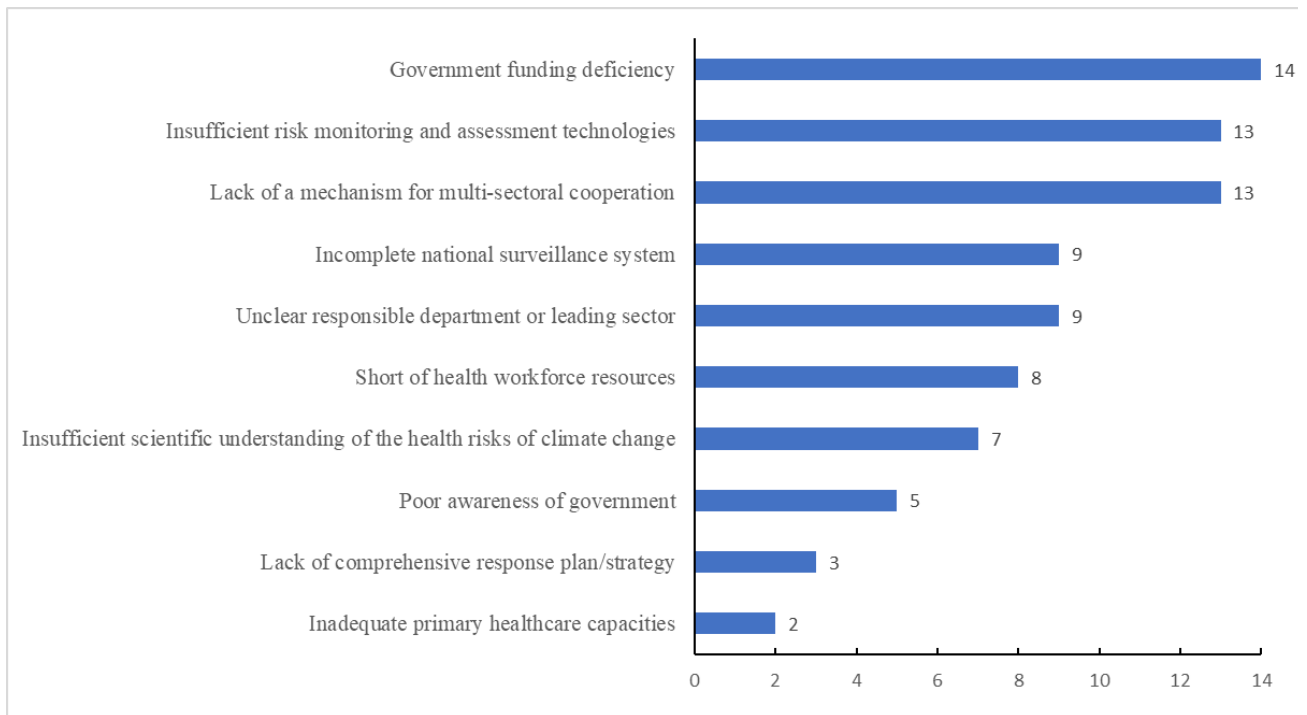

1111

1112

1113

**Figure 25: The main challenges in addressing the health risks of climate change**



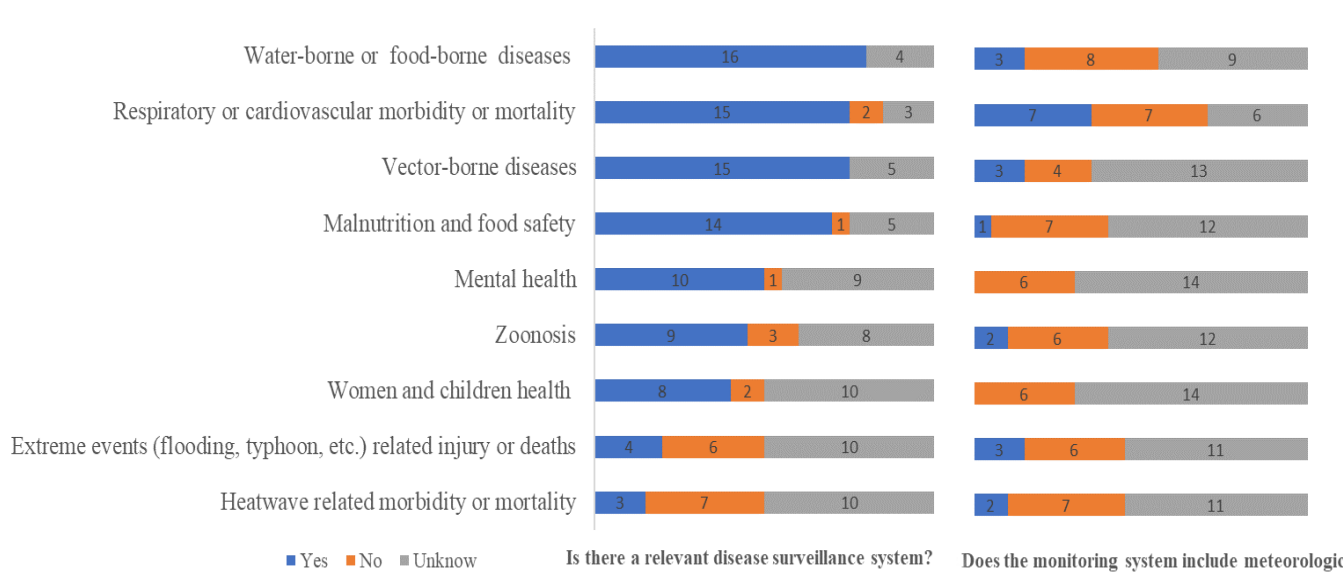

1114  
1115  
1116

**Figure 26: The number of provinces with climate sensitive disease surveillance systems**

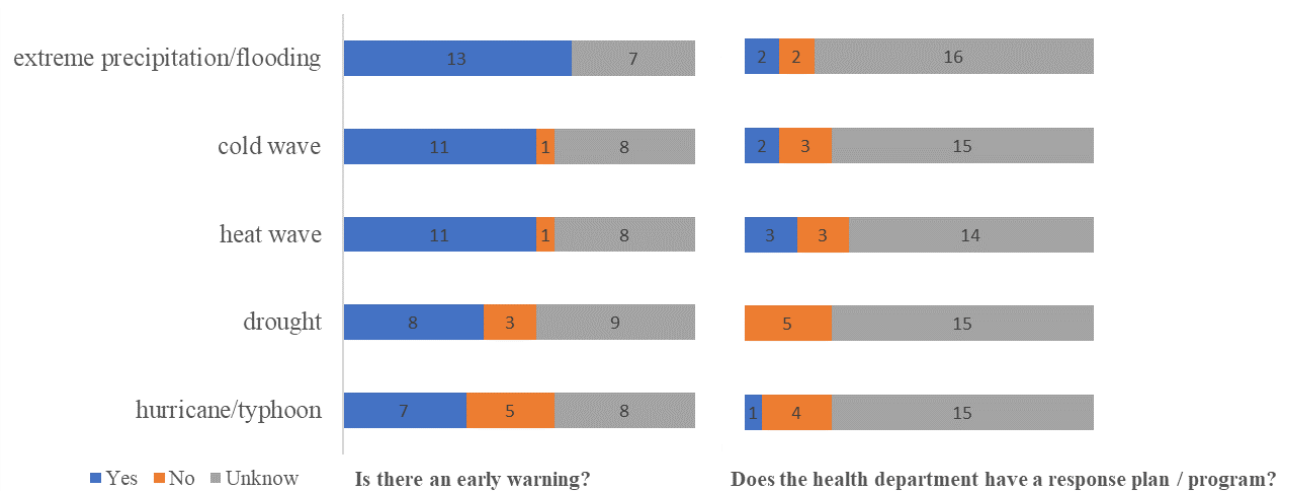

1117  
1118  
1119

**Figure 27: The number of provinces with early warning systems for extreme weather events**

1120 **Indicator 2.1.2 City-level climate change risk assessments**

1121 **Methods**

1122 An indicator was developed to measure the proportion of provinces with at least one city that has  
1123 conducted or are conducting climate change risk or vulnerability assessments. The data were derived  
1124 from the CDP Annual Cities Survey and the Annual Provincial Survey on Climate Change  
1125 Assessment and Information Services. The latter was carried out by the authors who are responsible  
1126 for this indicator.

1127  
1128

In 2021, 19 cities responded to questions on climate change risk or vulnerability assessments in the

1129 CDP Annual Cities Survey, including 9 from 7 provinces in mainland China, 9 cities from Taiwan  
1130 Province, and Hong Kong.

1131

1132 The annual survey targeting provincial meteorological departments started for the 2021 report. In  
1133 2022, provincial meteorological departments in all 31 provinces in mainland China were invited to  
1134 participate in this year's survey, and 29 responded. Hainan and Sichuan did not participate in the  
1135 survey. The questions on city-level climate change risk or vulnerability assessments are consistent  
1136 with the related questions in the CDP Annual Cities Survey.

1137

1138 The information of Macao is based on The People's Republic of China Third National  
1139 Communication on Climate Change. The part of basic information of Macao SAR on addressing  
1140 climate change shows the information of climate change impact assessment undertaken by the  
1141 Macao SAR Government.

1142

1143 All these data sources were combined to reach the final results. As not all the respondents in the  
1144 annual survey for provincial meteorological departments were responsible for the related work, for  
1145 provinces with available results from the CDP survey, the CDP survey results prevailed. The results  
1146 for some provinces from the 2022 survey for provincial meteorological departments were not  
1147 consistent with those from the 2021 survey.

1148

#### 1149 **Data**

1150 1. CDP Annual Cities Survey<sup>46</sup>

1151 2. Annual Provincial Survey on Climate Change Assessment and Information Services

1152 3. The People's Republic of China Third National Communication on Climate Change<sup>47</sup>

1153

#### 1154 **Caveats**

1155 Only a small portion of Chinese cities participated in the CDP Annual Cities Survey. It made the  
1156 first sub-indicator lack representativeness, though more cities in mainland China participated in  
1157 2020 than in 2019.

1158

1159 The annual survey targeting provincial meteorological departments is established on the  
1160 collaborative relationships between the authors and the provincial meteorological departments  
1161 rather than an official top-down mode.

1162

1163 Although for most provinces, the provincial meteorological bureaus were surveyed, for several  
1164 provinces, the meteorological bureaus of the capital or major cities were surveyed instead due to the  
1165 lack of contact with the corresponding provincial meteorological bureaus.

1166

1167 The authors tried best to look for people in charge of climate change assessment and adaptation in  
1168 the meteorological departments to answer the questions, but it is unlikely to ensure that the actual  
1169 respondents completely grasp the progress of city-level climate change risk assessments in their  
1170 provinces.

1171

#### 1172 **Future Form of Indicator**

1173 The author team of the China report of the Lancet Countdown on health and climate change will  
1174 seek for chances of official surveys led by the central government at the provincial level and even  
1175 at the city level in the future and enrich the questionnaire content to investigate more details.

1176

1177 The author team will also organize a workshop for the annual survey next year. Provincial  
1178 meteorological bureaus from all provinces will be invited to join the workshop, in which they will  
1179 be informed of the objectives of the report and the scope of the survey. All the bureaus will be given  
1180 more time to finish the questionnaire.

1181

## 1182 **Findings**

1183 *Headline finding: In 21 out of 34 provinces, there was at least one city with a climate change risk*  
1184 *or vulnerability assessment undertaken or being undertaken in 2021.*

1185 There have been two rounds of official climate change assessments for regions in China with  
1186 provinces involved, but city-level assessments are being developed in cities' own ways. Cities play  
1187 a main role in taking measures for climate adaptation. According to the Cities Annual Survey by the  
1188 Carbon Disclosure Project and the annual survey for provincial meteorological bureaus, 21  
1189 provinces had completed or ongoing city-level climate change risk or vulnerability assessments in  
1190 2021 with three more relative to 2020. Provinces in Northern China are still behind.

1191

## 1192 **Additional information**

1193 In 2022, the 21 provinces with city-level climate change risk assessments included Anhui, Beijing,  
1194 Chongqing, Fujian, Gansu, Guangdong, Guangxi, Guizhou, Henan, Hubei, Hunan, Jiangsu,  
1195 Shandong, Shanghai, Sichuan, Tianjin, Xinjiang, Zhejiang, Hong Kong, Taiwan, and Macao.  
1196 Compared with 2021, the three more provinces were Hunan, Shanghai, and Tianjin.

1197

1198 There have been two rounds of regional climate change assessment reports in China<sup>48,49</sup>. The eight  
1199 regions are Northeast China, North China, Northwest China, East China, Central China, South  
1200 China, Southwest China, and Xinjiang. The two rounds were completed in 2014 and 2020,  
1201 respectively.

1202

1203

## 1204 **Indicator 2.2: Adaptation delivery and implementation**

### 1205 **Indicator 2.2.1: Detection, preparedness, and response to health emergencies**

## 1206 **Methods**

1207 This indicator reflects the situation of public health emergency management in 2020 in this report. The  
1208 methodology for this indicator has been succeeded and improved from the 2020 China Lancet  
1209 Countdown report. A comprehensive index system was built, using Entropy Weigh Method (EWM), to  
1210 track the ability of provinces to detect and rapidly respond to public health emergencies, covering disease  
1211 outbreaks, mass illness of unknown origin, serious food and occupational poisoning and other

1212 emergencies that jeopardise public health, including the climate-sensitive diseases and medical rescue  
 1213 caused by climate-related extreme events.

1214 The index system includes three dimensions: risk exposure and preparedness, detection and response,  
 1215 resource support and social participation. The three dimensions are divided into six second-level  
 1216 indicators and 20 third-level indicators, among which two were replaced. First, according to the data  
 1217 from Chinese Center for Disease Control and Prevention, the construction rate of Infectious Disease  
 1218 Surveillance Reporting System has been reaching 100% in every province. The indicator D&R 1.1,  
 1219 therefore, was replaced by ‘number of CDCs per 1,000 population’. Second, the indicator RS&SP 2.2  
 1220 was changed into ‘percentage of social expenditures in the medical and health sector out of local GDP’  
 1221 instead of ‘number of private non-enterprises in the health sector’, due to the update of statistic scale of  
 1222 China Civil Affairs’ Statistics Yearbook, which has been compiled by the Ministry of Civil Affairs of the  
 1223 PRC since 1990.

1224 In order to focus on the performance of every province dealing with COVID-19 pandemic, an extensional  
 1225 module with four more dynamic third-level indicators was added to the fundamental index system, which  
 1226 include ‘D&R COVID 1.1: Information release level on public health emergencies’, ‘D&R COVID 2.1:  
 1227 System robustness of personal health code’, ‘D&R COVID 2.2: Average period of dynamic clearing of  
 1228 COVID-19 cases’, and ‘RS&SP COVID 1.1: Number of nucleic acid detection sites per 1,000  
 1229 population’. The EWM is also applied to these indicators to calculate the relative weights. All indicators  
 1230 of the index system are listed as follows and the weights of fundamental indicators sum up to 100%.

1231

1232 **Table 13: The indicators of the provincial comprehensive health emergencies management ability**  
 1233 **index system**

| First-level Indicators                                                                                                                                    | Second-level Indicators                                                                                                                                            | Third-level Indicators                                                                            | Index weights / % |
|-----------------------------------------------------------------------------------------------------------------------------------------------------------|--------------------------------------------------------------------------------------------------------------------------------------------------------------------|---------------------------------------------------------------------------------------------------|-------------------|
| Risk Exposure and Preparedness(RE&P): the degree of risk faced by the provinces in the health environment and the work done about emergency preparedness. | RE&P 1: Health emergency environmental risks: the health risks due to population mobility and risk management of the provinces.                                    | RE&P 1.1: Proportion of cities identifies as National Health Cities                               | 7.190             |
|                                                                                                                                                           |                                                                                                                                                                    | RE&P 1.2: Urban population density                                                                | 3.831             |
|                                                                                                                                                           |                                                                                                                                                                    | RE&P 1.3: Percentage of migrant population                                                        | 1.970             |
|                                                                                                                                                           |                                                                                                                                                                    | RE&P 1.4: Passenger traffic volume                                                                | 2.767             |
|                                                                                                                                                           |                                                                                                                                                                    | RE&P 1.5: Number of port entry personnel                                                          | 0.908             |
|                                                                                                                                                           | RE&P 2: Health emergency preparedness: the health emergency preparedness of the provinces, in terms of emergency planning, emergency space, and fiscal investment. | RE&P 2.1: Completeness of normative documents for public health emergencies                       | 5.501             |
|                                                                                                                                                           |                                                                                                                                                                    | RE&P 2.2: Construction space for emergency facilities per capita                                  | 6.307             |
|                                                                                                                                                           |                                                                                                                                                                    | RE&P 2.3: Percentage of medical and health expenditure out of total government public expenditure | 4.858             |
| Detection and Response(D&R): the ability for infectious                                                                                                   | D&R 1: Health emergency detection and early warning: the ability for infectious diseases                                                                           | D&R 1.1: Number of CDCs per 1,000 population                                                      | 11.993            |
|                                                                                                                                                           |                                                                                                                                                                    | D&R 1.2: Availability rate of 4G mobile                                                           | 4.674             |

|                                                                                                                                                                               |                                                                                                                           |                                                                                                |        |
|-------------------------------------------------------------------------------------------------------------------------------------------------------------------------------|---------------------------------------------------------------------------------------------------------------------------|------------------------------------------------------------------------------------------------|--------|
| diseases detection and early warning of the provinces, and the health emergency response ability from the perspective of results.                                             | detection and early warning of the provinces from the perspective of information construction.                            | phone                                                                                          |        |
|                                                                                                                                                                               |                                                                                                                           | D&R COVID 1.1: Information release level on public health emergencies                          | 5.924  |
|                                                                                                                                                                               | D&R 2: Health emergency response: the management and response to infectious diseases of the provinces.                    | D&R 2.1: Incidence of category A and B infectious diseases                                     | 10.726 |
|                                                                                                                                                                               |                                                                                                                           | D&R 2.2: Death rate of category A and B infectious diseases                                    | 5.941  |
|                                                                                                                                                                               |                                                                                                                           | D&R COVID 2.1: System robustness of personal health code                                       | 9.097  |
| D&R COVID 2.2: Average period of dynamic clearing of COVID-19 cases                                                                                                           | 8.790                                                                                                                     |                                                                                                |        |
| Resource Support and Social Participation(RS&SP): the ability to guarantee medical services and the degree of participation of social forces in health care of the provinces. | RS&SP 1: Medical service and resource support: the condition of medical resources and material supplies of the provinces. | RS&SP 1.1: Number of hospitals per 1,000 population                                            | 1.083  |
|                                                                                                                                                                               |                                                                                                                           | RS&SP 1.2: Number of primary health care institutions per 1,000 population                     | 2.191  |
|                                                                                                                                                                               |                                                                                                                           | RS&SP 1.3: Number of beds in medical and health institutions per 1,000 population              | 0.248  |
|                                                                                                                                                                               |                                                                                                                           | RS&SP 1.4: Number of practicing and assistant doctors per 1,000 population                     | 0.335  |
|                                                                                                                                                                               |                                                                                                                           | RS&SP 1.5: Number of registered nurses per 1,000 population                                    | 0.342  |
|                                                                                                                                                                               |                                                                                                                           | RS&SP 1.6: Production capacity of pharmaceutical manufacturing industry                        | 12.467 |
|                                                                                                                                                                               |                                                                                                                           | RS&SP COVID 1.1: Number of nucleic acid detection sites per 1,000 population                   | 5.787  |
|                                                                                                                                                                               | RS&SP 2: Health emergency social participation: the participation of stakeholders in health emergencies.                  | RS&SP 2.1: Percentage of registered volunteers                                                 | 7.316  |
|                                                                                                                                                                               |                                                                                                                           | RS&SP 2.2: Percentage of social expenditures in the medical and health sector out of local GDP | 9.351  |

1234

1235

The contents and calculation methods of the indicators are described as follows.

1236

**Fundamental Capability Indicators:**

1237

- *RE&P 1.1: Proportion of cities identified as National Health Cities:* This indicator is measured by the ratio of the number of National Health Cities in one province to the total number of cities in the province. The National Health City is a national selection carried out every year by Bureau of Disease Control and Prevention, National Health Commission of the PRC.

1238

1239

1240

1241

- *RE&P 1.2: Urban population density:* Urban population density is relevant to the risk of disease spread. It was obtained from China Urban and Rural Construction Statistical Yearbook.

1242

1243

- *RE&P 1.3: Percentage of migrant population:* The percentage of migrant population reflects the risk level of imported infectious diseases and affect community resilience to emergencies.

1244

1245

- It was obtained from Migrant Population Data Platform, which is an online database provided by Migrant Population Service Center, National Health Commission of the PRC.

1246

- 1247
- 1248
- 1249
- 1250
- 1251
- 1252
- 1253
- 1254
- 1255
- 1256
- 1257
- 1258
- 1259
- 1260
- 1261
- 1262
- 1263
- 1264
- 1265
- 1266
- 1267
- 1268
- 1269
- 1270
- 1271
- 1272
- 1273
- 1274
- 1275
- 1276
- 1277
- 1278
- 1279
- 1280
- 1281
- 1282
- 1283
- 1284
- 1285
- 1286
- 1287
- 1288
- 1289
- *RE&P 1.4: Passenger traffic volume:* This indicator is measured by the domestic passenger traffic volume per year via one province, including railway, highway and waterway. It's also an indicator reflects the risk level of imported infectious diseases. The data were obtained from China Statistical Yearbook.
  - *RE&P 1.5: Number of port entry personnel:* This indicator is measured including entry passengers via land ports, waterway ports and air ports in one province. It also reflects the risk level of imported infectious diseases. The data was obtained from China Port Statistical Yearbook.
  - *RE&P 2.1: Completeness of normative documents for public health emergencies:* This indicator is measured by text analysis to provincial emergency planning, disease control regulations and local standards for public health emergencies. The results are graded into 0-12 points. The criteria of text analysis include general prevention and control standards, mechanisms of emergency response, crucial point regulations, medical product standards, epidemiological investigation and medical treatment measures, medical facilities construction standards, and medical informatization standards. The text of normative documents was obtained from website of general office of provincial government.
  - *RE&P 2.2: Construction space for emergency facilities per capita:* The redundancy of construction space for emergency facilities is important when severe epidemic outbreaks. The data of area of urban construction land for municipal utilities was obtained from China Urban and Rural Construction Statistical Yearbook.
  - *RE&P 2.3: Percentage of medical and health expenditure out of total government public expenditure:* Fiscal investment is a fundamental work in health emergency preparedness. The data were obtained from China Statistical Yearbook.
  - *D&R 1.1: Number of CDCs per 1,000 population:* The CDC systems at all levels are the major access of health emergency early warning and response. The data were obtained from China Health Statistics Yearbook.
  - *D&R 1.2: Availability rate of 4G mobile phone:* This indicator is measured by the percentage of population who own a 4G mobile phone. It is a key indicator that reflects the accessibility of warming information. The data were obtained from China Information Almanac.
  - *D&R 2.1: Incidence of category A and B infectious diseases:* This indicator is one of the most common used indicators in health emergency response assessment. The infectious diseases are divided into Category A, B and C based on the Law of the People's Republic of China on the Prevention and Treatment of Infectious Diseases<sup>50</sup>. Category A and B infectious diseases are the diseases prevalent and cause casualties easily. The data were obtained from China Health Statistics Yearbook.
  - *D&R 2.2: Death rate of category A and B infectious diseases:* This indicator is another one of the most common used indicators in health emergency response assessment.
  - *RS&SP 1.1: Number of hospitals per 1,000 population:* Hospitals are the major place for health emergency medical treatment. The data were obtained from China Health Statistics Yearbook.

- 1290 • *RS&SP 1.2: Number of primary health care institutions per 1,000 population:* Primary health
- 1291 care institutions are the major place for early medical treatment and disease prevention. The
- 1292 data were obtained from China Health Statistics Yearbook.
- 1293 • *RS&SP 1.3: Number of beds in medical and health institutions per 1,000 population:* The
- 1294 number of beds in medical and health institutions reflects the admission capacity for health
- 1295 emergency. The data were obtained from China Health Statistics Yearbook.
- 1296 • *RS&SP 1.4: Number of practicing and assistant doctors per 1,000 population:* The number of
- 1297 doctors reflects the ability of treatment for health emergency. The data were obtained from
- 1298 China Health Statistics Yearbook.
- 1299 • *RS&SP 1.5: Number of registered nurses per 1,000 population:* The number of nurses reflects
- 1300 the ability of nursing for health emergency. The data were obtained from China Health Statistics
- 1301 Yearbook.
- 1302 • *RS&SP 1.6: Production capacity of pharmaceutical manufacturing industry:* The production
- 1303 capacity of pharmaceutical manufacturing industry is important for medical material supplies
- 1304 when severe epidemic outbreaks. This indicator is measured by the annual gross domestic
- 1305 product of pharmaceutical manufacturing industry per 10,000 population. The data were
- 1306 obtained from China Industry Statistics Yearbook.
- 1307
- 1308 • *RS&SP 2.1: Percentage of registered volunteers:* Volunteer participation assists the response to
- 1309 health emergency, and it also reflects residents' resilience to health emergency. The data were
- 1310 obtained from the Website of China Volunteer Service, an online platform provided by Ministry
- 1311 of Civil Affairs of the PRC.
- 1312 • *RS&SP 2.2: Percentage of social expenditures in the medical and health sector out of local*
- 1313 *GDP:* Social investments act as important additions to public affairs in the process of health
- 1314 emergency response. The data of social expenditures were obtained from China Health Statistics
- 1315 Yearbook.
- 1316

**COVID-19 Extensional Module:**

- 1317
- 1318 • *D&R COVID 1.1: Information release level on public health emergencies:* This indicator
- 1319 reflects the completeness, timeliness, accessibility, readability, and data curation of the officially
- 1320 released information at the early stage of COVID-19 pandemic. The original data were obtained
- 1321 from the research report on data release of Chinese provincial government on COVID-19 from
- 1322 Fudan University<sup>50</sup>.
- 1323 • *D&R COVID 2.1: System robustness of personal health code:* The indicator is measured by the
- 1324 frequency of failures (in natural logarithm) of personal health code system, divided by the
- 1325 availability rate of 4G mobile phone of each province. The original data were obtained from
- 1326 public text collected on social media platform(Weibo).
- 1327 • *D&R COVID 2.2: Average period of dynamic clearing of COVID-19 cases:* The indicator is
- 1328 measured by the average timespan of an emergence of COVID-19 cases. The open data on
- 1329 COVID-19 cases were used.
- 1330 • *RS&SP COVID 1.1: Number of nucleic acid detection sites per 1,000 population:* The data were
- 1331 obtained from the network site of National Government Service Platform.
- 1332

1333 To integrate the above indicators into an index, we determine weights for all the indicators. It is assumed  
 1334 that the six second-level indicators(without extensional modules) take equal weights to be one-sixth, and  
 1335 the relative weights of the third-level indicators, including the extensional ones, are determined by  
 1336 Entropy Weigh Method(EWM) under each one of the second-level indicators.

1337 **The calculation steps of EWM:**

1338 a) Min-Max Normalization.

$$1339 \varphi_{ij} = \begin{cases} \frac{\varphi_{ij} - \min\{\varphi_{1j}, \varphi_{2j}, \dots, \varphi_{nj}\}}{\max\{\varphi_{1j}, \varphi_{2j}, \dots, \varphi_{nj}\} - \min\{\varphi_{1j}, \varphi_{2j}, \dots, \varphi_{nj}\}} & (\text{for positive indicators}) \\ \frac{\max\{\varphi_{1j}, \varphi_{2j}, \dots, \varphi_{nj}\} - \varphi_{ij}}{\max\{\varphi_{1j}, \varphi_{2j}, \dots, \varphi_{nj}\} - \min\{\varphi_{1j}, \varphi_{2j}, \dots, \varphi_{nj}\}} & (\text{for negative indicators}) \end{cases}$$

1340  $\varphi_{ij}$  is the original data of the  $j$ th third-level indicator of the  $i$ th province,  $n$  is the amount of provinces.

1341 A positive indicator is an indicator that larger value means better result, while a negative indicator is an  
 1342 indicator that larger value means worse result.

1343

1344 b) Calculate the proportion of normalised sample value.

$$1345 p_{ij} = \frac{\varphi_{ij}}{\sum_{i=1}^n \varphi_{ij}} \quad (j = 1, 2, \dots, m)$$

1346  $m$  is the amount of the third-level indicators under the same second-level indicator.

1347

1348 c) Calculate the entropy of indicators.

$$1349 e_j = -\frac{1}{\ln n} \sum_{i=1}^n p_{ij} \ln(p_{ij}) \quad (j = 1, 2, \dots, m)$$

1350  $e_j$  is the entropy of the  $j$ th third-level indicator.

1351

1352 d) Calculate the entropy redundancy of indicators.

$$1353 d_j = 1 - e_j$$

1354  $d_j$  is the entropy redundancy of the  $j$ th third-level indicator.

1355

1356 e) Determine the relative weights of indicators.

$$1357 w_j = \frac{d_j}{\sum_{j=1}^m d_j} \quad (j = 1, 2, \dots, m)$$

1358 The weight value of third-level indicators are shown above in **Table 13**.

1359

1360 Considering the renewing of the index, data source and weights, it would be invalid to compare directly  
 1361 the scores regarding health emergencies management in 2020 with those in previous years. A linear  
 1362 revising process was applied to modify the results into the same criteria in accordance with the 2018  
 1363 index system. And if there are further updates of the index system in the future(which will be quite slight  
 1364 to ensure the stability of index system), such revision process will ensure the comparability of results  
 1365 between different years, so that time-series analyses are possible.



1366 **The revising procedure is described as follows:**

1367 a) Let the original index scores in the present year be  $s_{20}$ , the revised score results in the present  
1368 year be  $s_{21}$ , and the revised index scores in the previous year be  $s_{11}$ . Make the linear transformation  
1369 function as:

$$1370 \quad s_{21} = a s_{20} + b$$

1371 b) Calculate the average score of the present year in both original and revised standards.

1372  $s_{20,avg}$  is the average of original index scores among provinces in the present year.  $s_{21,avg}$  is the  
1373 corresponding score of  $s_{20,avg}$  putting into the old criterion, which could have been obtained in the  
1374 previous year with the average level of indicators in the present year. For the third-level indicators that  
1375 were not included in this year's index system, use data from last year as an alternative.

1376 c) Compare and fit the score results  $s_{11}$  and  $s_{20}$ .

1377 It is assumed that the ranking distributions of provincial indexes are similar in two successive years,  
1378 so that  $s_{11}$  and  $s_{20}$  have linear relationship as

$$1379 \quad s_{11} = a' s_{20} + b'$$

$$1380 \quad a \approx a'$$

1381 Fit the results of two years and get the estimated value of  $a$  as 0.7839.

1382 d) Calculate the constant  $b$ .

$$1383 \quad b = s_{21,avg} - a s_{20,avg}$$

1384 e) Finally calculate the revised results  $s_{21}$ .

1385

## 1386 **Data**

1387 Unless otherwise specified, the most recent version of data available is used in this study.

- 1388 1. The list of *2021 National Health Cities* is obtained from the website of National Health Commission  
1389 of the PRC (<http://www.nhc.gov.cn/>).
- 1390 2. For data of total cities, population, GDPs, passenger traffic volume, and percentage of medical and  
1391 health expenditure in government public expenditure, the most recent available version is China  
1392 Statistical Yearbook 2021<sup>51</sup>, which contains the data of every province in 2020.
- 1393 3. The data on urban population density and area of urban construction land for municipal utilities are  
1394 based on China Urban and Rural Construction Statistical Yearbook. The most recent available  
1395 version is China Urban and Rural Construction Statistical Yearbook 2020<sup>52</sup>, which contains the data  
1396 of every province in 2020.
- 1397 4. The data on the percentage of migrant population are based on the website of Migrant Population  
1398 Data Platform (<http://www.chinaldrk.org.cn/wjw/#/home>). The most recent available data are based  
1399 on the Seventh National Census of China in 2020.
- 1400 5. The data on the number of port entry personnel are from China's Ports of Entry 2020 Yearbook<sup>52</sup>,  
1401 which contains the data of every province in 2019.
- 1402 6. The text of provincial normative documents for public health emergencies is taken from the websites  
1403 of the general office of every provincial government.
- 1404 7. The data on the percentage of population available to a 4G mobile phone are based on China  
1405 Information Almanac 2021<sup>53</sup>, which contains the data of every province in 2019.

- 1406 8. The data on the incidence and death rate of category A and B infectious diseases, the number of  
1407 CDCs, social expenditures, and the other indicators about medical supporting resources are based  
1408 on China Health Statistics Yearbook 2021<sup>54</sup>. The most recent available version contains the data of  
1409 every province in 2020, except for social expenditures in 2019.
- 1410 9. The data on annual gross domestic product of pharmaceutical manufacturing industry are based on  
1411 2021 China Industry Statistical Yearbook<sup>55</sup>, which contains the data of every province in 2020.
- 1412 10. The data of percentage of registered volunteers are based on the Website of China Volunteer Service  
1413 (<https://npo.chinavolunteer.cn>). The data we use in this study were obtained on 2022-03-09.
- 1414 11. The data on information release level are based on *Research Report on Data Release of Chinese*  
1415 *Provincial Government on COVID-19*<sup>50</sup>, which contains the data of every province in the first half  
1416 of 2020.
- 1417 12. The data on personal health code failures in 2020 are based on text collected from  
1418 Weibo(<https://weibo.com>).
- 1419 13. The data on COVID-19 cases are collected from the website of DX Doctor COVID-19 Global  
1420 Pandemic Real-time Report (<https://ncov.dxy.cn/ncovh5/view/pneumonia>).
- 1421 14. The data on nucleic acid detection sites were obtained from the network site of National Government  
1422 Service Platform (<https://gjzfwf.www.gov.cn>). The data we use in this study were obtained on 2022-  
1423 03-16.

#### 1425 **Caveats**

1426 Firstly, in this study, the data of most third-level indicators are based on 2020. But limited by the  
1427 availability of data, the data of some third-level indicators are based on 2019. The sharp decline of port  
1428 entry in 2020 has not been shown in the index score.

1429 Secondly, the provincial performance of COVID-19 response is dominated by many complex and  
1430 dynamic factors. An occasional oversight could result in a significant fluctuation on medical cases. Thus,  
1431 a higher score can not be equated with lower incidence or death rate. The index reflects the capability of  
1432 public health system in year scale facing emergencies, and the increasing score implies the performance  
1433 in adapting and learning from the pandemic.

#### 1434 **Future Form of Indicator**

1435 An extensional module of dynamic indicators has been made around COVID-19 this year. This attempt  
1436 provides an extensible pattern for a more consummate index system, in which more dynamic modules  
1437 could be created and join to the fundamental indicators. Each module expounds a special aspect of  
1438 concern.

1439 In addition, the time-series analysis has been developed. All the data adopted this year are collected by  
1440 official government and could be updated in the next years.

#### 1441 **Additional Information**

1442 This assessment covers all the other 31 provinces of China except Hong Kong, Macau, Taiwan. The  
1443 index results and rank of provincial comprehensive health emergencies management ability are listed  
1444 below. The basic index results present regional differences and take the order of North China, East China,

1445 Northeast China, Southwest China, Northwest China, South Central China, from higher to lower. Among  
 1446 all the provinces, Tibet, Zhejiang, Henan, Shanxi and Jiangsu made the largest rise in rankings.  
 1447 To clarify the major driving force of score improvement, we quantified the increment (or decrement) of  
 1448 average index score caused by third-level indicators (*Figure 28*). The aspects with largest contributions  
 1449 include public health standards, medical informatization, medical hygiene expenditures, selection of  
 1450 National Health Cities, environmental risk of disease control, and public facilities and resources.  
 1451 However, the COVID-19 pandemic also caused an evident strike in the incidence and death rate of  
 1452 infectious diseases. Apart from the improvement in absolute value of indicators, weight change and  
 1453 distribution of indicator values, like the narrowing gap between provinces in some low-score indicators,  
 1454 also contributed to the improvement of the overall scores.

1455

1456 **Table 14: Index results and rank of provincial comprehensive health emergencies management**  
 1457 **ability in 2019 and 2020**

| Region                 | Province       | Index result<br>(basic in<br>2020) | Rank<br>(basic in<br>2020) | Index result<br>(extensional<br>in 2020) | Rank<br>(extensional<br>in 2020) | Index result<br>(2019) | Rank<br>(2019) |
|------------------------|----------------|------------------------------------|----------------------------|------------------------------------------|----------------------------------|------------------------|----------------|
| North China            | Beijing        | 95.19                              | 1                          | 107.26                                   | 1                                | 75.23                  | 1              |
|                        | Tianjin        | 74.86                              | 8                          | 85.88                                    | 9                                | 61.06                  | 6              |
|                        | Hebei          | 72.24                              | 13                         | 78.38                                    | 21                               | 57.18                  | 12             |
|                        | Shanxi         | 71.44                              | 17                         | 84.34                                    | 11                               | 52.86                  | 23             |
|                        | Inner Mongolia | 71.25                              | 18                         | 81.08                                    | 16                               | 55.93                  | 16             |
| Northeast<br>China     | Liaoning       | 70.07                              | 20                         | 73.44                                    | 29                               | 55.25                  | 19             |
|                        | Jilin          | 77.21                              | 6                          | 90.36                                    | 5                                | 59.35                  | 9              |
|                        | Heilongjiang   | 73.37                              | 11                         | 81.28                                    | 15                               | 57.30                  | 11             |
| East China             | Shanghai       | 86.37                              | 2                          | 95.48                                    | 3                                | 66.27                  | 2              |
|                        | Jiangsu        | 81.94                              | 3                          | 86.04                                    | 7                                | 59.51                  | 8              |
|                        | Zhejiang       | 79.12                              | 5                          | 85.37                                    | 10                               | 55.61                  | 17             |
|                        | Anhui          | 70.52                              | 19                         | 78.20                                    | 22                               | 56.35                  | 15             |
|                        | Fujian         | 67.74                              | 28                         | 76.12                                    | 25                               | 49.93                  | 26             |
|                        | Jiangxi        | 68.81                              | 24                         | 78.47                                    | 20                               | 53.97                  | 21             |
|                        | Shandong       | 79.47                              | 4                          | 83.19                                    | 12                               | 61.79                  | 5              |
|                        | Taiwan         | —                                  | —                          | —                                        | —                                | —                      | —              |
| South Central<br>China | Henan          | 72.18                              | 14                         | 79.40                                    | 19                               | 53.72                  | 22             |
|                        | Hubei          | 68.18                              | 25                         | 75.54                                    | 27                               | 55.60                  | 18             |
|                        | Hunan          | 65.87                              | 29                         | 71.04                                    | 31                               | 48.07                  | 28             |
|                        | Guangdong      | 65.35                              | 30                         | 73.28                                    | 30                               | 49.84                  | 27             |
|                        | Guangxi        | 64.53                              | 31                         | 75.15                                    | 28                               | 52.68                  | 24             |
|                        | Hainan         | 69.83                              | 21                         | 80.45                                    | 18                               | 62.78                  | 4              |
|                        | Hong Kong      | —                                  | —                          | —                                        | —                                | —                      | —              |
|                        | Macau          | —                                  | —                          | —                                        | —                                | —                      | —              |
| Southwest              | Chongqing      | 73                                 | 12                         | 87.19                                    | 6                                | 56.59                  | 14             |

|                    |          |       |    |       |    |       |    |
|--------------------|----------|-------|----|-------|----|-------|----|
| China              | Sichuan  | 71.84 | 15 | 76.07 | 26 | 59.63 | 7  |
|                    | Guizhou  | 69.76 | 22 | 82.60 | 13 | 54.47 | 20 |
|                    | Yunnan   | 69.69 | 23 | 76.89 | 24 | 51.47 | 25 |
|                    | Tibet    | 74.59 | 10 | 95.61 | 2  | 47.49 | 30 |
| Northwest<br>China | Shaanxi  | 71.53 | 16 | 80.78 | 17 | 56.83 | 13 |
|                    | Gansu    | 74.62 | 9  | 92.14 | 4  | 58.88 | 10 |
|                    | Qinghai  | 68.16 | 26 | 81.91 | 14 | 47.90 | 29 |
|                    | Ningxia  | 76.17 | 7  | 85.94 | 8  | 65.06 | 3  |
|                    | Xinjiang | 67.89 | 27 | 78.02 | 23 | 42.54 | 31 |

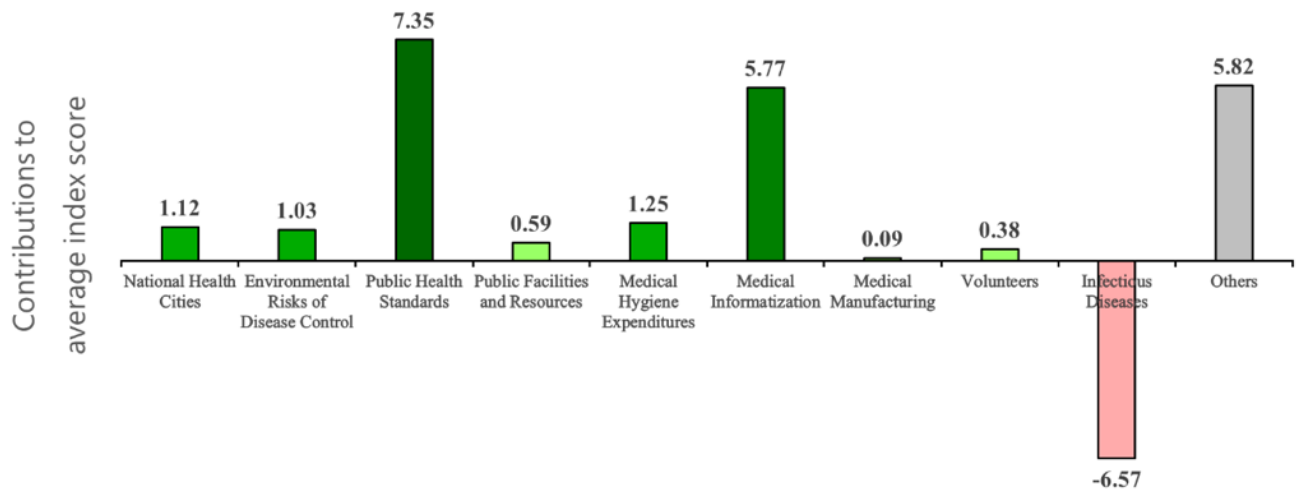

1458

1459

**Figure 28: The increment (or decrement) of average index score for health emergencies management caused by third-level indicators**

1460

1461

## 1462 Indicator 2.2.2: Air conditioning - benefits and harms

### 1463 Methods

1464 The 2020 and 2021 China report of Lancet Countdown calculated the prevented fraction of heatwave-related mortality due to the use of air conditioning. However, the prevented fraction did not provide  
1465 information on the absolute number of heat-related deaths averted by air conditioning.  
1466

1467 The 2022 report overcomes the limitation of the prevented fraction by adopting results from Indicator  
1468 1.1.1, and further presents the estimated heat-related deaths prevented by air conditioning in people aged  
1469 65 years and older.

1470 The method is kept the same as that in the global Lancet Countdown 2021 report<sup>11</sup>. Firstly, the estimated  
1471 heat-related deaths in persons aged 65 years and older was taken from Indicator 1.1.1 (Do). Secondly,  
1472 the number of heat-related deaths in the 65-and-older population in the complete absence of household  
1473 air conditioning (De) was calculated as:

1474  $De = Do / (1 - PF)$

1475 where PF is the prevented fraction. The formula for PF is consistent with that in the 2020 and 2021 China  
1476 report of Lancet Countdown, which is shown as:

$$1477 \quad PF = Pac * (1 - RRac) = Pac * (1 - 0.24) = Pac * (0.76)$$

1478 where Pac is the proportion of the population having household air conditioning, compared with a  
1479 scenario of complete absence of household air conditioning; RRac is the relative risk of death during a  
1480 heatwave or hot weather among persons who have household air conditioning compared with persons  
1481 who do not have household air conditioning.

1482 Finally, the heat-related deaths prevented by air conditioning in people aged 65 years and older (Da) was  
1483 estimated as:

$$1484 \quad Da = De - Do$$

#### 1485 **Data**

1486 The International Energy Agency (IEA) provided the proportion of the Chinese population having  
1487 household air conditioning (Pac), and carbon dioxide emissions by air conditioning in China.

1488 The research group of Indicator 1.1.1 kindly provided the estimated heat-related deaths in persons aged  
1489 65 years and older in China (Do).

#### 1490 **Caveats**

- 1491 1. The PF calculation was based on the RRac, whose value may vary among different countries.  
1492 However, the specific estimate of RRac in China is absent. In this study, we assumed RRac to be  
1493 0.24 from a meta-analysis in five countries (the United States, France, Italy, Greece and Australia).  
1494
- 1495 2. This indicator focused on the target population  $\geq 65$  years. In the De calculation, the PF should be  
1496 the prevented fraction in the 65-and-older population. However, the Pac and RRac used for the PF  
1497 calculation were from the general population. It is possible that Pac and RRac differ between persons  
1498  $\geq 65$  years of age and younger persons.  
1499

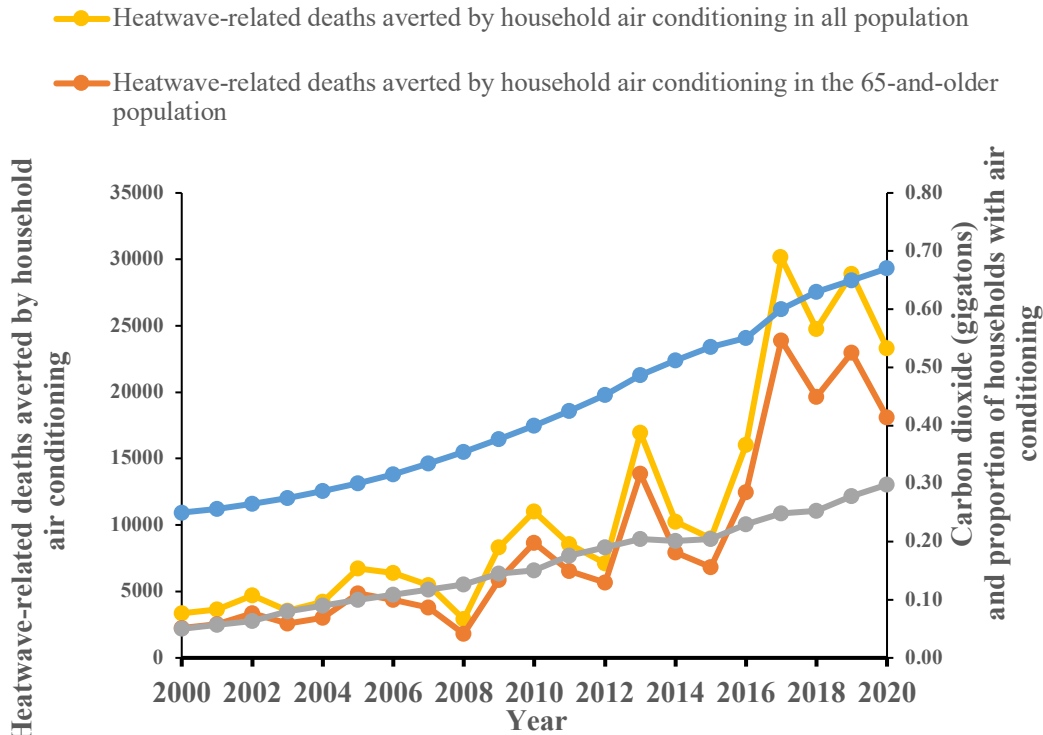

1500

1501 **Figure 29: Heatwave-related deaths averted by air conditioning and carbon dioxide emissions**  
 1502 **from air conditioning in China**

1503 **Indicator 2.2.3: Urban green space**

1504 **Methods**

1505 The urban green space indicator considers green space changes measured through remote sensing  
 1506 satellite images, taking into account urban boundaries and population density. Normalized Difference  
 1507 Vegetation Index (NDVI), the most commonly used metrics to monitor vegetation, is calculated as the  
 1508 ratio between the difference in the surface reflectance intensities of the red (around 0.66 μm) and infrared  
 1509 radiation (around 0.86 μm) divided by the sum of their intensities. NDVI is associated with the fraction  
 1510 of solar radiation absorbed by plants during photosynthesis. NDVI value is between -1 and 1, a large  
 1511 positive NDVI value is typically associated with a high density of green vegetation and thus indicates a  
 1512 higher greenness level. We used NDVI images from the Moderate Resolution Imaging  
 1513 Spectroradiometer (MODIS) sensor at a 250-meter resolution to estimate the urban green space level.  
 1514 MOD13Q1 data is processed in 16-day periods by compiling the best available pixel value over the 16  
 1515 days. We used cloud masks to remove cloud pixels to retain the best-quality information about vegetation.  
 1516 All MOD13Q1 images from the year 2011 to 2021 were acquired. For each year, one NDVI median layer  
 1517 was computed from the MODIS NDVI time series stack to represent the average greenness condition by  
 1518 finding the median value of the time series profile on a pixel basis. Using median value instead of the  
 1519 mean is to remove the potential outliers. To estimate the effects of greenness on communities, population-  
 1520 weighted NDVI for each province was calculated as

1521 
$$\frac{\sum_{i=1}^n (NDVI_i \times Pop_i)}{\sum_{i=1}^n Pop_i} \quad (1)$$

1522 where  $n$  is the number of pixels in urban area with valid NDVI data in a province. We used population-  
 1523 weighted NDVI to measure urban greenness and its trend in the past decade. We used linear regression

1524 to calculate the annual population-weighted NDVI from 2011 to 2021 for each province. If the coefficient  
 1525 of the slope was positive or negative and its p value was less than 0.05, the green space in the province  
 1526 was defined as having a significant increase or decrease trend. If the p value was larger than 0.05, the  
 1527 green space was defined as having no significant change.

1528 For a more effective indication of provinces' greenness levels, we categorized NDVI values using the  
 1529 following table:

1530

1531 **Table 15: Categorization of greenness level by NDVI value<sup>20</sup>:**

| Greenness level    | Categorization | NDVI range |
|--------------------|----------------|------------|
| Exceptionally low  | 1              | <0.19      |
| Very low           | 2              | 0.2-0.29   |
| Low                | 3              | 0.3-0.39   |
| Moderate           | 4              | 0.4-0.49   |
| High               | 5              | 0.5-0.59   |
| Very high          | 6              | 0.6-0.69   |
| Exceptionally high | 7              | 0.7-0.79   |

1532

1533 Mortality attributable to NDVI change  $M$  is expressed as

1534 
$$M = y_0 \times Pop \times AF \quad (2)$$

1535 where  $y_0$  is the province-level annual non-injury mortality rate,  $Pop$  is the population size and  $AF$   
 1536 is the attributable fraction of NDVI difference between 2011 and 2021.

1537  $AF$  is calculated via the relative risk ( $RR$ ), which represents the decrease of risk of mortality resulting  
 1538 from the NDVI difference.  $AF$  is calculated as

1539 
$$AF = \frac{RR-1}{RR} \quad (3)$$

1540 According to a limited literature review<sup>56</sup>, a 0,1-unit increase of NDVI could reduce mortality risk by  
 1541 4%, i.e.  $RR_{0.1-unit-increase} = 0.96$  [95% CI 0.94 – 0.97]. Therefore,  $RR$  of NDVI difference  
 1542 between 2011 and 2021 is calculated as

1543 
$$RR_{diff} = RR_{0.1-unit-increase}^{diff/0.1} \quad (4)$$

1544 Where  $diff$  is NDVI in 2021 subtracted by NDVI in 2011. This method was applied to the NDVI and  
 1545 population layers, and mortality attributable to NDVI change was summed up by province.

1546 **Data**

1547 1. MODIS NDVI products were obtained from MOD13Q1 V6 Terra VI 16-day global 250m.<sup>57</sup>

1548 2. City boundaries were collected from the Global Rural-Urban Mapping Project (GRUMP) urban  
 1549 extent polygons.<sup>58,59</sup>

1550 3. Population data in 2011-2020 was acquired from Population data from the NASA Socioeconomic  
 1551 Data and Applications Center (SEDAC) Gridded Population of the World (GPWv4) and The Inter-  
 1552 Sectoral Impact Model Intercomparison Project (ISIMIP) Histsoc dataset. Population in Taiwan and  
 1553 Macao were unavailable. Since the latest data is by 2020, results in 2021 was calculated using  
 1554 population data in 2020.<sup>60-62</sup>

1555 4. Province-level mortality rate was obtained from national or provincial annual statistics. In Tianjin,  
1556 Liaoning, Sichuan, Anhui, Hainan, Ningxia, and Xizang, the latest data available was in 2019; in Jilin  
1557 and Hongkong, the latest mortality rate data was in 2020; for other areas, the mortality rate in 2011 was  
1558 used.

1559

1560 **Caveats**

1561 NDVI is a continuous indicator varying from -1 to 1, and provides information for each pixel on the  
1562 landscape, including non-vegetated lands (e.g., impervious surfaces, water, and snow). We did not  
1563 exclude the non-vegetated areas for calculating province-level NDVI considering several reasons given  
1564 by previous research.<sup>19</sup> It was suggested that taking the median value of annual NDVI data and its  
1565 trend over decade can reflect the changes in vegetation. The quantity of green space, as measured by  
1566 NDVI, does not reflect the quality of green space.

1567 **The future form of the indicator**

- 1568 1. Future forms of green space will include indicators on quality of green space, by utilizing  
1569 existing databases on street view, and other remote sensing techniques.
- 1570 2. Considering city expansion, rapid urbanization and peri-urbanization, there may be opposite  
1571 trends of green space on the outskirts versus inner city. We need to take green space inequality  
1572 into account.
- 1573 3. We aim to use higher resolution of population data and green space data in future indicators,  
1574 so that we can generate more precise estimates of green space changes.

1575 **Additional information**



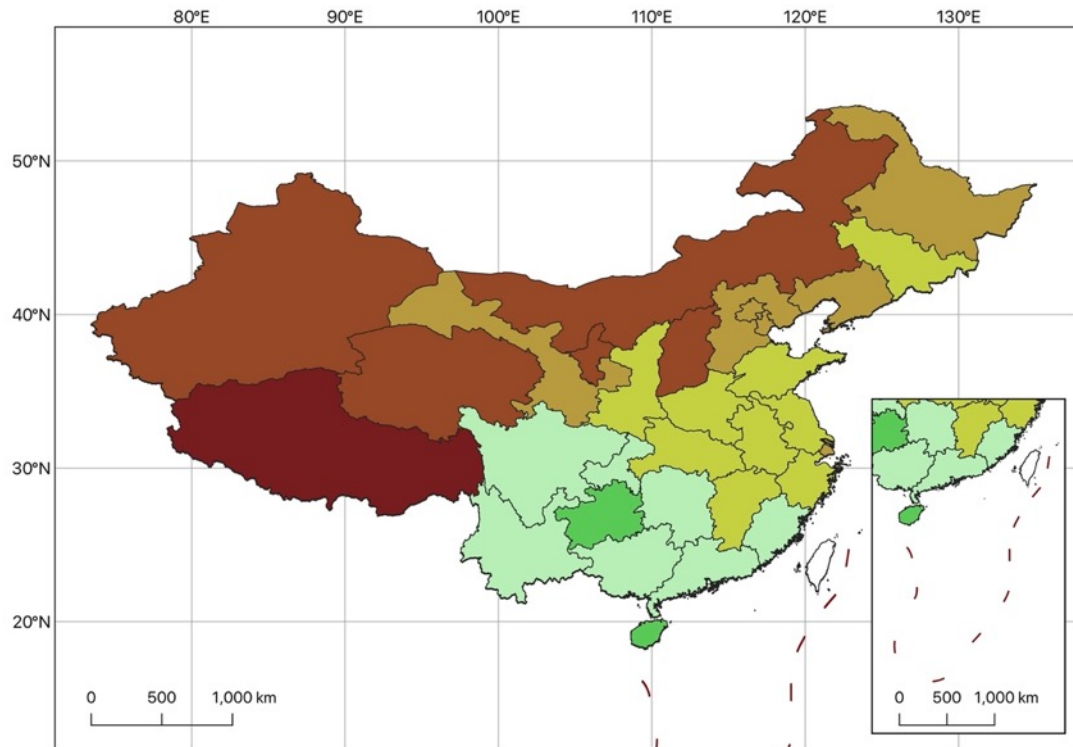

**Level of urban green space measured by population-weighted NDVI value in 2021**

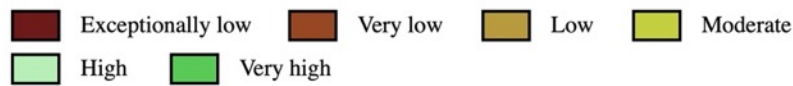

1576

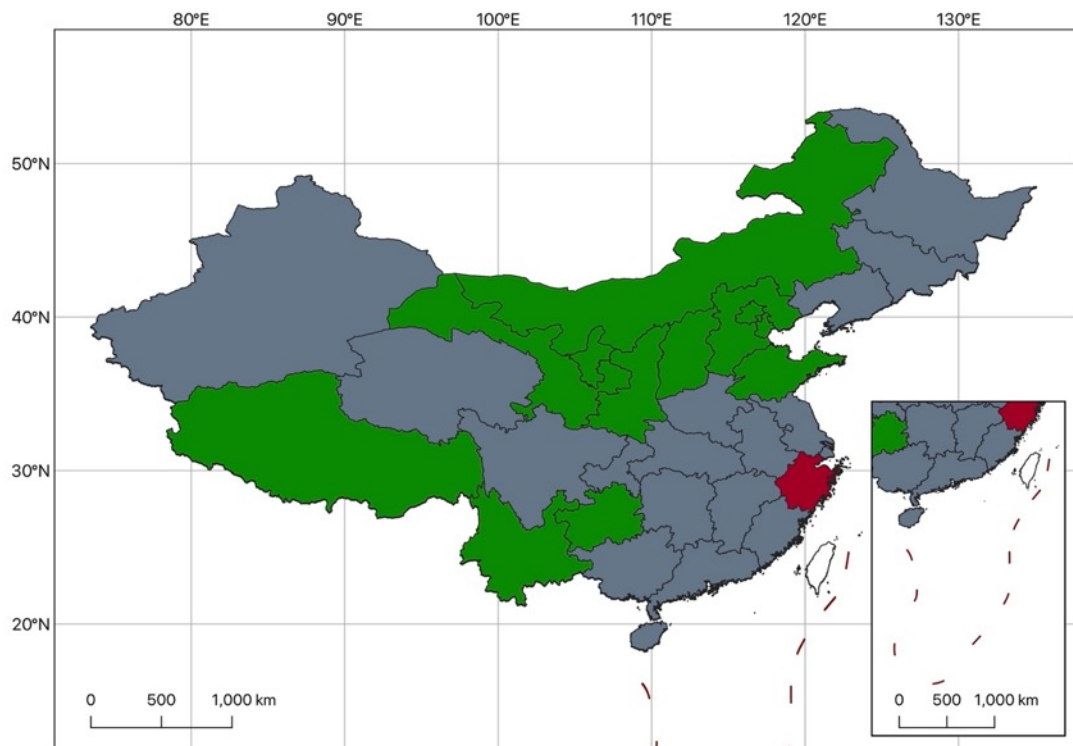

**Trends of urban green space measured by population-weighted NDVI value in 2011-2021**

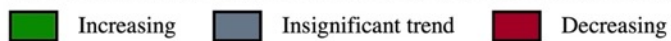

1577

1578 **Figure 30:** Level of urban green space measured by population-weighted NDVI in 2021 (up) and  
 1579 change between 2011 and 2021 (down)

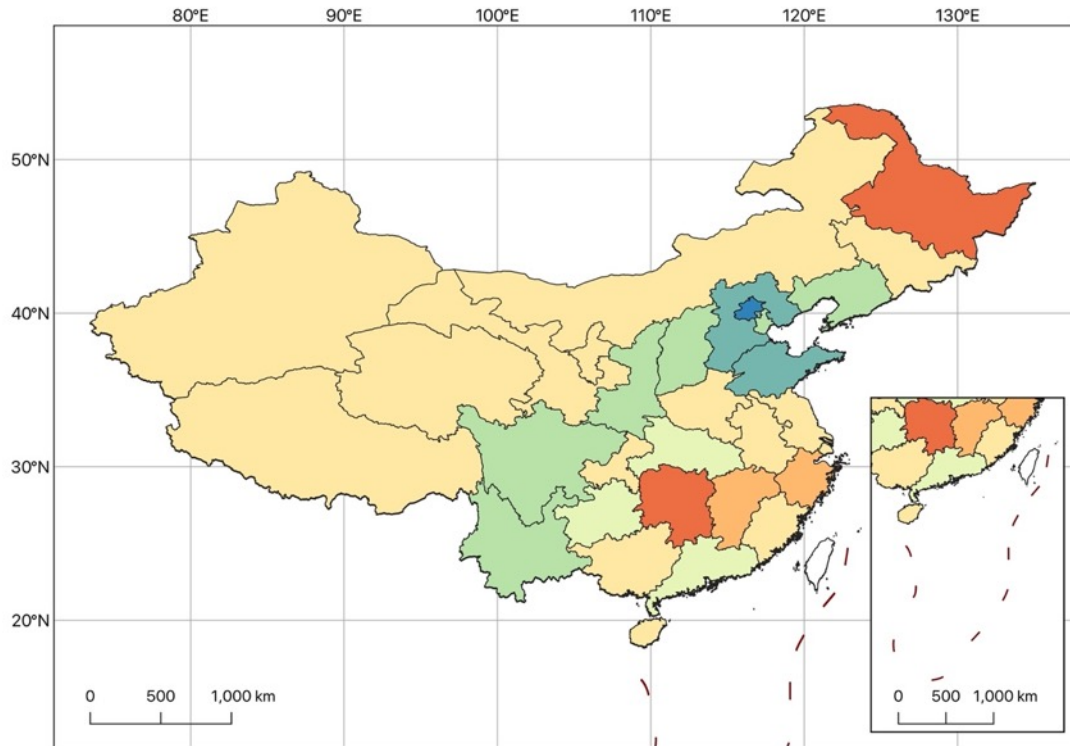

**Mortality averted or attributable by urban green space in 2021, comparing with that in 2011**

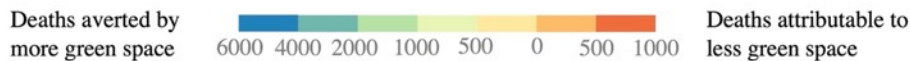

1580

1581 **Figure 31:** Mortality change related to urban green space between 2011 and 2021.

1582 **Indicator 2.3: Climate information services for health**

1583 **Methods**

1584 This indicator includes two sub-indicators. The first tracks in which provinces provincial  
 1585 meteorological departments provide climate and weather information or products to the public  
 1586 health sector, and the second tracks in which provinces meteorological departments and public  
 1587 health departments have signed collaboration agreements.

1588

1589 The annual survey targeting provincial meteorological departments, mentioned in indicator 2.1.2,  
 1590 covers questions for the two sub-indicators. Detailed information on the response rate can be found  
 1591 in indicator 2.1.2. The question for the first sub-indicator was included in the 2021 survey. The  
 1592 responses to the question in the 2022 survey track the progress of the sub-indicator. The question  
 1593 for the second sub-indicator was new in the 2022 survey.

1594

1595 Meanwhile, governmental news releases on collaboration between local meteorological  
 1596 departments and public health departments or organizations were searched for in the Baidu search  
 1597 engine. The author team selected a set of keywords and created search queries to cover  
 1598 meteorological bureaus and health-related departments or organizations in China, define the scope

1599 to collaboration, and limit the source to governmental websites. Health-related departments or  
 1600 organizations include health commissions, centers for disease control and prevention, medical  
 1601 colleges, hospitals, etc. Only collaborations involving meteorological information were included.  
 1602 Hence, collaborations for releasing COVID-19 warnings via the emergency early warning release  
 1603 system operated by meteorological bureaus were not included. Queries and keywords used are  
 1604 shown in Table 16. There were two rounds of searching. The first round was conducted by using the  
 1605 queries. The second round was specifically for provinces without explicit findings in the first round  
 1606 searching.

1607

1608 **Table 16** Queries and keywords used for searching for official news posted online on collaboration  
 1609 between meteorological bureaus and public health-related governmental departments

| Query | Source        | Meteorology | Health                   | Collaboration |
|-------|---------------|-------------|--------------------------|---------------|
| 1     | site:(gov.cn) | "气象"        | (卫生   健康   卫健   疾病   疾控) | (合作   协议)     |
| 2     | inurl:cdc     | "气象"        | (卫生   健康   卫健   疾病   疾控) | (合作   协议)     |

1610

1611 **Data**

1612 1. Annual Provincial Survey on Climate Change Assessment and Information Services

1613 2. Baidu

1614

1615 **Caveats**

1616 Please see the caveats of the annual survey mentioned in indicator 2.1.2.

1617

1618 Searching results on Baidu only include related information posted on official websites of  
 1619 governmental departments in China. News on non-governmental websites and information not  
 1620 posted online were not covered, which could make the results biased.

1621

1622 **Future Form of Indicator**

1623 Information on improvement in the annual survey can be found in indicator 2.1.2.

1624

1625 *Headline finding: In 2021, in most provinces, meteorological data were provided to the public health*  
 1626 *sector, and in over one third of provinces, meteorological bureaus collaborated with local health*  
 1627 *departments or organizations for climate information services for health.*

1628 Meteorological information supports decision-making for climate change health adaptation. The  
 1629 results of the annual surveys of provinces' meteorological departments show that out of 31 provinces,  
 1630 there have been 27 provinces providing meteorological data to the public health sector. More  
 1631 important than data sharing, inter-agency collaborations drive climate information services for  
 1632 health open to the public. According to the news releases, in 21 provinces, province-, city-, or  
 1633 county-level meteorological bureaus have collaborated or signed collaboration agreements with  
 1634 local health-related departments or organizations for providing climate information services for  
 1635 health.

1636

1637 **Additional information**

1638 Based on the survey results, the 27 provinces whose meteorological departments provided  
 1639 meteorological data to the public health sector included Anhui, Beijing, Chongqing, Fujian, Gansu,

1640 Guangdong, Guangxi, Guizhou, Hainan, Hebei, Heilongjiang, Henan, Hebei, Hunan, Inner  
1641 Mongolia, Jiangxi, Liaoning, Ningxia, Qinghai, Shandong, Shanghai, Shanxi, Tianjin, Tibet,  
1642 Xinjiang, Yunnan, and Zhejiang.

1643

1644 The 21 provinces with meteorology-health collaborations included Anhui, Beijing, Guangdong,  
1645 Guangxi, Hainan, Hebei, Heilongjiang, Henan, Hubei, Hunan, Jiangsu, Jiangxi, Liaoning, Inner  
1646 Mongolia, Shaanxi, Shanghai, Sichuan, Tianjin, Xinjiang, Yunnan, and Zhejiang.

1647

## 1648 **Section 3: Mitigation actions and health co-** 1649 **benefits**

### 1650 **Indicator 3.1: Energy system and health**

#### 1651 **Indicator 3.1.1: Carbon intensity of the energy system**

1652 Carbon intensity of China and six regions in China, supplemented with additional statistics for China  
1653 CO<sub>2</sub> emissions from energy combustion.

#### 1654 **Methods**

1655 This indicator contains two components:

- 1656 1. Carbon intensity (CI) of the energy system, at national (2000-2021) scales, in kgCO<sub>2</sub>/US\$.
- 1657 2. China national CO<sub>2</sub> emissions from energy combustion by fuel and industrial process (mainly  
1658 cement), in MtCO<sub>2</sub> (2000-2021).

1659 The technical definition of CI is the kilogram (kg) of CO<sub>2</sub> emitted for each unit (US\$) of Gross  
1660 Domestic Product (GDP). The rationale for the indicator choice is that carbon intensity of the  
1661 economic system will provide information on the level of fossil fuel use, which has associated air  
1662 pollution impacts. Higher intensity values indicate a more fossil dominated economic system, and  
1663 one that is likely to have a higher coal share. As countries pursue climate mitigation goals, the carbon  
1664 intensity is likely to reduce with benefits for air pollution. The indicator is calculated based on total  
1665 CO<sub>2</sub> emissions from fossil fuel divided by GDP. GDP reflects the economic development status in  
1666 an area/country.

1667 The national CO<sub>2</sub> from 2000-2019 is from the World Bank<sup>9,63-67</sup>. The national CO<sub>2</sub> emissions from  
1668 2020 to 2021 is from the Carbon Monitor (<https://carbonmonitor.org/>). The calculation of CI is  
1669 represented as below:

1670

$$CI_t = CO2_t / GDP_t$$

1671 Where  $t$  represents year;  $CO2_t$  denotes CO<sub>2</sub> emission in  $t$ ;  $GDP_t$  represents the GDP in  $t$  which is

1672 adjusted by the constant price in 2020 and the present GDP value and GDP index in  $t$ , which are  
1673 collected from China Statistical Yearbook<sup>67</sup>.

1674 The sectoral approach is applied to calculate carbon emissions in this study and compared to the  
1675 reference approach, carbon emissions calculated by the sectoral approach are 1% to 7% lower and  
1676 these results are more accurate<sup>64</sup>. The sectoral approach can be generally formulated as:

$$1677 \quad CE_i = AD_i \times EF_i$$

1678 Where  $CE_i$  refers to CO<sub>2</sub> emissions from type  $i$  included in types of fossil fuels and cement,  $AD_i$   
1679 refers to the activity data of the type  $i$ , and  $EF_i$  refers to the emission factor of the type  $i$ .

#### 1680 **Data**

- 1681 1. Energy balance tables are taken from China Energy Statistical Yearbook 2001-2020<sup>67</sup>;
- 1682 2. The national CO<sub>2</sub> from 2000-2019 is from the World Bank;
- 1683 3. The daily CO<sub>2</sub> emissions of China in 2020 and 2021 is taken from the Carbon Monitor  
1684 (<https://carbonmonitor.org/>).

#### 1685 **Caveats**

1686 Due to a lack of latest data from Chinese Energy statistical data for 2020 and 2021, in our paper,  
1687 national carbon emissions of 2020 and 2021 is from the Carbon Monitor  
1688 (<https://carbonmonitor.org/>), which is based on assumption of changes of social and economic  
1689 activities, which can create bias from the real emissions.

#### 1690 **Future Form of Indicator**

1691 This indicator for the national level and provinces will need to be updated to provide the data for the  
1692 most recent years.

#### 1693 **Additional Information**

1694

#### 1695 **Indicator 3.1.2: Energy system and health - Coal phase-out**

#### 1696 **Methods**

1697 Two indicators are used here: (1) Total primary energy supply from coal in China and by province (in  
1698 EJ units); and (2) share of coal in total primary energy supply.

1699 The indicator on primary energy coal supply is an aggregation of all coal types used across all sectors  
1700 from annual editions of Energy Statistical Yearbook of China. The data is available for the period 2000-  
1701 2021 at the national level, and for the period 2000-2019 for each province.<sup>68</sup>

1702 **Data**

1703 The data for this indicator is taken from annual edition of Energy Statistical Yearbook of China. <sup>68</sup>

1704 **Caveats**

1705 These indicators provide a proxy for air quality emissions associated with the combustion of coal. Further  
 1706 work is required to convert coal use by sector and type into emissions of different air quality pollutants.

1707 **Future Form of Indicator**

1708 In the future, this indicator set could be developed to also estimate the actual air pollutant emissions  
 1709 associated with coal use. This will require sectoral use, coal type (both of which are available) and  
 1710 appropriate emission factors.

1711 **Additional Information**

1712 **Table 17: Coal consumption by province, 2010-2019**

1713

Unit: PJ

| Province       | 2015   | 2016   | 2017   | 2018    | 2019    |
|----------------|--------|--------|--------|---------|---------|
| Beijing        | 243.9  | 177.4  | 102.7  | 57.8    | 38.3    |
| Tianjin        | 950.1  | 885.5  | 811.3  | 802.3   | 788.4   |
| Hebei          | 6058.7 | 5883.4 | 5739.3 | 6194.9  | 6015.9  |
| Shanxi         | 7769.4 | 7456.6 | 8989.2 | 10244.8 | 10745.4 |
| Inner Mongolia | 7640.6 | 7677.3 | 8079.3 | 9239.6  | 10264.8 |
| Liaoning       | 3629.1 | 3546.9 | 3681.6 | 3748.0  | 3916.8  |
| Jilin          | 2052.6 | 1971.3 | 1958.2 | 1790.5  | 1827.6  |
| Heilongjiang   | 2811.9 | 2937.9 | 3028.8 | 2799.0  | 2960.5  |
| Shanghai       | 989.8  | 968.3  | 958.3  | 925.4   | 887.2   |
| Jiangsu        | 5695.8 | 5871.4 | 5572.4 | 5318.6  | 5212.8  |
| Zhejiang       | 2894.2 | 2919.9 | 2985.5 | 2968.4  | 2863.0  |
| Anhui          | 3280.5 | 3292.5 | 3367   | 3490.2  | 3495.8  |
| Fujian         | 1603.5 | 1429   | 1579   | 1791.6  | 1825.0  |
| Jiangxi        | 1611.5 | 1594.6 | 1624.7 | 1649.1  | 1673.8  |
| Shandong       | 8567.3 | 8569.9 | 7989.1 | 8858.9  | 9029.1  |
| Henan          | 4965.4 | 4862.1 | 4745.4 | 4675.0  | 4196.2  |
| Hubei          | 2463   | 2446.2 | 2465.3 | 2323.6  | 2463.5  |
| Hunan          | 2332.4 | 2395.5 | 2596.7 | 2286.4  | 2232.3  |
| Guangdong      | 3472.3 | 3377.6 | 3594.7 | 3572.8  | 3523.9  |
| Guangxi        | 1265.8 | 1364.4 | 1384.4 | 1536.5  | 1679.2  |
| Hainan         | 224.4  | 212.5  | 230.1  | 243.4   | 236.6   |
| Chongqing      | 1265.9 | 1187.8 | 1182   | 1073.8  | 1051.5  |
| Sichuan        | 1944.5 | 1856.7 | 1644.5 | 1569.1  | 1614.7  |

|          |        |        |        |        |        |
|----------|--------|--------|--------|--------|--------|
| Guizhou  | 2686.5 | 2855.9 | 2807.1 | 2513.7 | 2554.7 |
| Yunnan   | 1614.6 | 1561.9 | 1509.6 | 1549.6 | 1576.8 |
| Shaanxi  | 3846.2 | 4117.7 | 4201.2 | 4060.2 | 4510.9 |
| Gansu    | 1372.6 | 1335   | 1331.5 | 1427.4 | 1425.6 |
| Qinghai  | 315.7  | 410.8  | 365.7  | 343.2  | 322.8  |
| Ningxia  | 1864.6 | 1813.9 | 2314.8 | 2660.9 | 2872.9 |
| Xinjiang | 3633.9 | 3974.2 | 4264.1 | 4561.4 | 4961.6 |

1714 **Note: (1) data for Tibet is not available. (2) Due to statistical difference, provincial sum does not**  
1715 **equal to national total.**

1716 **Although overall coal share in China’s energy mix continued to decline, national coal use**  
1717 **increased by 4.6% from 2020 to 2021<sup>69</sup>, a highest annual growth rate since 2011, setting a**  
1718 **historical record. From a regional perspective, Jing-Jin-Ji area and Eastern coastal provinces cut**  
1719 **their coal use substantially in recent years partially due to strict air quality regulations, while a**  
1720 **continuous increase was observed in Shanxi and Inner Mongolia, two provinces with abundant**  
1721 **coal resources, and Northwestern provinces, i.e. Shaanxi, Ningxia and Xinjiang.**

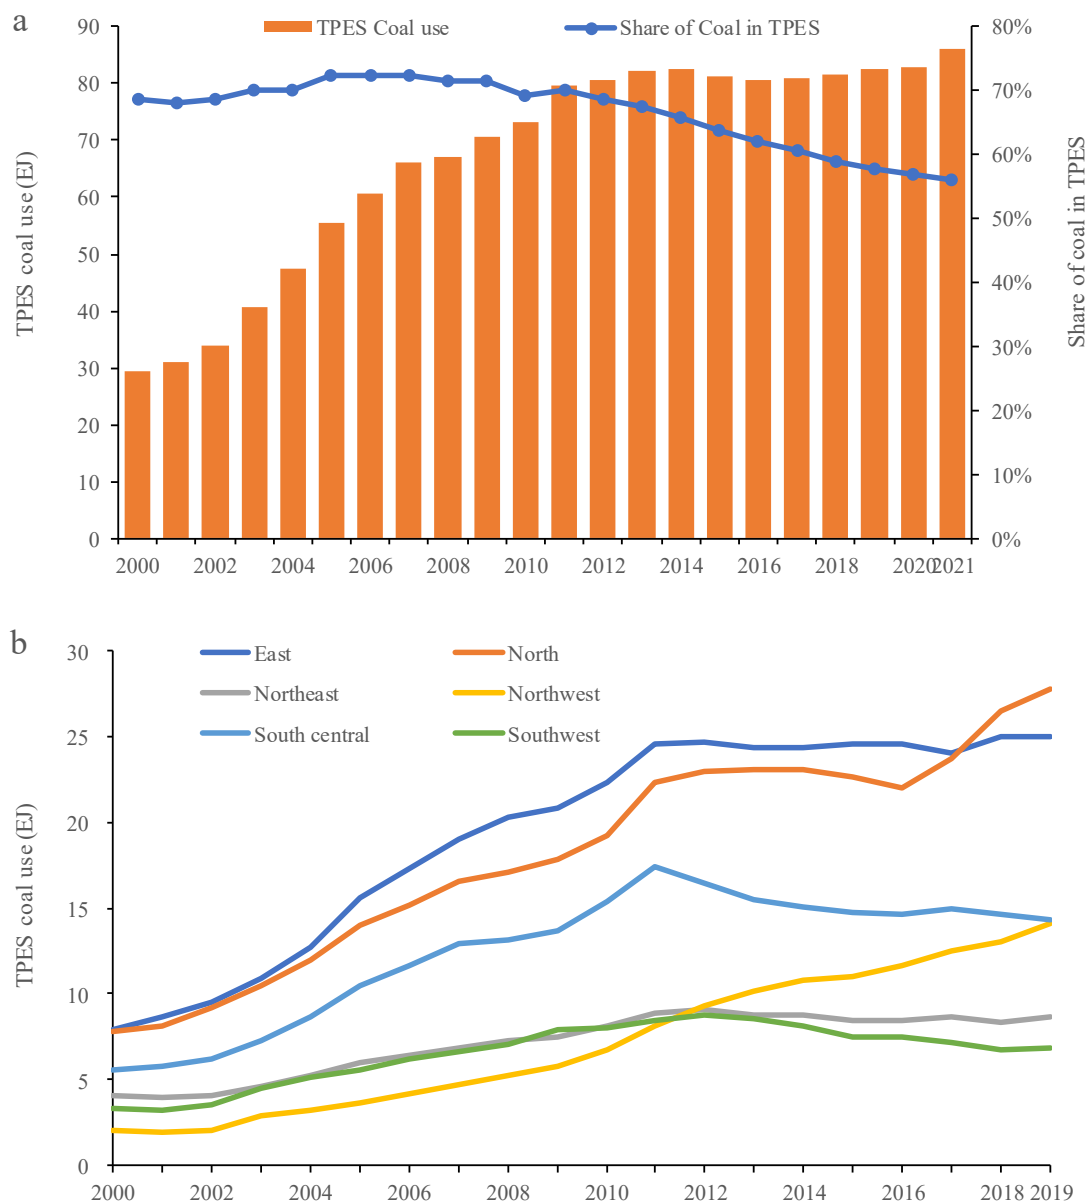

1722

1723 **Figure 32: National and regional Total Primary Energy Supply (TPES) from coal. (A) TPES**  
 1724 **from coal and the proportion in TPES in China (2000-2021); (B) TPES from coal in six regions**  
 1725 **(2000-2019).**

1726

1727 **Indicator 3.1.3: Low-carbon emission electricity**

1728 1. Total low carbon electricity generation(solar, hydro, wind and nuclear), in absolute terms (TWh) and  
 1729 as a percentage share of total electricity generated;

1730 2. Total renewable generation (solar, hydro and wind), in TWh, and as a percentage share of total  
 1731 electricity generated.

1732 **Methods**



1733 Two indicators are used here, and presented in two ways:

1734 1. Total low carbon electricity generation, in absolute terms (TWh) and as a percentage share of total  
1735 electricity generated (to include solar, wind and nuclear and hydropower); and

1736 2. Total renewable generation (include solar, wind and hydropower), in TWh, and as a percentage share  
1737 of total electricity generated.

1738 The increase in the use of low carbon and renewable energy for electricity generation will push other  
1739 fossil fuels, such as coal, out of the mix over time, resulting in an improvement in air quality, with  
1740 benefits to health. The indicator of renewable electricity has been used to allow for the racking of rapidly  
1741 emergent renewable technologies. For both indicators, electricity generation, rather than capacity, has  
1742 been chosen as a metric as the electricity generated from these technologies is what actually displaces  
1743 fossil-based generation.

1744 The absolute level indicators are total gross generated electricity aggregated from the relevant  
1745 technologies. The share indicators are estimated as the low carbon or renewable generation as a  
1746 percentage of total generation.

#### 1747 **Data**

1748 The annual data of electricity by technology from 2010 to 2019 was from the China Energy Statistical  
1749 Yearbook (2011-2020)<sup>70</sup>. Data of electricity by technology in 2020 and 2021 was from China electricity  
1750 Council<sup>71</sup> and China Energy Statistical Yearbook (2021)<sup>68</sup>

#### 1751 **Caveats**

1752 1. Solar, wind and nuclear generation were only recorded since 2015 by the National Bureau Statistics  
1753 of China.

1754 2. This indicator set does not provide information on the air pollutant emissions displaced due to the  
1755 increasing share of renewable generation.

#### 1756 **Future Form of Indicator**

1757 Detailed data of provinces should be updated to get the accurate regional results.

#### 1758 **Additional Information**

1759 The hydropower accounted for a large share of low-carbon and renewable electricity from 2010 to 2014,  
1760 the only low-carbon electricity in China is hydropower. From 2015 to 2021, the share of hydropower in  
1761 low-carbon electricity was ranging from 74.1% to 49.1% in a descending trend, showing other sourced  
1762 power are on the rising trend, especially the share of solar power in the low-carbon electricity increasing  
1763 over 4 times, from 2.5% in 2015 to 12% in 2021. And the share of wind power in the low-carbon  
1764 electricity had increased nearly 2 times, from 12.2 % in 2015 to 24% in 2021. The share of nuclear power  
1765 was on the rise trend, increasing from 2.9% in 2015 to 4.9% in 2021 of the total power generation.

1766 In 2021, renewable energy increased by 11.5 % while hydropower decreased by 1.1% compared to 2020.  
1767 But, in 2021, the hydropower in Northeast, East, and Southwest region increased by 8.4%, 2% and 2%,  
1768 respectively in 2021 and in North, South central, and Northwest region decreased by 8.4%, 6% and 9.8%,  
1769 respectively. The Southern region (i.e. Southwest and South central) generated more hydropower than  
1770 Northern provinces. The percentage of hydropower in South central and Southwest was around 24.4%

1771 and 65.7% on average during 2010 and 2021. It is mainly because there are more rivers, better favorable  
 1772 and preferable terrain and a more humid climate in the Southern area of China than the Northern area.  
 1773 However, it should be noted that in Northwest China, its hydropower is also abundant, 16.2% on average  
 1774 of the total power generation from 2010 to 2021, comparing to 0.9%, 6.7% and 4.5% in North, Northeast  
 1775 and East region

1776 The share of renewable energy in the Southwest region was higher than the national average level due to  
 1777 its dominant share of hydropower. There were 68.1%, 4.5% and 2.1% from hydropower, wind and solar  
 1778 generation, respectively in 2021 in the Southwest region. Since 2019, the share of renewable energy in  
 1779 the South-central region was below the national average due to the descending share of hydropower, but  
 1780 since 2017, the share of renewable energy in the Northwest region had started to be beyond the national  
 1781 average due to the rapid increase of wind and solar power although the decreasing share of hydropower.  
 1782 From 2017 to 2021, the wind and solar power had increasing by 1.2 and 1.9 times, respectively.

1783 In 2021, the wind power increased predominately by 40.5% and South central increased 72% of wind  
 1784 power. Northeast China provided the largest output of wind power in 2021, taking up 23.5% and Inner  
 1785 Mongolia ranked the largest among provinces. Solar power continued to increase in 2021, it increased  
 1786 by 25.5%, 22.9%, 19%, 31%, 42.8% and 24.4% in North, Northeast, East, South central, Southwest, and  
 1787 Northwest region. Northwest China is the area that provides the most solar power in China, accounting  
 1788 for 36.1% of the total solar energy in China in 2021, due to the proper and suitable natural environment  
 1789 for solar generation. Among 31 provinces of China, Qinghai Province produced the most solar power, 3  
 1790 TWh in 2021. Generally, The Northwest China generate the most wind and solar power in China in 2021  
 1791 among six regions.

1792 The detailed data of different sources of electricity generation in China and the other six regions see  
 1793 Table 18 to Table 24.

1794

1795

**Table 18 : Different sources of electricity generation in China (TWh)**

| Year | Hydropower | Nuclear | Wind   | Solar  | Thermal power | Low carbon generation | Renewable generation | Total generation |
|------|------------|---------|--------|--------|---------------|-----------------------|----------------------|------------------|
| 2010 | 7221.7     | 0       | 0      | 0      | 33319.3       | 7221.7                | 7221.7               | 40541            |
| 2011 | 6989.5     | 0       | 0      | 0      | 3833          | 6989.5                | 6989.5               | 45326.5          |
| 2012 | 8721.1     | 0       | 0      | 0      | 38928.1       | 8721.1                | 8721.1               | 47649.2          |
| 2013 | 9202.9     | 0       | 0      | 0      | 42470.1       | 9202.9                | 9202.9               | 51673            |
| 2014 | 10728.9    | 0       | 0      | 0      | 44001.1       | 10728.9               | 10728.9              | 54730            |
| 2015 | 11302.7    | 1707.9  | 1857.7 | 387.8  | 42841.9       | 15256.1               | 13548.2              | 58098            |
| 2016 | 11840.5    | 2132.9  | 2370.7 | 615.9  | 44370.7       | 16959.9               | 14827                | 61330.6          |
| 2017 | 11978.6    | 2480.7  | 2972.3 | 1063.4 | 47546         | 18495                 | 16014.3              | 66041            |
| 2018 | 12317.9    | 2943.6  | 3659.7 | 1775.2 | 50963.2       | 20696.4               | 17752.8              | 71659.6          |
| 2019 | 13044.4    | 3483.5  | 4060.3 | 2244.3 | 52201.5       | 22832.5               | 19314                | 75034            |
| 2020 | 13550.1    | 3662    | 4667.1 | 2612   | 51742         | 24491.2               | 20829                | 76261            |
| 2021 | 13401      | 4075    | 6556   | 3270   | 56463         | 27302                 | 23227                | 83765            |

1796

1797

**Table 19 : Different sources of electricity generation in North China (TWh)**

| Year | Hydropower | Nuclear | Wind | Solar | Thermal | Low | Renewable | Total |
|------|------------|---------|------|-------|---------|-----|-----------|-------|
|------|------------|---------|------|-------|---------|-----|-----------|-------|

|      | wer  | r |       |       | l power | carbon generati on | ble generati on | generati on |
|------|------|---|-------|-------|---------|--------------------|-----------------|-------------|
| 2010 | 46.6 | 0 | 0     | 0     | 4851.7  | 46.6               | 46.6            | 4898.3      |
| 2011 | 46.4 | 0 | 0     | 0     | 5391.4  | 46.4               | 46.4            | 5437.8      |
| 2012 | 52.9 | 0 | 0     | 0     | 557.3   | 52.9               | 52.9            | 5625.9      |
| 2013 | 54.7 | 0 | 0     | 0     | 5832.3  | 54.7               | 54.7            | 5887        |
| 2014 | 51.1 | 0 | 0     | 0     | 5924.1  | 51.1               | 51.1            | 5975.1      |
| 2015 | 46   | 0 | 280.8 | 13.3  | 56485   | 340.1              | 340.1           | 5988.6      |
| 2016 | 72.1 | 0 | 338.7 | 42.2  | 5764.6  | 453                | 453             | 6217.6      |
| 2017 | 69.3 | 0 | 423.3 | 127.5 | 6259    | 620                | 620             | 6879.1      |
| 2018 | 63.8 | 0 | 506.3 | 231.7 | 6806    | 801.8              | 801.8           | 7607.8      |
| 2019 | 75.8 | 0 | 556.2 | 324   | 6900.4  | 956                | 956             | 7856.4      |
| 2020 | 62.2 | 0 | 637.5 | 362   | 6671.6  | 1061.7             | 1061.7          | 7733.3      |
| 2021 | 57   | 0 | 960   | 454.4 | 6845.6  | 1471.4             | 1471.4          | 8317        |

1798

1799

**Table 20 : Different sources of electricity generation in Northeast China (TWh)**

| Year | Hydropower | Nuclear | Wind   | Solar | Thermal power | Low carbon generati on | Renewable generati on | Total generati on |
|------|------------|---------|--------|-------|---------------|------------------------|-----------------------|-------------------|
| 2010 | 188.3      | 0       | 0      | 0     | 4614.2        | 188.3                  | 188.3                 | 4802.5            |
| 2011 | 123.8      | 0       | 0      | 0     | 5262.9        | 123.8                  | 123.8                 | 5386.8            |
| 2012 | 138        | 0       | 0      | 0     | 5493.1        | 138                    | 138                   | 5631.2            |
| 2013 | 229.9      | 0       | 0      | 0     | 5840.1        | 229.9                  | 229.9                 | 6069.9            |
| 2014 | 171.9      | 0       | 0      | 0     | 6336.1        | 171.9                  | 171.9                 | 658               |
| 2015 | 144        | 144.7   | 657.1  | 59.2  | 6172.7        | 1004.9                 | 860.2                 | 7177.6            |
| 2016 | 173.8      | 199.8   | 757.4  | 8     | 6170.2        | 1219                   | 1019.2                | 7389.2            |
| 2017 | 134.9      | 236     | 871    | 130.7 | 6598.9        | 1372.6                 | 1136.6                | 7971.5            |
| 2018 | 159.7      | 301.6   | 1025.5 | 205.6 | 7171.4        | 1692.4                 | 1390.8                | 8863.8            |
| 2019 | 196.1      | 327.3   | 1103.5 | 277.2 | 7722.1        | 1904.1                 | 1576.8                | 9626.2            |
| 2020 | 201.2      | 322     | 1203.8 | 348.2 | 7689.8        | 2075.2                 | 1753.2                | 9765              |
| 2021 | 218.2      | 405.9   | 1538   | 428   | 7828.6        | 2590.1                 | 2184.2                | 10418.8           |

1800

1801

**Table 21 : Different sources of electricity generation in East China (TWh)**

| Year | Hydropower | Nuclear | Wind | Solar | Thermal power | Low carbon generati on | Renewable generati on | Total generati on |
|------|------------|---------|------|-------|---------------|------------------------|-----------------------|-------------------|
| 2010 | 826.4      | 0       | 0    | 0     | 11966.2       | 826.4                  | 826.4                 | 12792.5           |
| 2011 | 548.7      | 0       | 0    | 0     | 13491.1       | 548.7                  | 548.7                 | 14039.7           |
| 2012 | 806.9      | 0       | 0    | 0     | 13539.8       | 806.9                  | 806.9                 | 14346.7           |

|      |        |        |       |       |         |        |        |         |
|------|--------|--------|-------|-------|---------|--------|--------|---------|
| 2013 | 753.6  | 0      | 0     | 0     | 14864.4 | 753.6  | 753.6  | 15618   |
| 2014 | 826.1  | 0      | 0     | 0     | 15787.6 | 826.1  | 826.1  | 16613.7 |
| 2015 | 941.6  | 952.4  | 260.2 | 59.2  | 15563.3 | 2213.4 | 1261   | 17776.7 |
| 2016 | 1211.8 | 1066.5 | 370   | 129   | 16611.9 | 2777.2 | 1710.7 | 19389.1 |
| 2017 | 913.5  | 1243.4 | 462.7 | 248.9 | 17881   | 2868.4 | 1625   | 20749.4 |
| 2018 | 743.2  | 1511.5 | 598   | 531.8 | 18527.8 | 3384.4 | 1872.9 | 21912.1 |
| 2019 | 953.8  | 1785.8 | 643.9 | 644.2 | 18236.3 | 4027.7 | 2241.9 | 22264   |
| 2020 | 556.9  | 1924.6 | 722.2 | 508.6 | 17943.7 | 3712.4 | 1787.8 | 21656.1 |
| 2021 | 567.9  | 2203.2 | 1161  | 605.1 | 19533.4 | 4537.3 | 2334.1 | 24070.7 |

1802

1803

**Table 22 : Different sources of electricity generation in South Central China (TWh)**

| Year | Hydropower | Nuclear | Wind  | Solar | Thermal power | Low carbon generation | Renewable generation | Total generation |
|------|------------|---------|-------|-------|---------------|-----------------------|----------------------|------------------|
| 2010 | 2695.5     | 0       | 0     | 0     | 6737.5        | 2695.5                | 2695.5               | 9433             |
| 2011 | 2485.4     | 0       | 0     | 0     | 8059.9        | 2485.4                | 2485.4               | 10545.3          |
| 2012 | 3079       | 0       | 0     | 0     | 7784.3        | 3079                  | 3079                 | 10863.2          |
| 2013 | 2726.5     | 0       | 0     | 0     | 8553.1        | 2726.5                | 2726.5               | 11279.6          |
| 2014 | 3121       | 0       | 0     | 0     | 8279          | 3121                  | 3121                 | 11400            |
| 2015 | 3208.6     | 610.9   | 126.5 | 6.8   | 7920.2        | 3952.7                | 3341.9               | 11873            |
| 2016 | 3244.6     | 866.6   | 165.7 | 32.5  | 8012          | 4309.4                | 3442.9               | 12321.4          |
| 2017 | 3232.7     | 1001.3  | 217   | 88    | 8565.6        | 4538.9                | 3537.6               | 13104.5          |
| 2018 | 3125.8     | 1130.5  | 291.9 | 206.3 | 9436.1        | 4754.5                | 3624                 | 14190.7          |
| 2019 | 3047.7     | 1370.5  | 373.9 | 265.3 | 9590.9        | 5057.3                | 3686.9               | 14648.2          |
| 2020 | 3164.8     | 1415.3  | 481.8 | 264.4 | 9345          | 5326.4                | 3911                 | 14671.3          |
| 2021 | 2974.9     | 1465.9  | 828.5 | 346.5 | 10883.8       | 5615.9                | 4150                 | 16499.7          |

1804

1805

**Table 23 : Different sources of electricity generation in Southwest China (TWh)**

| Year | Hydropower | Nuclear | Wind  | Solar | Thermal power | Low carbon generation | Renewable generation | Total generation |
|------|------------|---------|-------|-------|---------------|-----------------------|----------------------|------------------|
| 2010 | 2629.2     | 0       | 0     | 0     | 2423.1        | 2629.2                | 2629.2               | 5052.3           |
| 2011 | 2931.3     | 0       | 0     | 0     | 2567.6        | 2931.3                | 2931.3               | 5498.9           |
| 2012 | 3646.5     | 0       | 0     | 0     | 2451.5        | 3646.5                | 3646.5               | 6098             |
| 2013 | 4333.2     | 0       | 0     | 0     | 2750.5        | 4333.2                | 4333.2               | 7083.7           |
| 2014 | 5513.1     | 0       | 0     | 0     | 2477.6        | 5513.1                | 5513.1               | 7990.7           |
| 2015 | 5903.4     | 0       | 143.6 | 9.4   | 2164.4        | 6056.4                | 6056.4               | 8220.7           |
| 2016 | 6159.9     | 0       | 233   | 30.9  | 2201.3        | 6423.8                | 6423.8               | 8625.1           |
| 2017 | 6549.8     | 0       | 302.3 | 56.7  | 2220.3        | 6908.9                | 6908.9               | 9129.2           |
| 2018 | 6888       | 0       | 351.5 | 83.7  | 2513.7        | 7323.2                | 7323.2               | 9836.9           |
| 2019 | 7252       | 0       | 405.8 | 112   | 2723.1        | 7769.8                | 7769.8               | 10492.9          |
| 2020 | 8054.2     | 0       | 458.7 | 177.9 | 2725          | 8690.7                | 8690.7               | 11415.8          |

|      |        |   |       |     |        |        |        |         |
|------|--------|---|-------|-----|--------|--------|--------|---------|
| 2021 | 8217.3 | 0 | 545.9 | 254 | 3051.2 | 9017.2 | 9017.2 | 12068.4 |
|------|--------|---|-------|-----|--------|--------|--------|---------|

1806

1807

**Table 24 : Different sources of electricity generation in Northwest China (TWh)**

| Year | Hydropower | Nuclear | Wind   | Solar  | Thermal power | Low carbon generation | Renewable generation | Total generation |
|------|------------|---------|--------|--------|---------------|-----------------------|----------------------|------------------|
| 2010 | 835.8      | 0       | 0      | 0      | 2726.6        | 835.8                 | 835.8                | 3562.4           |
| 2011 | 853.8      | 0       | 0      | 0      | 3564.2        | 853.8                 | 853.8                | 4418             |
| 2012 | 997.8      | 0       | 0      | 0      | 4086.5        | 997.8                 | 997.8                | 5084.3           |
| 2013 | 1105.1     | 0       | 0      | 0      | 4629.7        | 1105.1                | 1105.1               | 5734.7           |
| 2014 | 1045.7     | 0       | 0      | 0      | 5196.9        | 1045.7                | 1045.7               | 6242.6           |
| 2015 | 1059.2     | 0       | 389.5  | 240    | 5372.8        | 1688.7                | 1688.7               | 7061.4           |
| 2016 | 978.3      | 0       | 505.9  | 293.3  | 5610.8        | 1777.5                | 1777.5               | 7388.2           |
| 2017 | 1078.4     | 0       | 696.1  | 411.7  | 6021.1        | 2186.2                | 2186.2               | 8207.3           |
| 2018 | 1337.5     | 0       | 886.5  | 516.2  | 6508.2        | 2740.1                | 2740.1               | 9248.3           |
| 2019 | 1519       | 0       | 977.1  | 621.5  | 7028.7        | 3117.6                | 3117.6               | 10107.7          |
| 2020 | 1513.8     | 0       | 1522.6 | 949.8  | 7394.9        | 3624.5                | 3624.5               | 11019.4          |
| 2021 | 1365.6     | 0       | 1522.6 | 1181.9 | 8320.3        | 4070.2                | 4070.2               | 12390.5          |

1808

1809

The total power generation increased by a larger rate in 2021 (9.8%) relative to 2020 (4.1%), primarily due to the rapid increase of thermal power in 2021 (9.1%), over 10 times than 2020 (0.8%)<sup>71-73</sup>.

1810

1811

The trend of low-carbon electricity in China and six regions are generally on the rise, from 2015 to 2020, with an average annual increase rate of 9.9% nationally (**Error! Reference source not found.**)<sup>71-73</sup>.

1812

1813

In 2021, the increase rate of low-carbon electricity was 11.5%, compared to 7.4% in 2020 and 10.2% in 2019, making its share as 32.6% in 2021, increased 0.5 percent compared to 2020 and 1.5 percent compared to 2019<sup>72-74</sup>. In 2021, renewable electricity also increased by 11.5%, which was 1.5 times

1814

1815

1816

than the increase rate of 2020 (7.8%), making its share in the total power generation as 27.7% in 2021<sup>71-73</sup>.

1817

1818

In 2021, the increase of wind power generation made a large stride, soaring by 40.5%, compared to 15.1% in 2020. The solar (3.9% of the total generation ) and nuclear power (4.9%) generation continued to increase ; solar power still kept an unprecedented rate with 25.2% and nuclear power increased by 11.3% in 2021<sup>71-73</sup>. However, hydropower decreased by 1.1% than 2020. The renewable electricity in the North, Northeast, East, South central, Southwest, and Northwest region in 2021 increased by 38.6% (due to the rapid increase (50.6%) of wind power in 2021), 24.6%, 30.6%, 6.1%, 3.8% and 12.3%, respectively than 2020 (Figure 33). The Southwest region had the largest share of low-carbon electricity (68.1%) owing to the predominant share of hydropower (66.8%) but it had the least share of renewable electricity yet the growth rate of solar power (42.8% in 2021) ranked the top among six regions.

1819

1820

1821

1822

1823

1824

1825

1826

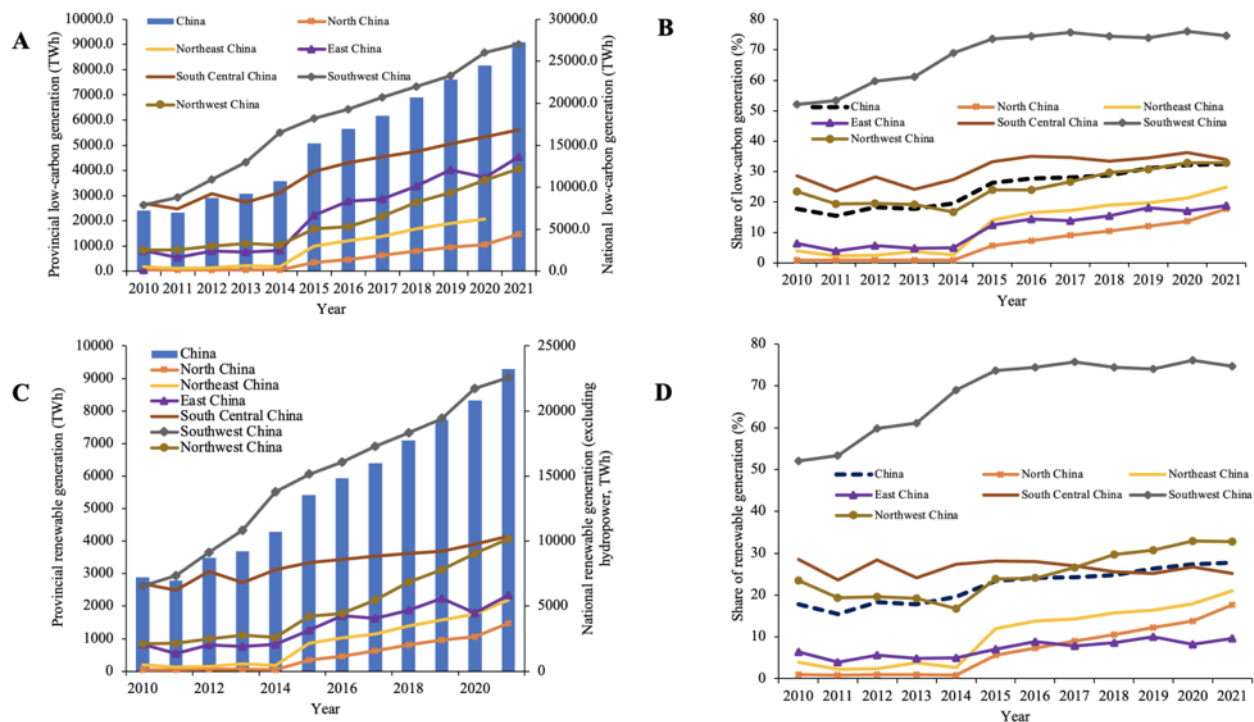

1827

1828 **Figure 33: Renewable and low-carbon emission electricity generation**

1829 **(A) Electricity generated from low-carbon sources. (B) Share of electricity generated from**  
 1830 **low-carbon sources. (C) Electricity generated from renewable sources (excluding**  
 1831 **hydropower). (D) Share of electricity generated from renewable sources (excluding**  
 1832 **hydropower). TWh=terawatt hour**

1833

1834 **Indicator 3.2: Clean household energy**

1835 **Methods**

1836 This indicator is modelled with household investigation data compiled by National Bureau of Statistics  
 1837 and Institute for Health Metrics and Evaluation<sup>75</sup>. The statistical analysis was used as the major method.

1838 Compared to the methods used in the 2021 Report, the new report mainly focused on the difference  
 1839 among age and gender.

1840 **Data**

1841 1. The per capital household energy consumption and population data are from the China Statistical  
 1842 Yearbook 2001-2021.

1843 2. The health impact data of household air pollution from solid fuels are from the Global Burden of  
 1844 Disease Study (GBD) (2019).

1845 3. The age-related data are from the China Health and Retirement Longitudinal Study (CHARLS) (2018).

1846 **Caveats**

1847 The caveats of this indicator would mainly be in two aspects. First, the regional difference should not be  
1848 neglected considering the difference in climate and economics. Second, the health impact data from  
1849 literature were collected before the COVID-2019 outbreak. More recent and adequate data should be  
1850 further collected.

### 1851 **Additional Information**

1852 This indicator reports household energy consumption using the National Bureau of Statistics data. Per  
1853 capita household energy consumption has increased significantly, by 235% from 3.9GJ in 2000 to 13.0  
1854 GJ in 2019. The year-on-year growth rate of per capita household energy was 1.8% in 2019, down three  
1855 percentage points from 2018. While the urban per capita household energy was 2.4 times that in rural  
1856 areas in the 2000s, the latter increased rapidly and reached the same level in 2016. The per capital coal  
1857 consumption, reported as the preferred energy source as the substitution of biomass for rural residents<sup>76</sup>,  
1858 maintained a rapid downward trend with a decline of 14.5% in 2019 while liquefied petroleum gas  
1859 consumption had reduced 10.2%.

1860 The household air pollution from solid fuels is estimated to cause 36.3 thousand deaths in China in 2019,  
1861 equating to 258 deaths per million people. The household air pollution from solid fuels related mortality  
1862 rate increases with age. For middle-aged and older people, the mortality rate increases sharply. The  
1863 mortality rate for people over 65 (1464 per million) is 5.7 times the average, while people over 80 (3450  
1864 per million) is even 13.4 times. Compared to non-solid fuels, solid fuel use significantly increases the  
1865 possibility of chronic lung diseases (30%), exacerbation of chronic lung diseases (95%), seizure of heart  
1866 disease (1.80 times), decreases self-evaluated health status of the elderly (1.38 times) and decreases  
1867 cognitive function equivalent to differences between individuals who were 3.3 years apart<sup>77,78</sup>.

1868 Solid fuels were more widely used for cooking in rural areas (40.2% of 13860 samples) than in urban  
1869 areas (5.6% of 3936 samples). In urban areas, thanks to the popularity of non-solid energy, there was no  
1870 significant difference in the proportion of the elderly using solid fuel compared with the middle-aged. In  
1871 rural areas, 47.5% of the elderly chose solid fuels as their energy sources for cooking, which was 11.4%  
1872 higher than people under 65 and 20.6% than people under 50. Families with no child but at least an  
1873 elderly member have a 10.3% lower probability of choosing clean fuels as their primary cooking fuel in  
1874 rural areas<sup>79</sup>. The related field survey was conducted by stratified random sampling in July and August  
1875 2016. Six villages in Qihe County (Dezhou City, Shandong Province) and four in Wuqiang County  
1876 (Hengshui City, Hebei Province) were selected.

1877

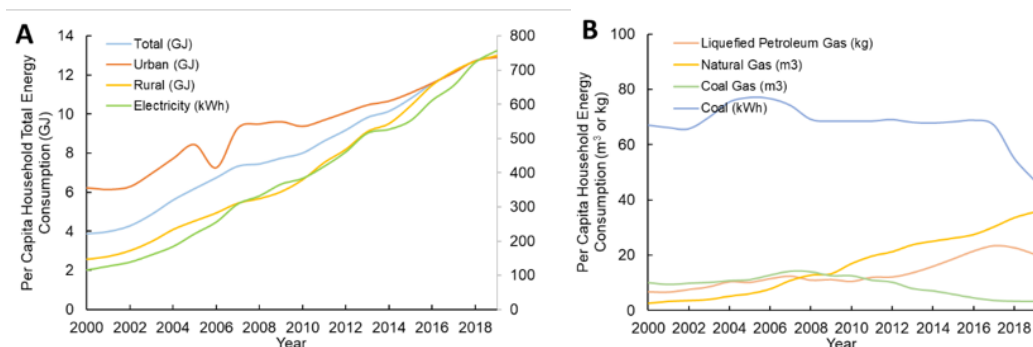

1878

1879 **Figure 34: Development of Household Energy Consumption in China**

1880

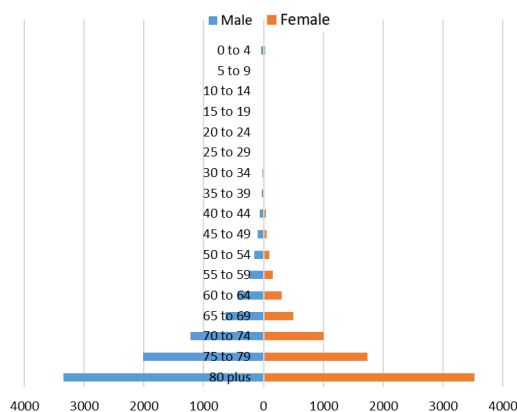

1881 **Figure 35: Household air pollution from solid fuels related deaths per million people from all**  
 1882 **ages**  
 1883  
 1884

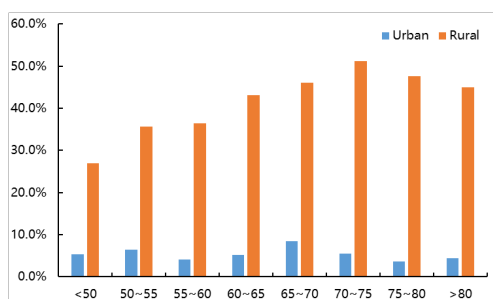

1885 **Figure 36: Proportion of solid fuels usage for cooking of people from all ages in urban and rural**  
 1886 **areas**  
 1887  
 1888

1889 **Indicator 3.3: Air pollution, energy, and transport**

1890 **Indicator 3.3.1: Exposure to air pollution in cities**

1891 **Methods**

1892 This indicator reports the trends of annual air pollutant concentrations in China’s cities based on  
 1893 monitoring data. The distribution of city-specific annual average PM2.5 and annual daily maximum 8-  
 1894 hour average (ADMA8) ozone concentrations is illustrated based on the ground-monitoring data during  
 1895 2015-2021 in China.

1896 **Data**

1897 Daily ground-monitoring PM2.5 and ozone data during 2015-2020 is from the Data Center of Ministry  
 1898 of Ecology and Environment of China<sup>80</sup> and the data in 2021 was from National Urban Air Quality Real-  
 1899 time Release Platform of China National Environmental Monitoring Centre (<https://air.cnemc.cn:18007/>).  
 1900 Referring to ‘Technical Regulation for Ambient Air Quality Assessment’ (HJ 633-2013) and Ambient  
 1901 air quality standard (GB 3095-2012), the city-specific annual average PM2.5 concentration is calculated  
 1902 by arithmetic mean of daily 24-hour average PM2.5 concentrations, and the value of the 90th percentile  
 1903 of daily maximum 8-hour average ozone concentrations DMA8 is set to be AMDA8.17,18



1904 The 2015 city-level population data are collected from the National Economic and Social Development  
 1905 Bulletin. The 2015 population structure data at province levels are from the China Population and  
 1906 Employment Statistics Yearbook. The 2020 city-level population data and province-level population  
 1907 structure data are derived from the 7th national population census of China.19

1908 **Caveats**

1909 333 prefecture-level administrative cities and four municipalities of mainland China are considered. Due  
 1910 to the lack of monitoring data, the annual average PM<sub>2.5</sub> concentrations and AMDA8 ozone  
 1911 concentrations of Danzhou, Bayingolin and Sansha between 2015-2020 are set to be none. In 2021, the  
 1912 annual average PM<sub>2.5</sub> concentrations of Sansha, the AMDA8 ozone concentrations of Changzhou and  
 1913 Sansha are set to be none.

1914 **Additional Information**

1915

1916 **Table 25: Statistics for annual average PM<sub>2.5</sub> concentrations for China's cities.**

| Year | Minimum<br>( $\mu\text{g}/\text{m}^3$ ) | Median<br>( $\mu\text{g}/\text{m}^3$ ) | Maximum<br>( $\mu\text{g}/\text{m}^3$ ) | Number of cities with annual<br>average PM <sub>2.5</sub><br>concentration >35 $\mu\text{g}/\text{m}^3$ |
|------|-----------------------------------------|----------------------------------------|-----------------------------------------|---------------------------------------------------------------------------------------------------------|
| 2015 | 10                                      | 49                                     | 118                                     | 260                                                                                                     |
| 2016 | 11                                      | 44                                     | 157                                     | 240                                                                                                     |
| 2017 | 10                                      | 42                                     | 100                                     | 232                                                                                                     |
| 2018 | 8                                       | 38                                     | 116                                     | 195                                                                                                     |
| 2019 | 7                                       | 35                                     | 110                                     | 168                                                                                                     |
| 2020 | 6                                       | 32                                     | 113                                     | 136                                                                                                     |
| 2021 | 7                                       | 30                                     | 94                                      | 118                                                                                                     |

1917

1918 **Table 26: Statistics for ADMA8 ozone concentrations for China's cities.**

| Year | Minimum<br>( $\mu\text{g}/\text{m}^3$ ) | Median<br>( $\mu\text{g}/\text{m}^3$ ) | Maximum<br>( $\mu\text{g}/\text{m}^3$ ) | Number of cities with ADMA8<br>ozone concentration >100 $\mu\text{g}/\text{m}^3$ |
|------|-----------------------------------------|----------------------------------------|-----------------------------------------|----------------------------------------------------------------------------------|
| 2015 | 62                                      | 135                                    | 202                                     | 307                                                                              |
| 2016 | 74                                      | 138                                    | 200                                     | 311                                                                              |
| 2017 | 78                                      | 146                                    | 219                                     | 326                                                                              |
| 2018 | 74                                      | 147                                    | 215                                     | 328                                                                              |
| 2019 | 82                                      | 146                                    | 208                                     | 326                                                                              |
| 2020 | 94                                      | 136                                    | 194                                     | 324                                                                              |
| 2021 | 94                                      | 134                                    | 197                                     | 328                                                                              |

1919

1920 **Table 27: Elderly population (aged 65+) exposed to PM<sub>2.5</sub> and ozone pollution.**

|                   |                              | Elderly population (million person) |           | Change | Change rate |
|-------------------|------------------------------|-------------------------------------|-----------|--------|-------------|
|                   |                              | Year 2015                           | Year 2020 |        |             |
| PM <sub>2.5</sub> | >5 $\mu\text{g}/\text{m}^3$  | 141.8                               | 188.8     | 47.1   | +33.2%      |
|                   | >35 $\mu\text{g}/\text{m}^3$ | 124.2                               | 96.8      | -27.3  | -22.0%      |

|       |                               |       |       |      |        |
|-------|-------------------------------|-------|-------|------|--------|
| Ozone | >100 $\mu\text{g}/\text{m}^3$ | 135.3 | 186.7 | 51.4 | +38.0% |
|       | >160 $\mu\text{g}/\text{m}^3$ | 41.2  | 53.7  | 12.5 | +30.4% |

1921

1922 **Indicator 3.3.2: Premature mortality from ambient air pollution by sector**

1923 **Methods**

1924 This indicator quantifies the number of premature deaths attributable to long-term ambient fine  
1925 particulate matter (PM<sub>2.5</sub>) exposure by sectorial sources for each province in China. The greenhouse  
1926 gas-air pollution interactions and synergies (GAINS) model<sup>81</sup> is used to quantify the sectorial  
1927 contribution to ambient PM<sub>2.5</sub>. Data from the International Energy Agency (IEA) World Energy  
1928 Outlook 2021<sup>82</sup> and the data of Chinese statistical yearbook in 2021 and China energy statistical yearbook  
1929 2020 are integrated into GAINS to develop the provincial air pollution emission inventory by fuels and  
1930 sectors. National total energy consumption matches the IEA statistics (merged World Energy  
1931 Model/statistics for 2020), while the provincial pattern relies on the Chinese statistical yearbook data.  
1932 Activity data is combined with GAINS internal information on application of emission control  
1933 technologies in each region and their emission factors to calculate emissions of PM<sub>2.5</sub> and its precursor  
1934 gases SO<sub>2</sub>, NO<sub>x</sub>, NH<sub>3</sub>, and non-methane VOC.

1935 Ambient PM<sub>2.5</sub> concentrations are calculated from the region and sector specific emissions by applying  
1936 atmospheric transfer coefficients, which are a linear approximation of full chemistry-transport models.  
1937 Atmospheric transfer coefficients in GAINS are based on full year perturbation simulations with the  
1938 EMEP Chemistry Transport Model<sup>83</sup> at 0.1°×0.1° resolution (for low-level sources) / 0.5°×0.5°  
1939 resolution (for all other sources) using meteorology of 2015.

1940 We also made a validation between ambient annual PM<sub>2.5</sub> concentration of the GAINS and the official  
1941 data released by the Chinese government.

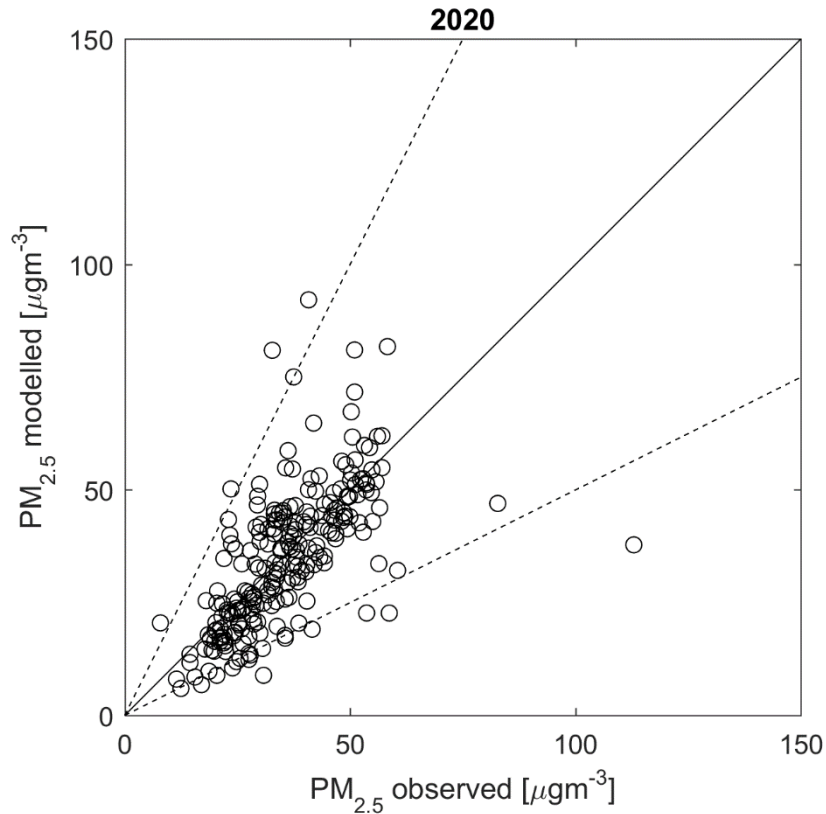

1942

1943 **Figure 37.** Validation between ambient annual PM<sub>2.5</sub> concentration of the GAINS model

1944 Premature deaths from total ambient PM<sub>2.5</sub> by provinces and sectors in China are calculated using the  
 1945 methodology of the Global Burden of Disease 2019, which relies on cause-specific concentration-  
 1946 response functions to calculate relative risk (RR) for mortality for six causes of death.

1947 The MR-BRT curves were obtained from the public release site<sup>84</sup> and relative risks for six diseases  
 1948 IHD, COPD, stroke, lung cancer, ALRI, and type 2 diabetes calculated from them. We used 1000  
 1949 draws of the MRBRT curve for each disease and age group (where age specific) and scaled them to  
 1950 have RR=1 at the theoretical minimum-risk exposure level (taken from 1000 corresponding draws,  
 1951 average 4.15µgm<sup>-3</sup>). Exposure levels below the TMREL level are assigned RR=1.

1952

1953 The concentration-response (C-R) functions and relative risks [Eq. (1)] were based on the MR-BRT  
 1954 functions from the GBD 2019 across the full range of PM<sub>2.5</sub> concentrations. RR<sub>IER</sub>(Z represents the  
 1955 relative risks in the PM<sub>2.5</sub> exposure concentration of C (in micrograms per meter cubed); C<sub>0</sub> represents  
 1956 the counterfactual concentration below which it is assumed there is no additional risk. For very large C,  
 1957 RR<sub>IER</sub>(Z) approximates 1+α. A power of PM<sub>2.5</sub>, δ, was included here to predict risk over a very large  
 1958 range of concentrations.

1959 
$$RR_{IER}(Z) = \begin{cases} 1, & \text{for } C < C_0 \\ 1 + \alpha \{1 - \exp[-\gamma(C - C_0)^\delta]\}, & \text{for } C \geq C_0 \end{cases} \quad (1)$$

1960 We adopted a calculation approach [Eq. (2)] developed for the GBD 2019 to estimate PM<sub>2.5</sub>-related  
 1961 premature mortality in each province of China, and the following five endpoints are included in our  
 1962 estimation: ischemic heart disease (IHD), chronic obstructive pulmonary disease (COPD), lung cancer

1963 (LC), and stroke in adults, and acute lower respiratory infections (ALRI) in children less than 5 years  
1964 old. For IHD and stroke, the RR is different between age strata, and for COPD and LC, the RR in the  
1965 same exposure concentration is the same for the entire group of adults (aged 25 or more). We estimated  
1966 the premature mortality  $M_{i,j}$  of each province (and of each age stratum for IHD and stroke) and disease  
1967 endpoint  $j$  attributable to ambient  $PM_{2.5}$  for Province  $i$ .

$$1968 \quad M_{i,j} = P_i \times \hat{I}_j \times (RR_j(C_i) - 1), \text{ where } \hat{I}_j = \frac{I_j}{RR_j} \quad (2)$$

1969  $\hat{I}_j$  represents the hypothetical “underlying incidence” (i.e., cause-specific mortality rate) that would  
1970 remain if  $PM_{2.5}$  concentrations were reduced to the theoretical minimum risk concentration. Here,  $P_i$  is  
1971 the population of province  $i$ ,  $I_j$  is the reported regional average annual disease incidence (mortality) rate  
1972 for endpoint  $j$ ,  $C_i$  represents the annual-average  $PM_{2.5}$  concentration in county  $i$ ,  $RR_j(C_i)$  is the relative  
1973 risk for end point  $j$  at concentration  $C_i$ , and  $RR_j$  represents the average population-weighted relative risk  
1974 for end point  $j$ .

### 1975 **Data**

- 1976 1. Emissions data was developed using the IEA World Energy Outlook 2021, the Chinese statistical  
1977 yearbook in 2021, and the China energy statistical yearbook 2020.
- 1978 2. Provincial air pollution emission inventory by fuels and sectors was from GAINS model;
- 1979 3. Provincial demographic and mortality data was from Chinese statistical yearbook in 2015 and 2021;
- 1980 4. Baseline mortality data was obtained from the results of GBD 2019 studies;
- 1981 5. The RR value and estimated parameters were from GBD 2019.

### 1982 **Caveats**

1983 There are three key caveats of this indicator. Firstly, the annual mean  $PM_{2.5}$  concentration for each  
1984 province was calculated from GAINS model, the health effects related to air pollution are calculated  
1985 based on provincial concentration rather than grid data. Finally,  $PM_{2.5}$  from various sources used the  
1986 same C-R function and RR, so the estimated results may deviate from the actual situation to some extent.

1987

1988

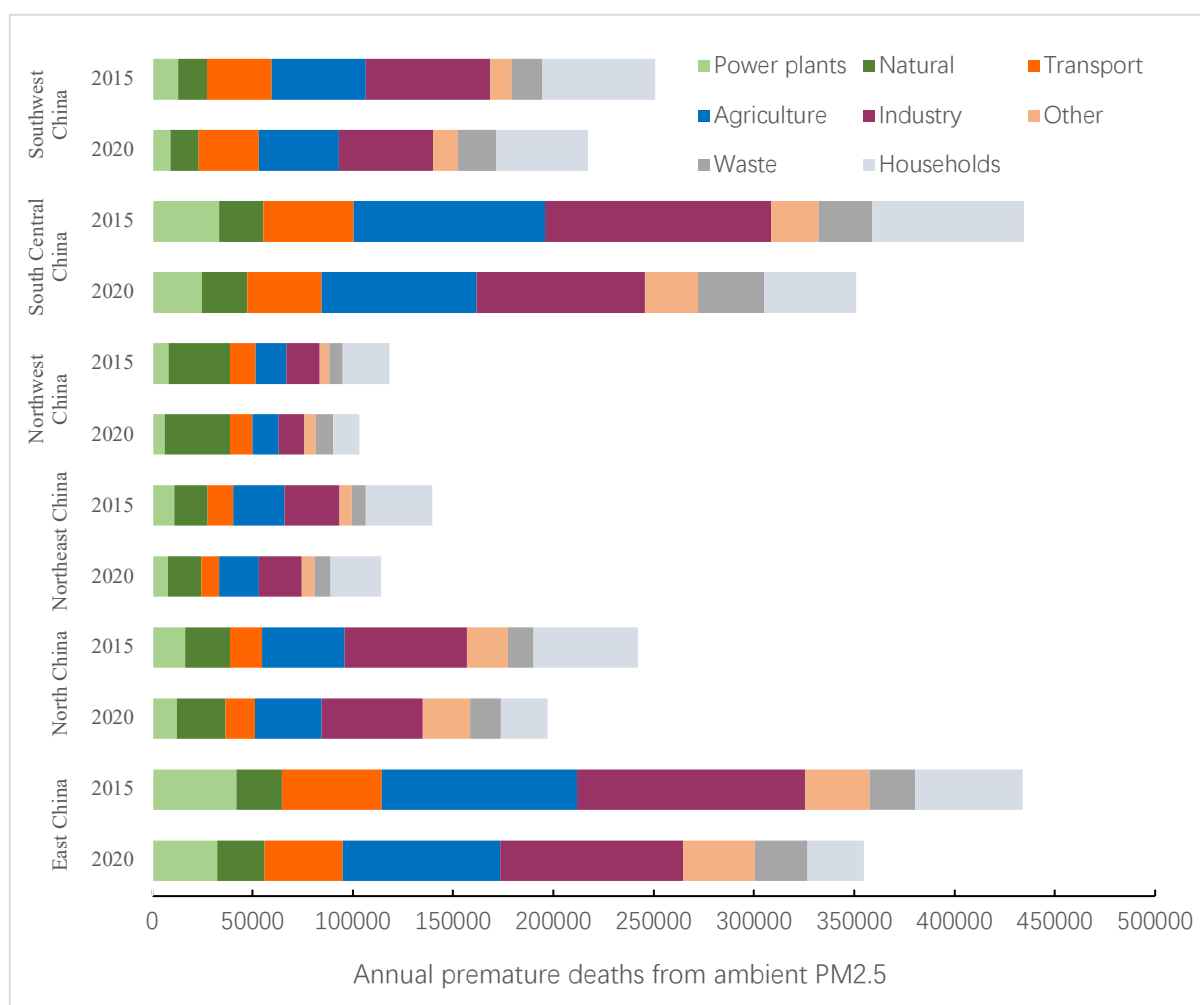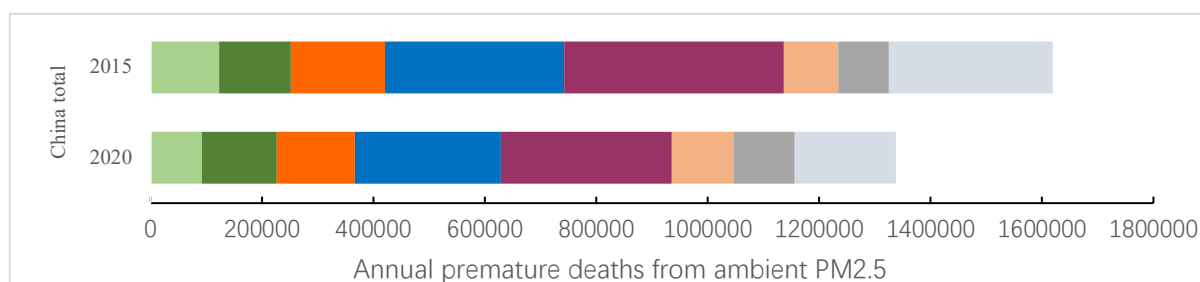

**Figure 38: Premature deaths attributable to PM<sub>2.5</sub> by regions and sectors between 2015 and 2020**

1989

1990

1991

1992

1993 **Indicator 3.3.3: Sustainable and healthy transportation**

1994 **Methods**

1995 This indicator contains three components:

- 1996 1. Emission intensity of freight transportation, indicating the road-freight induced emission per freight tonne-kilometer of major pollutants (CO, HC, NO<sub>x</sub>, and PM) from 2010 to 2021 for China;
- 1997

1998 2. Emission intensity of passenger transportation, indicating the road-passenger induced emission per  
1999 passenger-kilometer;

2000 3. Emission intensity of private car, indicating the average emission per private car.

2001 The emission of each sector  $s$  including freight transportation, passenger transportation and private car  
2002 is calculated as below:

$$2003 \quad E_{s,i,y} = P_{s,y} * EF_{s,i,y} * VKT_s$$

2004 where  $i$  represents the pollutants including CO, HC, NO<sub>x</sub>, and PM,  $y$  represents the year,  $P$   
2005 represents the vehicle ownership,  $EF$  represents the emission factor, and  $VKT$  represents the vehicle  
2006 kilometers of travel.

### 2007 **Data**

2008 1. Vehicle ownership data is from National Bureau of Statistics of China<sup>85</sup>.

2009 2. The vehicle kilometers of travel are from Guide for Emission Inventory of Air Pollutants from On-  
2010 Road Vehicles <sup>86</sup>.

2011 3. The emission factor data is from Guide for Emission Inventory of Air Pollutants from On-Road  
2012 Vehicles <sup>86</sup>, Grigoratos' study <sup>87</sup> and Zhang's study <sup>88</sup>.

### 2013 **Additional Information**

2014 From the perspective of freight transportation, benefiting from the implementation of several air pollution  
2015 control strategies by the Chinese government, the road freight emissions were effectively controlled and  
2016 decreased year by year (**Figure 39**), while the freight tonne-kilometer rose by 59.2% from 2010 to 2021.  
2017 Therefore, the emission intensities of carbon monoxide (CO), hydrocarbon (HC), nitrogen oxide (NO<sub>x</sub>),  
2018 and particulate matter (PM) all showed a downward trend during this period, dropping by 64.5%, 77.9%,  
2019 69.0%, 90.0%, respectively. The emission intensity for passenger transportation also declined sharply  
2020 before 2020 due to the stricter emission standards. Affected by the COVID-19, the limitation on travel  
2021 greatly reduced the value of passenger-kilometer, however, passenger vehicles were still be arranged on  
2022 most necessary routes, with a high empty load rate. Thus, the reduction in emission from passenger  
2023 vehicles was not matched by the reduction in road passenger-kilometer in 2020 and 2021. For private  
2024 cars, the emission intensities for four pollutants were effectively controlled and decreased by about  
2025 80.0%, the control on emission of PM from private cars still needed to be strengthen since it will bring  
2026 adverse effects on human health <sup>89</sup>. **In addition, new energy vehicles (NEVs) have been adopted and**  
2027 **promoted by governments in China in recent years <sup>90-92</sup>, which is reported to alleviate urban air quality**  
2028 **problem such as NO<sub>2</sub> <sup>92</sup>. By 2020, the population of NEVs in China reached 4.92 million, accounting for**  
2029 **1.75% of the total vehicle population <sup>93</sup>. In the future, China should continue to promote and increase the**  
2030 **use of NEVs in cities. This can not only address the air pollution problems, but also reduce fossil energy**  
2031 **consumption to ensure China's energy security.**

2032

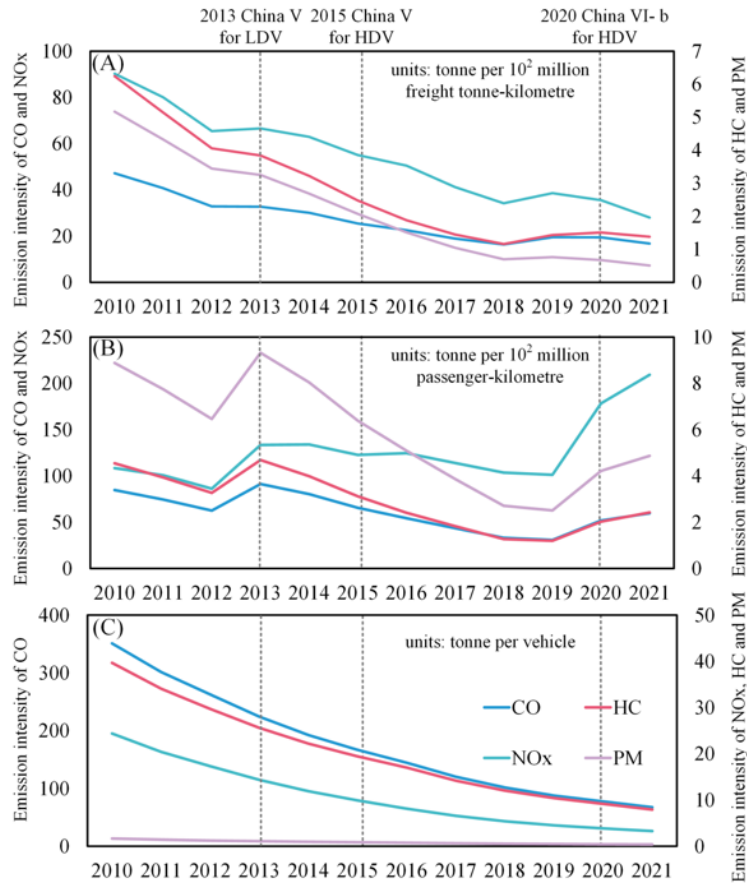

2033

2034

2035

2036

2037

**Figure 39: The air pollution emission intensity of (A) road freight transportation, (B) road passenger transportation and (C) private cars in China from 2010 to 2021 for CO, HC, NO<sub>x</sub>, and PM.**

**Table 28: The freight tonne-kilometer and passenger-kilometer in China from 2010 to 2021**

| Year | Freight tonne-kilometer<br>(billion freight tonne-kilometre) | Passenger-kilometer<br>(billion passenger-kilometre) |
|------|--------------------------------------------------------------|------------------------------------------------------|
| 2010 | 4338.967                                                     | 1502.081                                             |
| 2011 | 5137.474                                                     | 1676.025                                             |
| 2012 | 5953.486                                                     | 1846.755                                             |
| 2013 | 5573.808                                                     | 1125.094                                             |
| 2014 | 5684.69                                                      | 1099.675                                             |
| 2015 | 5795.572                                                     | 1074.266                                             |
| 2016 | 6108.01                                                      | 1022.871                                             |
| 2017 | 6677.152                                                     | 976.518                                              |
| 2018 | 7124.921                                                     | 927.968                                              |
| 2019 | 5963.639                                                     | 885.708                                              |
| 2020 | 6017.185                                                     | 464.101                                              |
| 2021 | 6908.77                                                      | 362.75                                               |

2038

2039

2040 **Section 4: Economics and Finance**

2041 **Indicator 4.1.1: Economic costs of heatwave-related mortality**

2042 **Methods**

2043 Different from the 2021 report which just estimated the economic costs of heatwave-related mortality of  
 2044 working-age people, this year’s indicator was updated to reflect the trend of ageing. We monetized value  
 2045 of heatwave-related all-aged mortality through value of a statistical life to reflect the trend of ageing.  
 2046 Using the heatwave-related working age mortality data provided by WG1 as the input, we used the  
 2047 Chinese IO tables available for eight years (2002, 2005, 2007, 2010, 2012, 2015, 2017, 2018) for national  
 2048 economic costs analysis. Assuming a fixed input-output relationship in 2018, 2019, 2020, and 2021 the  
 2049 evaluation on national level was extended to 2021. We used a multi-regional IO table in 2017 for  
 2050 provincial analysis. Using the heatwave-related all-aged mortality data provided by WG1 and value of a  
 2051 statistical life, we monetized each death in China across time.

2052 For direct losses for each sector, we assumed the heatwave-related working age mortality rate equals to  
 2053 the direct loss rate of workers' compensation. The direct loss was then put in assessing model to estimate  
 2054 the overall economic cost for each year. Comparing the overall and direct losses gives the estimated  
 2055 indirect losses resulting from inter-dependence relationship among sectors and regions.

2056 **Data**

- 2057 1. Heatwave-related mortality data is provided by WG1;
- 2058 2. The Chinese IO tables for eight years came from the website of the National Bureau of Statistics of  
 2059 China<sup>94</sup>;
- 2060 3. The Chinese multi-regional IO table for 2017 is obtained from the CEADs dataset<sup>95</sup>.

2061 **Caveats**

2062 The caveats of this indicator would mainly be in three aspects.

2063 First, the input-output analysis framework has assumed no market-based price adjustment and  
 2064 substitution of inputs, which implies the costs may be overestimated. Second, due to data available, the  
 2065 analysis is only performed at specific years with accessible IO tables. Third, the impact of COVID-19  
 2066 on heatwave-related mortality as well as the impact of COVID-19 on the economic costs of heatwave-  
 2067 related mortality are not studied due to lack of data.

2068 **Additional information**

2069 **Table 29: National direct and indirect economic losses from heatwave-related labor-aged**  
 2070 **mortality (US\$ million, \$2020)**

| Years | Primary       |                 | Secondary     |                 | Tertiary      |                 |
|-------|---------------|-----------------|---------------|-----------------|---------------|-----------------|
|       | Direct losses | Indirect losses | Direct losses | Indirect losses | Direct losses | Indirect losses |
| 2002  | 1.15          | 1.7             | 1.96          | 7.7             | 2.05          | 3.9             |
| 2005  | 2.15          | 3.1             | 2.98          | 14.7            | 2.86          | 6.1             |
| 2007  | 1.84          | 2.6             | 3.22          | 16.4            | 2.63          | 5.3             |



|      |      |     |       |      |       |      |
|------|------|-----|-------|------|-------|------|
| 2010 | 3.01 | 4.3 | 5.98  | 32.0 | 5.92  | 11.1 |
| 2012 | 1.68 | 2.4 | 3.32  | 16.9 | 3.63  | 7.1  |
| 2015 | 2.37 | 3.4 | 4.37  | 25.7 | 6.49  | 12.5 |
| 2017 | 5.02 | 7.1 | 11.04 | 54.2 | 17.73 | 33.5 |
| 2018 | 3.87 | 5.3 | 8.87  | 42.9 | 15.24 | 28.9 |
| 2019 | 4.33 | 6.0 | 9.94  | 48.1 | 17.08 | 32.4 |
| 2020 | 3.51 | 4.9 | 8.06  | 39.0 | 13.84 | 26.3 |
| 2021 | 4.02 | 5.6 | 9.23  | 44.6 | 15.85 | 30.1 |

2071

2072 **Table 30: Provincial economic loss in 2017 (US\$ million, \$2020)**

| Provinces | Economic loss | Provinces      | Economic loss | Provinces | Economic loss |
|-----------|---------------|----------------|---------------|-----------|---------------|
| Beijing   | 2.10          | Tianjin        | 3.21          | Hebei     | 5.45          |
| Shanxi    | 3.00          | Inner Mongolia | 6.68          | Liaoning  | 5.09          |
| Jilin     | 3.75          | Heilongjiang   | 3.55          | Shanghai  | 1.08          |
| Jiangsu   | 3.78          | Zhejiang       | 3.02          | Anhui     | 1.59          |
| Fujian    | 1.48          | Jiangxi        | 2.29          | Shandong  | 4.71          |
| Henan     | 7.57          | Hubei          | 1.29          | Hunan     | 3.23          |
| Guangdong | 3.09          | Guangxi        | 1.01          | Hainan    | 0.45          |
| Chongqing | 4.63          | Sichuan        | 0.84          | Guizhou   | 2.83          |
| Yunnan    | 2.87          | Tibet          | 0.07          | Shaanxi   | 4.87          |
| Gansu     | 8.01          | Qinghai        | 0.13          | Ningxia   | 3.68          |
| Xinjiang  | 5.23          |                |               |           |               |

2073

2074 **Table 31: National economic losses from heatwave-related all-aged mortality (US\$ billion, \$2020)**

2075

| Years | Economic loss | Years | Economic loss |
|-------|---------------|-------|---------------|
| 2002  | 7.0           | 2012  | 5.1           |
| 2003  | 5.1           | 2013  | 10.9          |
| 2004  | 5.7           | 2014  | 6.0           |
| 2005  | 8.5           | 2015  | 4.9           |
| 2006  | 7.6           | 2016  | 8.4           |
| 2007  | 6.1           | 2017  | 13.5          |
| 2008  | 3             | 2018  | 10.1          |
| 2009  | 7.8           | 2019  | 11.1          |
| 2010  | 9.5           | 2020  | 8.4           |
| 2011  | 6.7           | 2021  | 9.3           |

2076

2077

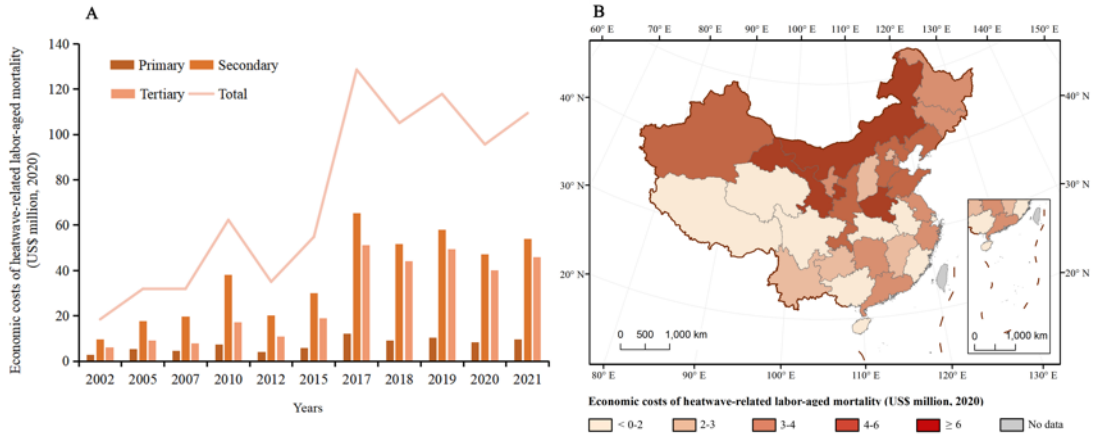

2078

2079

**Figure 40: Economic costs of heatwave-related labor-aged mortality (US\$ million, 2020).**

2080

**(A) National economic losses; (B) Provincial economic loss in 2017**

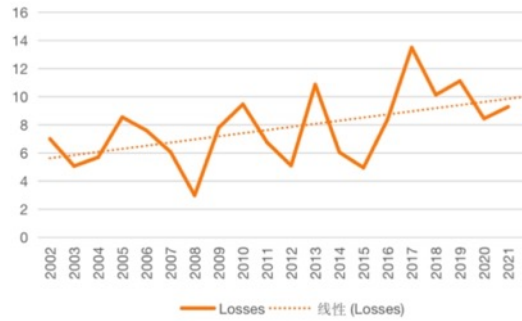

2081

2082

**Figure 41: Economic costs of heatwave-related all-aged mortality (US\$ billion, 2020).**

2083

2084

**Indicator 4.1.2: Economic costs of heat-related labour productivity loss**

2085

**Methods**

2086

In the 2022 report we use the same method, which is under the Adaptive Regional Input-Output (ARIO) framework<sup>96</sup>, to evaluate the economic costs or losses of heat-related labour productivity loss, air pollution-related premature deaths and climate-related extreme events. This is consistent with indicator 4.1.4 and a full description of the model is provided in the appendix of the 2021 report.

2090

Without capital damage caused by heat stress or air pollution, we mainly consider the reduction in labour input and its rippling effect through the production supply chain. Therefore, unlike indicator 4.1.4, the direct costs in indicators 4.1.2 and 4.1.3 are defined by the first-order losses of value added due to labour capacity loss and the indirect costs are the higher-order losses of value added resulting from the rippling effect along the inter-sectoral and inter-regional trade linkages.

2095

First for the production module, we use  $\gamma_{ir}^L$  to indicate the proportion of labour productivity loss due to heat stress in sector  $i$  of region  $r$ . This input is obtained from WG1 responsible for indicator 1.1.2. Then the remaining productive capacity of labour in each sector at time  $t$  is:

2098

$$x_{ir}^L(t) = \alpha_{ir}(t) \times (1 - \gamma_{ir}^L(t)) \times \bar{x}_{ir}. \quad (1)$$

2099 Here  $\bar{x}_{ir}$  is the output of sector  $i$  in region  $r$  at the pre-disaster level, which can be obtained from  
 2100 the Input-Output (IO) tables used.  $\alpha_{ir}(t)$  represents the level of overproduction capacity of the sector  
 2101 due to the input shortage at time  $t$ . It is expressed as a percentage of the pre-disaster output level and  
 2102 usually greater than 100% during the input shortage. The dynamic adjustment of the overproduction  
 2103 capacity follows the principles in Hallegatte<sup>97</sup>.

2104 Assuming the Leontief production function, the maximum production capacity  $x_{ir}^{\max}(t)$  can be  
 2105 expressed as:

$$2106 \quad x_{ir}^{\max}(t) = \min \{x_{ir}^L(t); \text{ for all } j, x_{ir}^j(t)\}. \quad (2)$$

2107 Here we do not consider the capital productivity constraint as there is basically no capital  
 2108 damage during the heat stress.  $x_{ir}^j(t)$  is the production level of sector  $i$  in region  $r$  that  
 2109 the inventory of the intermediate input from sector  $j$  can support at time  $t$ , which is  
 2110 expressed as below:

$$2111 \quad x_{ir}^j(t) = \frac{S_{ir}^j(t-1)}{a_{j,ir}}. \quad (3)$$

2112 Here  $S_{ir}^j(t-1)$  refers to the amount of intermediate product  $j$  held by sector  $i$  in region  $r$  at the  
 2113 end of the time  $t-1$ .  $a_{j,ir}$  is the technical coefficient indicating the amount of intermediate input  $j$   
 2114 required to produce one unit of product  $i$  in region  $r$ , which can be obtained from the IO tables used.

2115 The actual production of sector  $i$  in region  $r$  at each time step depends on both the maximum  
 2116 production capacity and the total orders expected to receive from the clients:

2117

2118

$$2119 \quad x_{ir}^a(t) = \min \{x_{ir}^{\max}(t), TD_{ir}(t-1)\}. \quad (4)$$

2120 Here  $TD_{ir}(t-1)$  is the total orders received by sector  $i$  in region  $r$  from its clients during the  
 2121 previous period, which is calculated in the demand module.

2122 Therefore, the inventory of product  $j$  held by the sector  $i$  in region  $r$  will be consumed during the  
 2123 production process. We use  $S_{ir}^{j,used}(t)$  to denote the amount of intermediate product  $j$  used in the  
 2124 production of sector  $i$  in region  $r$  at time  $t$ , as below:

2125

$$2126 \quad S_{ir}^{j,used}(t) = a_{j,ir} \times x_{ir}^a(t). \quad (5)$$

2127 Second, the **allocation module** is similar with the 2021 report, except that there is no reconstruction  
 2128 demand for capital recovery. This module mainly describes how suppliers allocate products to their  
 2129 clients. In the aftermath of an extreme event, the supply of a sector, including domestic products and  
 2130 imports, will not be able to fulfil all the orders of its clients due to production constraints. In this analysis

2131 we use a prioritized-proportional rationing scheme to model the resource allocation process during the  
 2132 disequilibrium period. We assume that the firm first allocates its products to address the intermediate  
 2133 demand and then proportionally allocates the remaining products to other categories of demands.

2134 To fulfil the intermediate demand, products of sector  $i$  in region  $r$  is allocated to sector  $j$  in region  
 2135  $s$  in quantities,  $FRC_{js}^{ir}(t)$ , as below:

2136

$$2137 \quad FRC_{js}^{ir}(t) = \begin{cases} \frac{FOD_{js}^{ir}(t-1)}{\sum_s \sum_j FOD_{js}^{ir}(t-1)} \times (x_{ir}^a(t) + \overline{im}_{ir}), & \text{if } x_{ir}^a(t) + \overline{im}_{ir} < \sum_s \sum_j FOD_{js}^{ir}(t-1) \\ FOD_{js}^{ir}(t-1), & \text{if } x_{ir}^a(t) + \overline{im}_{ir} \geq \sum_s \sum_j FOD_{js}^{ir}(t-1) \end{cases}. \quad (6)$$

2138 Here  $FOD_{js}^{ir}(t-1)$  refers to the orders issued by firms of sector  $j$  in region  $s$  to its suppliers of  
 2139 sector  $i$  in region  $r$  at time  $t-1$ . If the total supply, that is, the actual output plus imports, of sector  
 2140  $i$  in region  $r$  is small than its expected total orders from downstream sectors,  $\sum_s \sum_j FOD_{js}^{ir}(t-1)$ , it  
 2141 will allocate all its products to the business clients in proportion to the orders. Otherwise, it will allocate  
 2142 just enough products to satisfy the expected intermediate demand. We assume that the imports of a sector  
 2143 are not significantly affected by the extreme event and remain stable at the pre-disaster level,  $\overline{im}_{ir}$ , which  
 2144 can be obtained from the IO tables used.

2145 The remaining products of sector  $i$  in region  $r$ , after satisfying the intermediate demand, at time step  
 2146  $t$ , is equal to:

$$2147 \quad x_{ir}^{rem}(t) = x_{ir}^a(t) + \overline{im}_{ir} - \sum_s \sum_j FRC_{js}^{ir}(t). \quad (7)$$

2148 Then, the remaining products will be proportionally allocated to the final demand. The final demand  
 2149 mainly consists of four types, that is, household consumption, government expenditure, fixed capital  
 2150 formation and exports. The quantities of products of sector  $i$  in region  $r$  allocated to the  $k$ th type of  
 2151 final demand in region  $h$ ,  $HRC_{kh}^{ir}(t)$ , are expressed as follows:

$$2152 \quad HRC_{kh}^{ir}(t) = \frac{HOD_{kh}^{ir}(t-1)}{\sum_k \sum_h HOD_{kh}^{ir}(t-1)} \times x_{ir}^{rem}(t). \quad (8)$$

2153 Here  $HOD_{kh}^{ir}(t-1)$  refers to the orders issued by the  $k$ th type of final users in region  $h$  to its  
 2154 suppliers of sector  $i$  in region  $r$  at time  $t-1$ .

2155 Then, sector  $j$  in region  $s$  receives intermediates from all regions to restore its inventories of product  
 2156  $i$  at time step  $t$ , as below:

$$2157 \quad S_{js}^{i,restored}(t) = \sum_r FRC_{js}^{ir}(t). \quad (9)$$

2158 Therefore, the quantities of intermediates  $i$  held by sector  $j$  in region  $s$  at the end of period  $t$  are  
 2159 as below:

$$2160 \quad S_{js}^i(t) = S_{js}^i(t-1) - S_{js}^{i,used}(t) + S_{js}^{i,restored}(t). \quad (10)$$

2161 Third, the **demand module** is also similar with the 2021 report considering the possibility of demand  
 2162 readdressing according to the cross-regional substitutability. At the end of each period downstream  
 2163 clients issue orders to their suppliers according to their production and consumption plans for the next  
 2164 period. When a product comes from multiple suppliers, the orders are redistributed among suppliers from  
 2165 different regions according to their production capacities.

2166 A firm issues orders to its suppliers because of the need to restore its intermediate product inventory. We  
 2167 assume that the firm of sector  $j$  in region  $s$  has a specific targeted inventory level of product  $i$ ,  
 2168  $S_{js}^{i,G}(t)$ , equal to a given number of days,  $n_{js}^i$ , of intermediate consumption of product  $i$ , based on its  
 2169 maximum production capacity at time step  $t$ , which is calculated as below:

$$2170 \quad S_{js}^{i,G}(t) = n_{js}^i \times a_{i,j,s} \times x_{js}^{\max}(t). \quad (11)$$

2171 To fill the gap between the targeted and the actual inventory levels of intermediate product  $i$ , the firm  
 2172 of sector  $j$  in region  $s$  will allocate its orders among the suppliers of product  $i$  in different regions  
 2173 based on their production capacities. Then the order issued by the firm of sector  $j$  in region  $s$  to its  
 2174 supplier of sector  $i$  in region  $r$  is equal to:

$$2175 \quad FOD_{js}^{ir}(t) = \begin{cases} (S_{js}^{i,G}(t) - S_{js}^i(t)) \times \frac{\overline{FOD}_{js}^{ir} \times x_{ir}^a(t)}{\sum_r \overline{FOD}_{js}^{ir} \times x_{ir}^a(t)}, & \text{if } S_{js}^{i,G}(t) > S_{js}^i(t) \\ 0, & \text{if } S_{js}^{i,G}(t) \leq S_{js}^i(t) \end{cases}. \quad (12)$$

2176 Here  $\overline{FOD}_{js}^{ir}$  is the intermediate demand of sector  $j$  in region  $s$  for inputs of sector  $i$  in region  
 2177  $r$  at the pre-disaster level, which can be obtained from the IO tables used.

2178 Similarly, final users (i.e., domestic households, governments, investors, and foreign consumers) allocate  
 2179 orders among their suppliers from different regions based on their demand and the production capacities  
 2180 of their suppliers. The targeted amount of the  $k$ th type of final demand in region  $h$  for product  $i$  at  
 2181 time  $t$  is obtained by adding up the demand from different regions at the pre-disaster levels, as below:

$$2182 \quad HOD_{kh}^{i,*}(t) = \sum_r \overline{HOD}_{kh}^{ir}. \quad (13)$$

2183 Here  $\overline{HOD}_{kh}^{ir}$  is the  $k$ th type of final demand in region  $h$  for product  $i$  in region  $r$  at the pre-  
 2184 disaster equilibrium, which can be obtained from the IO tables used. We assume that various types of  
 2185 final demand do not shift significantly in the short run after the extreme event.

2186 Then, the orders issued by the  $k$ th type of final users of region  $h$  to the suppliers of product  $i$  in  
 2187 region  $r$  is as below:

2188 
$$HOD_{kh}^{ir}(t) = HOD_{kh}^{i,*}(t) \times \frac{\overline{HOD}_{kh}^{ir} \times x_{ir}^a(t)}{\sum_r \overline{HOD}_{kh}^{ir} \times x_{ir}^a(t)}. \quad (14)$$

2189 Therefore, the total orders received by sector  $i$  in region  $r$  are:

2190 
$$TD_{ir}(t) = \sum_s \sum_j FOD_{js}^{ir}(t) + \sum_k \sum_h HOD_{kh}^{ir}(t). \quad (15)$$

2191 At each time step the economic agents on the supply and demand sides go through the above production,  
2192 allocation, inventory recovery, and demand adjustment procedures, through which the value added of  
2193 each sector is:

2194 
$$va_{ir}(t) = x_{ir}^a(t) - \sum_j \sum_s a_{js,ir} \times x_{ir}^a(t). \quad (16)$$

2195 Here  $a_{js,ir}$ , which is drawn from the IO tables, is the technical coefficient that indicates the amount of  
2196 input from sector  $j$  in region  $s$  required to produce one unit of output of sector  $i$  in region  $r$ .

2197 Finally, the heat-related total economic costs  $TC_{ir}$ , direct costs  $DC_{ir}$ , and indirect costs  $IC_{ir}$  of each  
2198 sector and region are calculated as below:

2199 
$$TC_{ir} = \sum_t (\overline{va}_{ir} - va_{ir}(t)), \quad (17)$$

2200 
$$DC_{ir} = \sum_t (1 - \gamma_{ir}^L(t)) \times \overline{va}_{ir}, \quad (18)$$

2201 and 
$$IC_{ir} = TC_{ir} - DC_{ir}. \quad (19)$$

2202 Here  $\overline{va}_{ir}$  is the value added of sector  $i$  in region  $r$  at the initial level, which can be obtained  
2203 from the IO tables used.

## 2204 Data

2205 1. The IO tables used for this indicator are from the same sources and processed in the same way as  
2206 the 2021 report. The Chinese national IO tables are obtained from the website of the National Bureau  
2207 of Statistics of China.<sup>98</sup> The national IO tables are only available for the years of 2012, 2015, 2017,  
2208 and 2018, so we use the tables of the closest year to approximate the years without IO tables after  
2209 scaling the tables used to the GDPs of the relevant years. The Chinese multi-regional IO table in  
2210 2017 is obtained from the CEADs dataset<sup>99</sup> and scaled to the year 2021 according to the ratio of  
2211 GDPs between 2017 and 2021. All the IO tables used in this analysis are converted from current  
2212 LCU prices into constant US\$ in 2020. The economy is divided into 20 production sectors in each  
2213 IO table, as listed in the right column of Table 32. Variables including the constant technical  
2214 coefficients and sectoral value added, outputs, imports, intermediate demands, and final demands at  
2215 the initial or pre-disaster levels are obtained from the IO tables used through basic calculations.

2216 **Table 32: Sector concordance.**

|             |             |
|-------------|-------------|
| Agriculture | Agriculture |
|-------------|-------------|

|              |                                 |
|--------------|---------------------------------|
|              | Mining                          |
|              | Foods and Tobacco               |
|              | Textiles                        |
|              | Timbers and Furniture           |
|              | Paper and Printing              |
|              | Petroleum, Coking, Nuclear Fuel |
|              | Chemicals                       |
| Manufacture  | Non-metallic Mineral Products   |
|              | Metal Products                  |
|              | Ordinary Machinery              |
|              | Transport Equipment             |
|              | Electrical Equipment            |
|              | Electronic Equipment            |
|              | Other Manufacturing Industry    |
|              | Electricity, Gas, Water         |
| Construction | Construction                    |
|              | Transport                       |
| Services     | Wholesale, Retail, Catering     |
|              | Other Services                  |

2217 2. Data on heat-related labour productivity loss is provided by WG1 responsible for indicator 1.1.2. It  
2218 is calculated as percentage losses of annual working hours in four major sectors, including  
2219 agricultural, construction, manufacturing, and services sectors, on both the national and provincial  
2220 scales. We categorize the 20 sectors in the IO tables into the four major sectors (Table 32) and  
2221 assume that sectors within the same categories share the same levels of heat-related labour  
2222 productivity loss.

2223 3. China's GDPs and currency exchange rates of the relevant years are obtained from China Statistical  
2224 Yearbook 2021<sup>85</sup> and China's 2021 Statistical Bulletin on National Economics and Social  
2225 Development<sup>100</sup>.

## 2226 **Caveats**

2227 See indicator 1.1.2 for caveats related to the calculation of heat-related labour productivity loss.

2228 The adoption of the ARIO model incorporates the possibilities of inventory adjustment and substitution  
2229 between sectors, which increases the flexibility and resilience of the economy, but it assumes that the  
2230 imports and final demand remain unchanged during the heat stress and mainly focuses on the supply  
2231 chain propagation effects initiated by labour productivity loss.

## 2232 **Future Form of Indicator**

2233 This indicator will be updated annually with well-established China's IO tables on both the national and  
2234 provincial scales.

2235

2236 **Additional Information**

2237 **Table 33: China's economic costs from heat-related labour productivity loss by sector and year.**  
 2238 **The direct and indirect costs are given in billions of US\$ at 2020 prices, and the relative costs are**  
 2239 **given as percentages of China's GDP.**

| Year | Direct costs    |                 |                  |              | Indirect costs  |                 |                  |              | % GDP |
|------|-----------------|-----------------|------------------|--------------|-----------------|-----------------|------------------|--------------|-------|
|      | Agricu<br>lture | Manuf<br>acture | Constr<br>uction | Servic<br>es | Agricu<br>lture | Manuf<br>acture | Constr<br>uction | Servic<br>es |       |
| 2012 | 24.0            | 7.5             | 35.8             | 0.4          | 2.3             | 20.6            | 0.2              | 32.0         | 1.27% |
| 2013 | 33.4            | 14.9            | 53.7             | 2.2          | 3.9             | 30.8            | 0.3              | 49.8         | 1.77% |
| 2014 | 27.4            | 13.7            | 25.6             | 1.3          | 3.6             | 33.8            | 0.2              | 46.8         | 1.33% |
| 2015 | 26.2            | 12.8            | 25.3             | 0.7          | 3.5             | 33.3            | 0.2              | 46.2         | 1.23% |
| 2016 | 37.8            | 27.2            | 39.3             | 6.1          | 6.3             | 51.6            | 0.4              | 72.8         | 2.00% |
| 2017 | 35.9            | 37.8            | 40.4             | 5.2          | 4.3             | 66.1            | 0.2              | 66.3         | 1.97% |
| 2018 | 38.4            | 36.6            | 47.8             | 2.8          | 4.5             | 75.1            | 0.3              | 76.8         | 1.97% |
| 2019 | 34.2            | 32.6            | 41.3             | 4.6          | 3.9             | 65.0            | 0.2              | 65.4         | 1.71% |
| 2020 | 32.5            | 29.7            | 41.6             | 2.5          | 3.9             | 65.3            | 0.2              | 65.7         | 1.64% |
| 2021 | 40.2            | 34.2            | 49.1             | 2.2          | 4.5             | 77.3            | 0.3              | 78.0         | 1.68% |

2240

2241 **Table 34: China's economic costs at the provincial level, in percent of regional GDP, from heat-**  
 2242 **related labour productivity loss in 2021.**

| Provinces      | Direct costs | Indirect costs | Total costs |
|----------------|--------------|----------------|-------------|
| Beijing        | 0.04%        | 0.52%          | 0.56%       |
| Tianjin        | 0.14%        | 0.54%          | 0.67%       |
| Hebei          | 0.37%        | 0.47%          | 0.85%       |
| Shanxi         | 0.06%        | 0.57%          | 0.64%       |
| Inner Mongolia | 0.05%        | 0.50%          | 0.55%       |
| Liaoning       | 0.20%        | 0.33%          | 0.53%       |
| Jilin          | 0.13%        | 0.39%          | 0.52%       |
| Heilongjiang   | 0.21%        | 0.37%          | 0.58%       |
| Shanghai       | 0.57%        | 0.83%          | 1.40%       |
| Jiangsu        | 0.75%        | 0.63%          | 1.38%       |
| Zhejiang       | 0.95%        | 0.73%          | 1.69%       |
| Anhui          | 0.95%        | 0.94%          | 1.89%       |
| Fujian         | 1.06%        | 1.01%          | 2.07%       |
| Jiangxi        | 1.83%        | 1.51%          | 3.33%       |
| Shandong       | 0.40%        | 0.49%          | 0.90%       |
| Henan          | 0.65%        | 0.79%          | 1.45%       |
| Hubei          | 1.20%        | 1.10%          | 2.30%       |
| Hunan          | 1.36%        | 1.22%          | 2.58%       |
| Guangdong      | 1.41%        | 1.14%          | 2.55%       |
| Guangxi        | 2.29%        | 1.58%          | 3.86%       |
| Hainan         | 3.09%        | 1.66%          | 4.75%       |



|           |       |        |        |
|-----------|-------|--------|--------|
| Chongqing | 0.83% | 0.66%  | 1.49%  |
| Sichuan   | 0.47% | 0.39%  | 0.86%  |
| Guizhou   | 0.34% | 0.53%  | 0.87%  |
| Yunnan    | 0.14% | 0.15%  | 0.29%  |
| Tibet     | 0.57% | 0.31%  | 0.88%  |
| Shaanxi   | 0.20% | 0.51%  | 0.70%  |
| Gansu     | 0.02% | 0.22%  | 0.24%  |
| Qinghai   | 0.00% | -0.10% | -0.10% |
| Ningxia   | 0.04% | 0.23%  | 0.27%  |
| Xinjiang  | 0.07% | 0.30%  | 0.37%  |
| Macao     | Null  | Null   | Null   |
| Hong Kong | Null  | Null   | Null   |
| Taiwan    | Null  | Null   | Null   |
| Total     | 0.74% | 0.74%  | 1.48%  |

2243

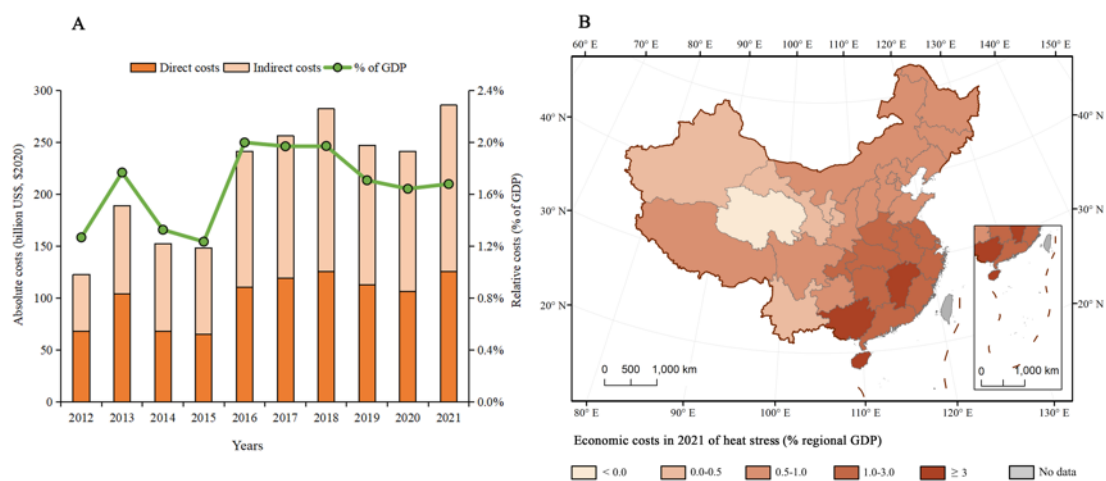

2244

2245

**Figure 42: Economic costs of heat-related labour productivity loss.**

2246

**(A) National-level results, by year, in billions of 2020 US\$; (B) Provincial-level results in 2021, relative to provincial GDPs.**

2247

**Note: Negative values indicate economic gains from inter-provincial trade.**

2248

2249

2250

### Indicator 4.1.3: Economic costs of air pollution-related premature deaths

2251

#### Methods

2252

This indicator measures the direct and indirect economic costs of PM<sub>2.5</sub>-related premature deaths, using the same method as indicator 4.1.2. Compared with the previous year, the results are updated to year 2020.

2253

2254

2255

The main calculation procedures are as follows:

2256

1. The calculations are first performed on the national scale for two years 2015 and 2020 using the national IO tables, and then on the provincial scale for year 2020 using the multi-regional IO table.

2257

The national table of 2018 and the multi-provincial table of 2017 are scaled up to 2020 according to

2258

2259 the ratios of GDP between 2018 and 2020 and between 2017 and 2020 respectively. This is because  
2260 the national and multi-provincial IO tables of 2020 are not available at the time of writing. All the  
2261 IO tables used in this indicator are converted from current LCU prices into constant US\$ in 2020.  
2262 The economy is divided into 20 production sectors in each IO table, as listed in the right column of  
2263 Table 32.

2264 2. The percentage losses of labour productivity in the three industries (i.e., primary, secondary, and  
2265 tertiary) are derived from the sectoral results of PM<sub>2.5</sub>-related premature deaths in Indicator 3.3,  
2266 using the same method as the 2021 report. The relative labour losses in the three industries are then  
2267 disaggregated into the 20 production sectors according to the sector concordance in Table 32 (the  
2268 construction sector belongs to the secondary industry), assuming that sectors within the same  
2269 industry have the same level of PM<sub>2.5</sub>-related labour productivity loss.

2270 3. Finally, the relative labour losses are fed into the assessing model same as Indicator 4.1.2 to calculate  
2271 the direct and indirect economic costs of PM<sub>2.5</sub>-related premature deaths.

## 2272 **Data**

2273 1. The IO tables used for this indicator are from the same sources as the 2021 report. The Chinese  
2274 national IO tables are obtained from the website of the National Bureau of Statistics of China.<sup>98</sup> The  
2275 Chinese multi-regional IO table is obtained from the CEADs dataset.<sup>99</sup> Variables including the  
2276 constant technical coefficients and sectoral value added, outputs, imports, intermediate demands,  
2277 and final demands at the initial or pre-disaster levels are obtained from the IO tables used through  
2278 basic calculations.

2279 2. Data on PM<sub>2.5</sub>-related premature deaths is provided by WG3 responsible for indicator 3.3.2. It is  
2280 processed in the same way as the 2021 report to calculate the percentage losses of labourers in the  
2281 three industries (i.e., primary, secondary, and tertiary).

2282 3. The numbers of national and provincial labourers by industry are collected from China Statistical  
2283 Yearbook 2021<sup>85</sup>.

2284 4. The all-cause mortalities by province and age group are collected from the sixth national population  
2285 census of China<sup>101</sup>.

2286 5. China's GDPs and currency exchange rates of the relevant years are obtained from China Statistical  
2287 Yearbook 2021<sup>85</sup>.

## 2288 **Caveats**

2289 See indicator 3.3.2, for caveats related to the calculation of premature mortality due to ambient PM<sub>2.5</sub>  
2290 pollution.

2291 The national economic costs due to PM<sub>2.5</sub>-related premature deaths in 2015 are estimated at \$9.00 billion  
2292 in the 2022 report, among which the direct and indirect costs are \$7.69 and \$1.31 billion respectively.  
2293 These results are higher than those of the same year in the 2021 report (\$6.24, \$5.84 and \$0.40 billion  
2294 respectively). This may be related to three reasons: 1) the costs are given in billions of US\$ at 2020 prices  
2295 in the 2022 report but at 2015 prices in the 2021 report; 2) compared to the number in China Statistical  
2296 Yearbook 2020, the labour size of each year after 2010 was lowered in China Statistical Yearbook 2021,  
2297 which increased the intensity of the direct labour shocks derived from PM<sub>2.5</sub>-related premature deaths; 3)  
2298 updates from indicator 3.3.2 make the PM<sub>2.5</sub>-related premature deaths in 2015 more concentrated in the  
2299 secondary industry and the adoption of the ARIIO model highlights the potential effects of supply chain  
2300 disruption, both of which increases the indirect costs caused by the same units of direct costs.

2301 Finally, this indicator considers the economic costs of mortality related to people's ability to work,  
 2302 however it does not consider the monetary value people place on life (i.e., VSL).

2303 **Future Form of Indicator**

2304 An ideal form of this indicator would reflect economic costs resulting from both mortality and morbidity  
 2305 rates of PM<sub>2.5</sub> pollution. This can be developed in future iterations of this indicator.

2306 **Additional Information**

2307 **Table 35: China's economic costs from PM<sub>2.5</sub>-related premature deaths by sector and year. The**  
 2308 **direct and indirect costs are given in billions of US\$ at 2020 prices, and the relative costs are**  
 2309 **given as percentages of China's GDP.**

| Year | Direct costs     |                    |                   | Indirect costs   |                    |                   | % GDP |
|------|------------------|--------------------|-------------------|------------------|--------------------|-------------------|-------|
|      | Primary industry | Secondary industry | Tertiary industry | Primary industry | Secondary industry | Tertiary industry |       |
| 2015 | 0.72             | 3.70               | 3.28              | 0.16             | 0.51               | 0.64              | 0.07% |
| 2020 | 0.66             | 4.31               | 3.11              | 0.09             | 0.60               | 0.46              | 0.06% |

2310

2311 **Table 36: China's economic costs at the provincial level, in percent of regional GDP, from PM<sub>2.5</sub>-**  
 2312 **related premature deaths in 2020.**

| Provinces      | Direct costs | Indirect costs | Total costs |
|----------------|--------------|----------------|-------------|
| Beijing        | 0.032%       | 0.018%         | 0.050%      |
| Tianjin        | 0.082%       | 0.002%         | 0.084%      |
| Hebei          | 0.107%       | 0.010%         | 0.116%      |
| Shanxi         | 0.073%       | -0.001%        | 0.072%      |
| Inner Mongolia | 0.049%       | -0.001%        | 0.048%      |
| Liaoning       | 0.087%       | 0.007%         | 0.094%      |
| Jilin          | 0.064%       | 0.010%         | 0.074%      |
| Heilongjiang   | 0.058%       | 0.198%         | 0.256%      |
| Shanghai       | 0.022%       | 0.001%         | 0.023%      |
| Jiangsu        | 0.036%       | 0.001%         | 0.038%      |
| Zhejiang       | 0.018%       | 0.001%         | 0.018%      |
| Anhui          | 0.062%       | 0.050%         | 0.112%      |
| Fujian         | 0.017%       | -0.002%        | 0.015%      |
| Jiangxi        | 0.038%       | -0.001%        | 0.037%      |
| Shandong       | 0.062%       | 0.004%         | 0.065%      |
| Henan          | 0.093%       | 0.007%         | 0.101%      |
| Hubei          | 0.073%       | 0.004%         | 0.077%      |
| Hunan          | 0.068%       | 0.003%         | 0.071%      |
| Guangdong      | 0.017%       | 0.005%         | 0.022%      |
| Guangxi        | 0.036%       | -0.001%        | 0.035%      |
| Hainan         | 0.014%       | -0.005%        | 0.009%      |
| Chongqing      | 0.102%       | 0.009%         | 0.111%      |

|           |        |         |         |
|-----------|--------|---------|---------|
| Sichuan   | 0.096% | 0.009%  | 0.106%  |
| Guizhou   | 0.041% | -0.002% | 0.038%  |
| Yunnan    | 0.021% | -0.002% | 0.019%  |
| Tibet     | 0.000% | 0.005%  | 0.006%  |
| Shaanxi   | 0.076% | -0.002% | 0.074%  |
| Gansu     | 0.046% | 0.013%  | 0.059%  |
| Qinghai   | 0.058% | -0.282% | -0.223% |
| Ningxia   | 0.046% | 0.005%  | 0.051%  |
| Xinjiang  | 0.095% | 0.172%  | 0.267%  |
| Macao     | Null   | Null    | Null    |
| Hong Kong | Null   | Null    | Null    |
| Taiwan    | Null   | Null    | Null    |
| Total     | 0.054% | 0.011%  | 0.064%  |

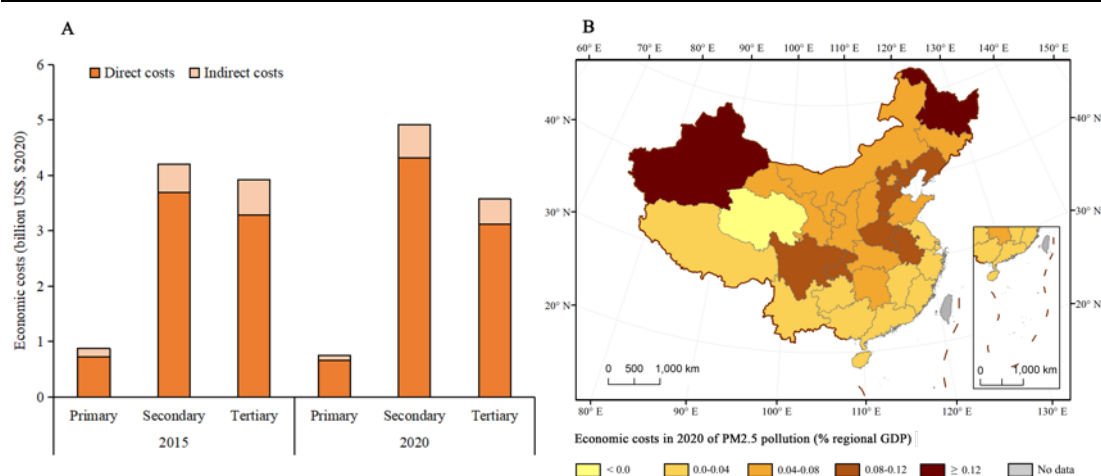

2313

2314 **Figure 43: Economic costs of PM<sub>2.5</sub>-related premature deaths.**

2315 **(A) National-level results, by year and industry, in billions of 2020 US\$; (B) Provincial-level results**

2316 **in 2020, relative to provincial GDPs.**

2317 **Note: Negative values indicate economic gains from inter-provincial dependencies.**

2318

2319 **Indicator 4.1.4: Economic losses due to climate-related extreme events**

2320 **Methods**

2321 This indicator measures both the direct and indirect economic losses of climate-related extreme events, including droughts, floods, hailstorms, thunderstorms, cyclones, blizzards and extreme low temperatures. Direct losses are the physical or tangible damage due to these events, while indirect losses or footprint refer to the subsequent losses, including business interruption losses of affected economic sectors, and the spread of losses towards other initially non-affected economic sectors, and the costs of recovery processes. The methodology for this indicator is the same with that in the 2021 report.

2327 This year we add a box to discuss the economic losses of a famous compound event in 2021 of extreme flooding and coronavirus control in the Zhengzhou city of Henan Province. A full description of the methodology of evaluating such a compound event is given by Hu, Yang<sup>102</sup>.

2330 For the evaluation of such a compound event, we included the impact of COVID control on both  
 2331 transportation capacity and labour availability in the midst of flood responses. We describe the disease  
 2332 control as different combinations of strictness and duration of lockdown measures, as in Guan, Wang <sup>103</sup>.  
 2333 We use  $\gamma_r^C(t)$  to indicate the strictness of the lockdown in the epidemic region  $r$  at time  $t$ , which  
 2334 represents the level of reduction in transportation capacity and labour availability relative to the pre-  
 2335 epidemic levels. The control measures have different effects on labour supply in different sectors. We  
 2336 set a specific multiplier  $\eta_i$  for sector  $i$  on the basis of three factors, that is, the exposure level of the  
 2337 sector's work, whether it is the lifeline and whether it is possible to work at home. Therefore, the  
 2338 epidemic-related labour productivity constraint is given by:

$$2339 \quad x_{ir}^{L,C}(t) = \alpha_{ir}(t) \times (1 - \eta_i \times \gamma_r^C(t)) \times \bar{x}_{ir}. \quad (20)$$

2340 Here  $\bar{x}_{ir}$  is the output of sector  $i$  in region  $r$  at the pre-disaster level.  $\alpha_{ir}(t)$  represents the  
 2341 level of overproduction capacity of the sector due to the input shortage at time  $t$ . It is expressed as a  
 2342 percentage of the pre-disaster output level and usually greater than 100% during the input shortage. The  
 2343 dynamic adjustment of the overproduction capacity follows the principles in Hallegatte <sup>97</sup>.

2344 On the other hand, the extreme weather events like the 2021 Zhengzhou flood can cause direct damage  
 2345 to physical assets, including both industrial and residential capital. Industrial capital is productive capital  
 2346 that is invested in production. Residential capital is not involved in production processes, but its  
 2347 restoration after a disaster would compete resources with that of industrial capital, and therefore affect  
 2348 the recovery of production. The damaged capital is recovered by the post-flood reconstruction activities.  
 2349 The capital held by firms of sector  $i$  or households in region  $r$  at time  $t$  is expressed as:

$$2350 \quad K_{ir}(t) = K_{ir}(t-1) - K_{ir}^D(t) + K_{ir}^{REC}(t-1), \quad (21)$$

$$2351 \quad \text{and} \quad K_{res,r}(t) = K_{res,r}(t-1) - K_{res,r}^D(t) + K_{res,r}^{REC}(t-1). \quad (22)$$

2352 Here  $K_{ir}(t)$  and  $K_{res,r}(t)$  are the surviving capital stock held by industrial sector  $i$  and the  
 2353 residential sector in region  $r$  at time  $t$ , respectively.  $K_{ir}^D(t)$  and  $K_{res,r}^D(t)$  refer to the amount of  
 2354 capital damaged/destroyed by the flood.  $K_{ir}^{REC}(t-1)$  and  $K_{res,r}^{REC}(t-1)$  represent the recovered capital  
 2355 at the end of period  $t-1$ , which are calculated in the allocation and recovery module.

2356 We use  $\gamma_{ir}^{K,F}(t)$  to denote the percentage reduction in productive capital of sector  $i$  in region  $r$  at  
 2357 time  $t$ , relative to the pre-disaster level, in the aftermaths of the flood. It is calculated as:

$$2358 \quad \gamma_{ir}^{K,F}(t) = \frac{\bar{K}_{ir} - K_{ir}(t)}{\bar{K}_{ir}}. \quad (23)$$

2359 Here  $\bar{K}_{ir}$  is the capital stock of sector  $i$  in region  $r$  in the pre-disaster equilibrium.

2360 Then the remaining productivity capacity of capital in each sector at time  $t$  is:

$$2361 \quad x_{ir}^{K,F}(t) = \alpha_{ir}(t) \times (1 - \gamma_{ir}^{K,F}(t)) \times \bar{x}_{ir}. \quad (24)$$

2362 **The production module** considers production constraints resulting from both the epidemic control and  
 2363 flood damage, which derives the maximum production capacity of each sector at time  $t$  as:

$$2364 \quad x_{ir}^{\max}(t) = \min \{x_{ir}^{K,F}(t); x_{ir}^{L,C}(t); \text{ for all } j, x_{ir}^j(t)\}. \quad (25)$$

2365 Here  $x_{ir}^j(t)$  is the production level of sector  $i$  in region  $r$  that the inventory of the intermediate  
 2366 input from sector  $j$  can support at time  $t$ , expressed by Equation (3) in Indicator 4.1.2. The remaining  
 2367 part of the production module, regarding the actual production  $x_{ir}^a(t)$  and the corresponding inventory  
 2368 used  $S_{ir}^{j,used}(t)$ , is also the same as Indicator 4.1.2 (see Equations (4) and (5)).

2369 Then in the **allocation and recovery module**, a new type of demand, i.e., the reconstruction demand,  
 2370 arises from the needs to repair or rebuild the damaged capital assets owned by sectors and households.  
 2371 After satisfying the intermediate demand (following the same prioritized-proportional rationing scheme  
 2372 described by Equations (6) and (7) in Indicator 4.1.2), the remaining output  $x_{ir}^{rem}(t)$  will be  
 2373 proportionally allocated to the final demand and reconstruction demand, as below:

$$2374 \quad HRC_{kh}^{ir}(t) = \frac{HOD_{kh}^{ir}(t-1)}{\sum_k \sum_h HOD_{kh}^{ir}(t-1) + \sum_j \sum_s ROD_{js}^{ir}(t-1) + \sum_h ROD_{res,h}^{ir}(t-1)} \times x_{ir}^{rem}(t), \quad (26)$$

$$2375 \quad RRC_{js}^{ir}(t) = \frac{ROD_{js}^{ir}(t-1)}{\sum_k \sum_h HOD_{kh}^{ir}(t-1) + \sum_j \sum_s ROD_{js}^{ir}(t-1) + \sum_h ROD_{res,h}^{ir}(t-1)} \times x_{ir}^{rem}(t), \quad (27)$$

$$2376 \quad \text{and} \quad RRC_{res,h}^{ir}(t) = \frac{ROD_{res,h}^{ir}(t-1)}{\sum_k \sum_h HOD_{kh}^{ir}(t-1) + \sum_j \sum_s ROD_{js}^{ir}(t-1) + \sum_h ROD_{res,h}^{ir}(t-1)} \times x_{ir}^{rem}(t). \quad (28)$$

2377 Here  $HRC_{kh}^{ir}(t)$  is the amount of output of sector  $i$  in region  $r$  allocated to the  $k$ th of the four  
 2378 types of final demands (i.e., household consumption, governmental expenditure, fixed capital  
 2379 formation, and exports) in region  $h$ .  $RRC_{js}^{ir}(t)$  and  $RRC_{res,h}^{ir}(t)$  refer to the amount of output of  
 2380 sector  $i$  in region  $r$  allocated to reconstruct the damaged capital of sector  $j$  in region  $s$  and  
 2381 of the residential sector in region  $h$  respectively.  $HOD_{kh}^{ir}(t-1)$  refers to the orders issued by the  
 2382  $k$ th type of final users in region  $h$  to its suppliers of sector  $i$  in region  $r$  at time  $t-1$ .  
 2383  $ROD_{js}^{ir}(t-1)$  and  $ROD_{res,h}^{ir}(t-1)$  are the orders issued to support the reconstruction of damaged  
 2384 capital of sector  $j$  in region  $s$  and of the residential sector in region  $h$ , respectively. These  
 2385 demands are calculated in the demand module.

2386 Therefore, the recovered capital of sector  $j$  in region  $s$  and the residential sector in region  $h$  at the  
 2387 end of period  $t$  are equal to:

2388 
$$K_{js}^{REC}(t) = \sum_i \sum_r RRC_{js}^{ir}(t), \quad (29)$$

2389 and 
$$K_{res,h}^{REC}(t) = \sum_i \sum_r RRC_{res,h}^{ir}(t). \quad (30)$$

2390 And the restoration of inventories  $S_{js}^{i,restored}(t)$  and the dynamics of inventories  $S_{js}^i(t)$  at the end of  
 2391 each time step are calculated by Equations (17) and (18).

2392 In the **demand module**, downstream clients issue orders to their suppliers according to their production,  
 2393 consumption, and reconstruction plans for the next period at the end of each time step. Unlike Indicator  
 2394 4.1.2 where the demand redistribution is only based on the production capacity of suppliers, here the  
 2395 transportation capacity restricted by the COVID control (i.e., reduced by a percentage of  $\gamma_r^C(t)$  in the  
 2396 epidemic region  $r$ ) is also included. In other words, we assume that the economic agents redistribute  
 2397 their orders for a specific product among suppliers from different regions based on both the transportation  
 2398 and production capacities. Then the orders for the product of sector  $i$  in region  $r$  issued by a specific  
 2399 type of clients  $p$  (e.g., downstream production sectors, various final users, and reconstruction sectors)  
 2400 at each time step is calculated as below:

2401 
$$POD_p^{ir}(t) = POD_p^{i,*}(t) \times \frac{\overline{POD}_p^{ir} \times (1 - \gamma_r^C(t)) \times x_{ir}^a(t)}{\sum_r \overline{POD}_p^{ir} \times (1 - \gamma_r^C(t)) \times x_{ir}^a(t)}. \quad (31)$$

2402 Here  $POD_p^{i,*}(t)$  is the target level of demand from client  $p$  for product  $i$  at time  $t$ .  $\overline{POD}_p^{ir}$  is the  
 2403 pre-disaster level of demand from client  $p$  for product  $i$  in region  $r$ .  $x_{ir}^a(t)$  is the actual  
 2404 production of sector  $i$  in region  $r$  at time  $t$ , which is defined by both the maximum production  
 2405 capacity and the total demand in the previous period (same as Equation (3) in Indicator 4.1.2).

2406 For business clients, say a downstream production sector  $j$  in region  $s$ ,  $POD_p^{jr}(t)$  and  $\overline{POD}_p^{jr}$   
 2407 become  $FOD_{js}^{jr}(t)$  and  $\overline{FOD}_{js}^{jr}$  and the targeted demand for product  $i$  is equal to the gap between  
 2408 the targeted and the actual inventory levels of that product, i.e.,  $S_{js}^{i,G}(t) - S_{js}^i(t)$ , which have been  
 2409 described by Equations (11) and (12) in Indicator 4.1.2.

2410 For final clients, say the  $k$ th type of final users (i.e., domestic households, governments, investors, or  
 2411 foreign consumers) in region  $h$ ,  $POD_p^{kr}(t)$  and  $\overline{POD}_p^{kr}$  become  $HOD_{kh}^{kr}(t)$  and  $\overline{HOD}_{kh}^{kr}$ , and the  
 2412 targeted demand for product  $i$  is equal to the sum of final demand from different regions at the pre-  
 2413 disaster levels, i.e.,  $\sum_r \overline{HOD}_{kh}^{ir}$ , which have been described by Equations (13) and (14). We also assume  
 2414 that the demands for restaurants, hotels, tourism and other outdoor entertainment services will decline in  
 2415 the flooded and epidemic regions following a similar principle as Guan, Wang<sup>103</sup>.

2416 For reconstruction clients, including both the production sector  $j$  in region  $s$  and the residential  
 2417 sector in region  $h$ , we assume that they set their targeted level of capital stock at the pre-disaster level  
 2418  $\bar{K}_{js}$  and  $\bar{K}_{res,h}$ , respectively. We use the capital matrix coefficients,  $d_s^{ir}$ , to express the quantities of  
 2419 product  $i$  in region  $r$  that are invested to formulate one unit of capital in region  $s$ . We assume that  
 2420 different sectors in the same region share the same capital matrix coefficients. Therefore, the targeted

2421 demand for product  $i$  to support reconstruction of sector  $j$  in region  $s$  and the residential sector in  
 2422 region  $h$  at time step  $t$ ,  $ROD_{js}^{i,*}(t)$  and  $ROD_{res,h}^{i,*}(t)$ , are calculated as below:

$$2423 \quad ROD_{js}^{i,*}(t) = \sum_r (\bar{K}_{js} - K_{js}(t)) \times d_s^{ir}, \quad (32)$$

$$2424 \quad \text{and} \quad ROD_{res,h}^{i,*}(t) = \sum_r (\bar{K}_{res,h} - K_{res,h}(t)) \times d_h^{ir}. \quad (33)$$

2425 Here  $K_{js}(t)$  and  $K_{res,h}(t)$  are the capital stock held by sector  $j$  in region  $s$  and the residential  
 2426 sector in region  $h$  at time  $t$ , respectively, which are derived from Equations (21) and (22).

2427 Then the orders issued by the reconstruction activities of sector  $j$  in region  $s$  and the residential  
 2428 sector in region  $h$  to the suppliers of product  $i$  in region  $r$  are as below:

$$2429 \quad ROD_{js}^{ir}(t) = ROD_{js}^{i,*}(t) \times \frac{d_s^{ir} \times (1 - \gamma_r^C(t)) \times x_{ir}^a(t)}{\sum_r d_s^{ir} \times (1 - \gamma_r^C(t)) \times x_{ir}^a(t)}, \quad (34)$$

$$2430 \quad \text{and} \quad ROD_{res,h}^{ir}(t) = ROD_{res,h}^{i,*}(t) \times \frac{d_h^{ir} \times (1 - \gamma_r^C(t)) \times x_{ir}^a(t)}{\sum_r d_h^{ir} \times (1 - \gamma_r^C(t)) \times x_{ir}^a(t)}. \quad (35)$$

2431 Finally, the total orders received by sector  $i$  in region  $r$  are:

$$2432 \quad TD_{ir}(t) = \sum_s \sum_j FOD_{js}^{ir}(t) + \sum_k \sum_h HOD_{kh}^{ir}(t) + \sum_s \sum_j ROD_{js}^{ir}(t) + \sum_h ROD_{res,h}^{ir}(t). \quad (36)$$

2433 At each time step, the economic agents on the supply and demand sides go through the above production,  
 2434 allocation and recovery and demand adjustment procedures. This discrete-time dynamic procedure can  
 2435 reproduce the economic equilibrium and simulate the propagation of exogenous shocks in the economic  
 2436 network. The direct cost of each sector due to the compound event  $DC_{ir}$  is defined as the capital  
 2437 damage in that sector caused by the flood, and the indirect cost  $IC_{ir}$  is the value-added loss of that  
 2438 sector caused by both the flood and epidemic control during the entire economic recovery, given by:

$$2439 \quad DC_{ir} = \sum_t (K_{ir}^D(t) + K_{res,r}^D(t)), \quad (37)$$

$$2440 \quad \text{and} \quad IC_{ir} = \sum_t (\bar{va}_{ir} - va_{ir}(t)). \quad (38)$$

2441 Here  $va_{ir}(t)$  and  $\bar{va}_{ir}$  is the value-added of sector  $i$  in region  $r$  at time  $t$  and at the pre-disaster  
 2442 level, respectively, as defined in Equation (16) in Indicator 4.1.2.

## 2443 Data

2444 1. Data on physical or direct damage of the climate-related extreme events between 2017-2019 is  
 2445 sourced from the China Statistical Yearbooks on Environment<sup>104</sup> and that between 2020-2021 is  
 2446 from the reports of Ministry of Emergency Management of China<sup>105,106</sup>. We have excluded the



2447 damage caused by earthquakes from the total damage of natural disasters, and the climate-related  
 2448 disasters in this report refer to droughts, floods, hailstorms and thunderstorms, cyclones, blizzards  
 2449 and extreme low temperatures. Data processing are in the same way as the 2021 report. The direct  
 2450 damage due to climate-related extreme events is first broken down into three industrial sectors (i.e.,  
 2451 primary, secondary and tertiary industries) and a residential sector, according to the proportions  
 2452 based on empirical evidence of China’s historical events between 1961-1990 sourced by Yin, Hu  
 2453 <sup>107</sup>, and damages of the three industrial sectors are further disaggregated into the 20 production sub-  
 2454 sectors (see Table 32 in Indicator 4.1.2) in proportion to their value added of the relevant years.

2455 2. Disaster data on Zhengzhou floods is collected by the “Flood Disaster Action Group” in Zhengzhou  
 2456 University<sup>108</sup>.

2457 3. The IO tables used for this indicator are from the same sources and processed in the same way as  
 2458 Indicator 4.1.2.

2459 4. China’s GDPs and currency exchange rates of the relevant years are obtained from China Statistical  
 2460 Yearbook 2021<sup>85</sup> and China’s 2021 Statistical Bulletin on National Economics and Social  
 2461 Development<sup>100</sup>. Regional GDPs in Henan province and its capital city Zhengzhou in 2021 are  
 2462 collected from local bureaus of statistics<sup>109,110</sup>.

2463 **Caveats**

2464 The model does not consider productivity losses of labours, another key productive factor, resulting  
 2465 from climate-related extreme events, as such data is not available at present. However, empirical  
 2466 evidence shows that compared to the percentage losses of capital, the relative losses of labour are  
 2467 usually much lower, so that they have little effect on the modelling results.

2468 We do not consider the health costs caused by the coronavirus outbreak during the Zhengzhou’s  
 2469 compound event, as we mainly focus on its economic impacts and the propagation effects through  
 2470 the production supply chain.

2471 **Future Form of Indicator**

2472 This indicator will be developed to provide more updated loss information on the provincial scale.

2473 **Additional Information**

2474 **Table 37: China’s economic losses from climate-related extreme events by sector and year. The**  
 2475 **direct and indirect costs are given in billions of US\$ at 2020 prices, and the relative costs are**  
 2476 **given as percentages of China’s GDP.**

| Year | Direct losses    |                    |                   |                    | Indirect losses  |                    |                   | % GDP |
|------|------------------|--------------------|-------------------|--------------------|------------------|--------------------|-------------------|-------|
|      | Primary industry | Secondary industry | Tertiary industry | Residential sector | Primary industry | Secondary industry | Tertiary industry |       |
| 2017 | 2.9              | 8.3                | 8.2               | 25.4               | 7.6              | 2.5                | 2.9               | 0.44% |
| 2018 | 2.6              | 7.5                | 7.5               | 23.1               | 6.0              | 1.4                | 2.5               | 0.35% |
| 2019 | 3.0              | 8.6                | 8.6               | 26.5               | 6.9              | 1.6                | 2.9               | 0.40% |
| 2020 | 3.4              | 9.9                | 9.8               | 30.3               | 7.9              | 1.8                | 3.3               | 0.45% |
| 2021 | 3.1              | 8.9                | 8.8               | 27.3               | 7.1              | 1.6                | 3.0               | 0.35% |

2477

2478 **Table 38: China's economic losses at the provincial level, in percent of regional GDP, from**  
 2479 **climate-related extreme events in 2019.**

| Provinces      | Direct costs | Indirect costs | Total costs |
|----------------|--------------|----------------|-------------|
| Beijing        | 0.02%        | 0.01%          | 0.03%       |
| Tianjin        | 0.00%        | -0.04%         | -0.04%      |
| Hebei          | 0.06%        | -0.03%         | 0.03%       |
| Shanxi         | 0.65%        | 0.07%          | 0.72%       |
| Inner Mongolia | 0.25%        | 0.02%          | 0.28%       |
| Liaoning       | 0.17%        | -0.01%         | 0.17%       |
| Jilin          | 0.30%        | 0.03%          | 0.33%       |
| Heilongjiang   | 1.15%        | 0.89%          | 2.04%       |
| Shanghai       | 0.01%        | -0.05%         | -0.04%      |
| Jiangsu        | 0.02%        | -0.03%         | -0.02%      |
| Zhejiang       | 0.94%        | 0.25%          | 1.19%       |
| Anhui          | 0.25%        | 0.23%          | 0.48%       |
| Fujian         | 0.32%        | 0.62%          | 0.94%       |
| Jiangxi        | 1.42%        | 1.19%          | 2.61%       |
| Shandong       | 0.51%        | 0.11%          | 0.62%       |
| Henan          | 0.08%        | 0.09%          | 0.17%       |
| Hubei          | 0.25%        | 0.08%          | 0.32%       |
| Hunan          | 0.62%        | 0.33%          | 0.95%       |
| Guangdong      | 0.05%        | 0.06%          | 0.11%       |
| Guangxi        | 0.45%        | 0.22%          | 0.67%       |
| Hainan         | 0.03%        | -0.11%         | -0.08%      |
| Chongqing      | 0.09%        | -0.02%         | 0.07%       |
| Sichuan        | 0.64%        | 0.18%          | 0.82%       |
| Guizhou        | 0.29%        | 0.03%          | 0.32%       |
| Yunnan         | 0.52%        | 0.11%          | 0.63%       |
| Tibet          | 0.11%        | 0.04%          | 0.15%       |
| Shaanxi        | 0.23%        | -0.02%         | 0.21%       |
| Gansu          | 0.33%        | 0.13%          | 0.46%       |
| Qinghai        | 0.24%        | -0.23%         | 0.00%       |
| Ningxia        | 0.07%        | 0.03%          | 0.10%       |
| Xinjiang       | 0.30%        | 0.51%          | 0.81%       |
| Macao          | Null         | Null           | Null        |
| Hong Kong      | Null         | Null           | Null        |
| Taiwan         | Null         | Null           | Null        |
| Total          | 0.32%        | 0.15%          | 0.47%       |

2480

2481 **Table 39: Economic losses of Zhengzhou's compound event (in billions of 2020 US\$).**

| Regions | Direct losses | Indirect losses |                  | Total losses | % of local GDP |
|---------|---------------|-----------------|------------------|--------------|----------------|
|         |               | Flood-related   | Epidemic-related |              |                |

|                          |     |     |     |      |       |
|--------------------------|-----|-----|-----|------|-------|
| Zhengzhou                | 9.9 | 3.6 | 3.0 | 16.5 | 8.74% |
| Henan (except Zhengzhou) | -   | 1.1 | 0.7 | 1.8  | 0.26% |
| China (except Henan)     | -   | 0.8 | 0.5 | 1.3  | 0.01% |
| Sum                      | 9.9 | 5.5 | 4.2 | 19.6 | 0.12% |

2482 During the compound event of Zhengzhou's extreme rainfalls and COVID epidemic, the local lockdown  
 2483 to control the epidemic has increased the indirect losses by 77% and the indirect/direct loss ratio from  
 2484 0.55 to 0.98. Zhengzhou's non-metallic mineral sector is also a critical sector with strong propagation  
 2485 effects. The reduction in its production has triggered US\$1.6 billion of losses, which nearly doubled its  
 2486 value-added loss, in trades with other sectors and regions.

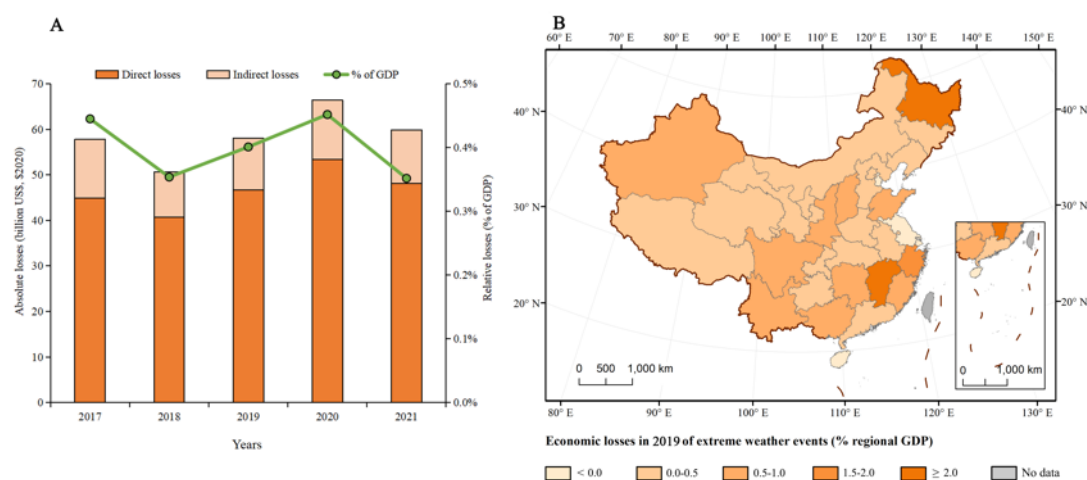

2487

2488 **Figure 44: Economic losses due to climate-related extreme events.**

2489 **(A) National-level results, by year, in billions of 2020 US\$; (B) Provincial-level results in 2019,**  
 2490 **relative to provincial GDPs.**

2491 **Note: Negative values indicate economic gains from the stimulus effects of post-disaster**  
 2492 **reconstruction and inter-provincial substitution.**

2493

2494 **Indicator 4.2: The economics of the transition to zero-carbon economies**

2495 **Indicator 4.2.1: Investment in new coal and low-carbon energy**

2496 **Methods**

2497 In this indicator 4.2.1, the methodology this year has followed the same methodology in previous year,  
 2498 and investment data was updated to the current 2021. Investment in each year indicate that new power  
 2499 generation facility is assigned to the year in which the power plant became operational. The main data is  
 2500 from the Wind Economic database<sup>111</sup>. Wind is a comprehensive and paid database which massively  
 2501 combines macro and sectoral data. It is commonly used for financial and macro analysis. Four categories  
 2502 of energy investment (Thermal, nuclear, hydro, and wind) are from Wind Economic database. Investment  
 2503 of Solar PV has been derived from new power generation facilities (Wind Economic database) and unit

2504 investment. Investment of Biomass is from National Energy Administration<sup>112</sup>. Six categories of energy  
2505 investment are defined:

2506 • Thermal power – investment in fixed capital information and constructing power generation facilities  
2507 of coal-, gas-, and oil-fired electricity.

2508 • Nuclear – investment in fixed capital information and constructing power generation facilities of nuclear  
2509 electricity.

2510 • Hydro power – investment in fixed capital information and constructing power generation facilities of  
2511 hydroelectricity.

2512 • Wind power – investment in fixed capital information and constructing power generation facilities of  
2513 wind electricity.

2514 • Solar PV – investment in fixed capital information and constructing power generation facilities of solar  
2515 electricity.

2516 • Biomass – investment in fixed capital information and constructing power generation facilities of  
2517 biomass electricity.

2518 • Grid – investment in fixed capital information of constructing overall power grid.

2519 In 2021 report, we also updated data of new power capacity facilities in national and provincial level for  
2520 thermal, nuclear, hydro, wind and solar PV from Wind Economic database. Due to unavailable public  
2521 access of provincial investment. Thus, to analyze provincial investment of low-carbon energy, we  
2522 process the national-level new investment of power generation (Table 40) and new capacity of power  
2523 generation facilities (Table 41) to derive unit investment of each energy types from 2008 to 2021, and  
2524 then we further calculated to have provincial investment data on new power generation facility (Table  
2525 42).

#### 2526 **Data**

2527 1. New investment of power generation facility data in national-level, listed by wind, hydro, nuclear,  
2528 thermal and overall power grid, is taken from the Wind Economic database<sup>111</sup>.

2529 2. New capacity of power generation facilities data in national and provincial-level, listed by thermal,  
2530 nuclear, hydro, wind and solar PV, is taken from Wind Economic database<sup>111</sup>.

2531 3. Biomass data is taken from the National Energy Administration<sup>112</sup>.

2532 4. Currency exchange rate is based on 2021 RMB ¥ to 2021 US\$, the value is further adjusted to CPI  
2533 2020=1 according to National Bureau of Statistics of China<sup>113</sup>.

#### 2534 **Caveats**

2535 Low-carbon energy investment here mainly includes centralized project but excludes investment in  
2536 decentralized facilities. For biomass new investment, complete provincial-level data in 2021 is not  
2537 available, only a few provinces have data from government official sources.

2538 **Future Form of Indicator**

2539 Future indicator may consider provincial-level grid investment. The regional grid capacity shall well-  
2540 collaborate with low-carbon power generation facilities.

2541 **Additional Information**

2542 **Table 40: New investment in power generation facilities from 2008 to 2021 (US\$ billion, CPI**  
2543 **2020=1)**

|      | <b>Biomass</b> | <b>Nuclear</b> | <b>Hydro</b> | <b>Wind</b> | <b>Solar</b> | <b>Thermal</b> | <b>Total</b> |
|------|----------------|----------------|--------------|-------------|--------------|----------------|--------------|
| 2008 |                | 5.112          | 13.171       | 8.181       |              | 26.044         | 52.508       |
| 2009 |                | 9.664          | 14.35        | 12.936      | 0.032        | 25.542         | 62.524       |
| 2010 |                | 10.301         | 13.03        | 16.504      | 0.218        | 22.685         | 62.738       |
| 2011 |                | 11.91          | 15.13        | 14.069      | 2.139        | 17.668         | 60.916       |
| 2012 | 12.075         | 12.564         | 19.839       | 9.727       | 1.203        | 16.055         | 71.464       |
| 2013 | 15.375         | 9.753          | 19.955       | 10.104      | 12.673       | 14.862         | 82.721       |
| 2014 | 16.222         | 8.582          | 15.184       | 14.748      | 9.304        | 18.444         | 82.484       |
| 2015 | 18.619         | 9.156          | 12.785       | 19.446      | 14.538       | 18.846         | 93.39        |
| 2016 | 19.186         | 8.12           | 9.942        | 14.928      | 39.006       | 18.031         | 109.213      |
| 2017 | 21.477         | 7.342          | 10.059       | 11.014      | 60.426       | 13.876         | 124.195      |
| 2018 | 21.517         | 7.033          | 10.847       | 10.332      | 35.993       | 12.505         | 98.227       |
| 2019 | 23.985         | 7.793          | 14.451       | 24.512      | 19.057       | 12.136         | 101.933      |
| 2020 | 26.114         | 6.06           | 17.265       | 41.969      | 27.044       | 8.865          | 127.316      |
| 2021 | 38.512         | 8.548          | 15.697       | 31.49       | 28.8         | 10.677         | 133.723      |

2544

2545 **Table 41: New power generation facilities from 2008 to 2021**

|      | <b>Biomass</b> | <b>Nuclear</b> | <b>Hydro</b> | <b>Wind</b> | <b>Solar</b> | <b>Thermal</b> | <b>Total</b> |
|------|----------------|----------------|--------------|-------------|--------------|----------------|--------------|
| 2008 |                |                | 21.483       | 4.991       |              | 65.545         | 92.019       |
| 2009 |                |                | 21.057       | 9.73        | 0.028        | 65.858         | 96.672       |
| 2010 |                | 1.737          | 16.428       | 14.573      | 0.196        | 58.306         | 91.24        |
| 2011 |                | 1.747          | 12.828       | 15.278      | 1.96         | 62.413         | 94.226       |
| 2012 | 0.5            | 0.66           | 16.76        | 12.96       | 1.073        | 52.36          | 84.313       |
| 2013 | 4.35           | 2.208          | 29.93        | 14.064      | 11.305       | 36.5           | 98.357       |
| 2014 | 0.9            | 5.472          | 21.797       | 21.006      | 8.251        | 47.906         | 105.332      |
| 2015 | 0.91           | 7.241          | 16.076       | 29.609      | 12.817       | 63.997         | 130.649      |
| 2016 | 1.83           | 7.2            | 11.74        | 18.73       | 34.59        | 48.36          | 122.45       |
| 2017 | 2.74           | 2.175          | 12.875       | 19.517      | 53.375       | 45.778         | 136.46       |
| 2018 | 3.05           | 8.84           | 8.54         | 21          | 44.73        | 41.19          | 127.35       |
| 2019 | 4.73           | 4.09           | 4.45         | 25.72       | 26.52        | 44.23          | 109.74       |
| 2020 | 5.43           | 1.12           | 13.13        | 72.11       | 48.2         | 56.6           | 196.59       |
| 2021 | 8.08           | 3.4            | 23.49        | 47.57       | 54.93        | 46.28          | 183.75       |

2546

2547 **Table 42: Provincial level data of investment in power sector construction in 2020. (US\$ billion)**

|  | <b>Low-carbon</b> | <b>Thermal</b> |
|--|-------------------|----------------|
|--|-------------------|----------------|

---

|               |       |       |
|---------------|-------|-------|
| Beijing       | 0.133 | 0.002 |
| Tianjin       | 0.378 | 0.152 |
| Hebei         | 6.022 | 0.348 |
| Shanxi        | 1.723 | 1.497 |
| InnerMongolia | 2.348 | 0.803 |
| Liaoning      | 0.743 | 0.247 |
| Jilin         | 1.663 | 0.035 |
| Heilongjiang  | 1.721 | 0.311 |
| Shanghai      | 0.333 | 0.138 |
| Jiangsu       | 5.771 | 0.75  |
| Zhejiang      | 4.008 | 0.364 |
| Anhui         | 2.656 | 0.171 |
| Fujian        | 2.495 | 0.328 |
| Jiangxi       | 1.073 | 0.602 |
| Shandong      | 6.996 | 0.791 |
| Henan         | 4.196 | 0.611 |
| Hubei         | 2.887 | 0.143 |
| Hunan         | 1.242 | 0.551 |
| Guangdong     | 5.823 | 1.158 |
| Guangxi       | 1.21  | 0.302 |
| Hainan        | 0.143 | 0.134 |
| Chongqing     | 0.561 | 0.039 |
| Sichuan       | 7.484 | 0.544 |
| Guizhou       | 0.976 | 0.03  |
| Yunnan        | 3.504 | 0.035 |
| Shaanxi       | 2.154 | 0.03  |
| Gansu         | 3.283 | 0.016 |
| Qinghai       | 0.683 | 0.001 |
| Ningxia       | 1.496 | 0.023 |
| Xinjiang      | 1.735 | 0.526 |
| Tibet         | 0.564 |       |

---

2548

2549

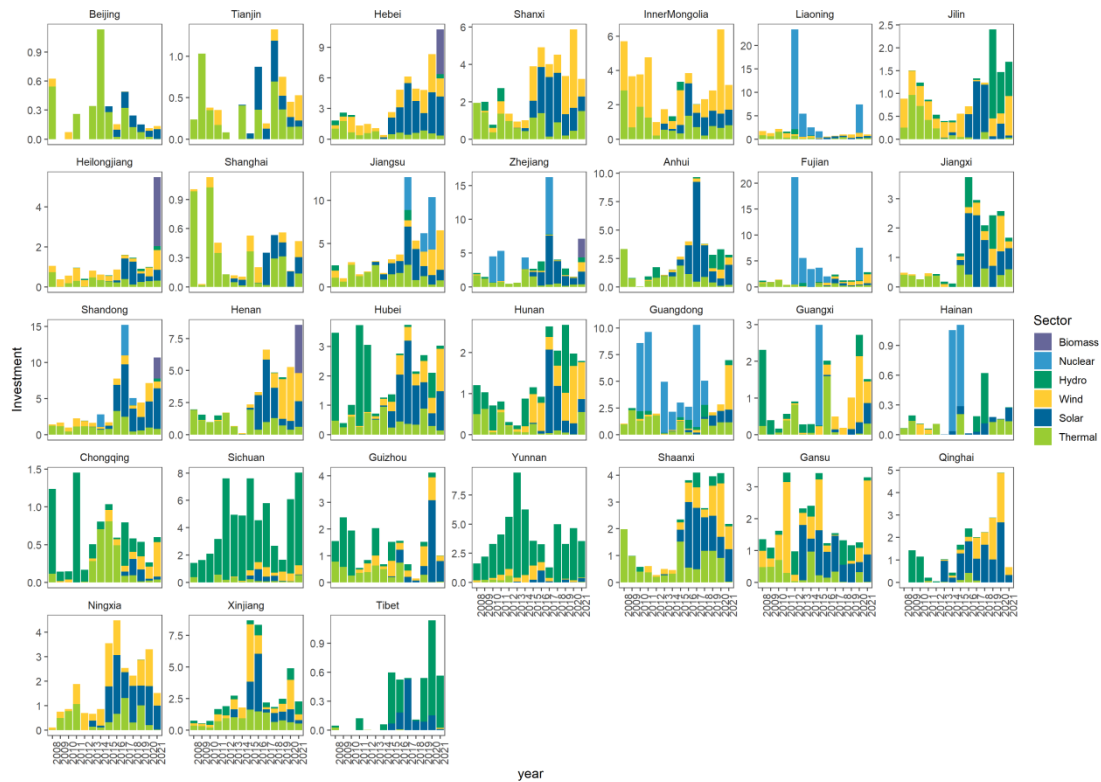

2550

2551

**Figure 45: Investment in new power generation in China (US\$ Billion).**

2552

2553

**Indicator 4.2.2: Employment in low-carbon and high-carbon industries**

2554

**Methods**

2555

This indicator presents China’s direct employment in fossil fuel extraction industries, including coal mining, oil and gas exploration and extraction, as well as direct and indirect employment in renewable energy. The methodology for this indicator remains the same as in the 2021 China Lancet Countdown report.

2556

2557

2558

2559

The data for this indicator is sourced from IRENA Renewable Energy and Jobs Annual Review 2021<sup>114</sup> (renewables) and CEIC Data (2012-2020)<sup>115</sup> (fossil fuel extraction), National Bureau of Statistics of China<sup>111</sup>.

2560

2561

2562

Renewable industries included are:

2563

- Solar energy;

2564

- Wind energy;

2565

- Bioenergy;

2566

- Hydropower;

2567

- Other technologies.

2568 Bioenergy includes liquid biofuels, soil biomass and biogas. Solar energy includes solar heating/cooling;  
2569 solar photovoltaic and concentrated solar power, ‘Other technologies’ includes geothermal energy,  
2570 ground-based heat pumps, municipal and industrial waste, and ocean energy. Fossil fuel extraction  
2571 includes coal mining, oil and gas exploration and production. Fossil fuel extraction values include direct  
2572 employment, whereas renewable energy jobs include direct and indirect employment (e.g., equipment  
2573 manufacturing), except for large hydropower (direct employment only).

2574 Due to an improvement in data collection and estimation methodology, employment values reported for  
2575 other technologies are unavailable in some years.

#### 2576 **Data**

2577 1. Data on renewable energy employment is sourced from IRENA Renewable Energy and Jobs Annual  
2578 Review 2021. <sup>114</sup>

2579 2. Data on employment in fossil fuel extraction is from CEIC Data (2012-2020) <sup>115</sup>, National Bureau  
2580 of Statistics of China. <sup>111</sup>

#### 2581 **Caveats**

2582 The caveats of this indicator can be described in three aspects. Provincial level data is not available for  
2583 most recent years and employment in low-carbon industries data is only available from 2012. Both direct  
2584 and indirect employment in renewable industries is counted, whereas only direct employment in fossil  
2585 fuel extraction is considered for employment in fossil fuel industries.

#### 2586 **Future Form of Indicator**

2587 An ideal future form of this indicator would track both direct and indirect employment from the  
2588 renewables and fossil fuel extraction industries, along with the provincial level distribution in their  
2589 change over time.



2590 **Additional Information**

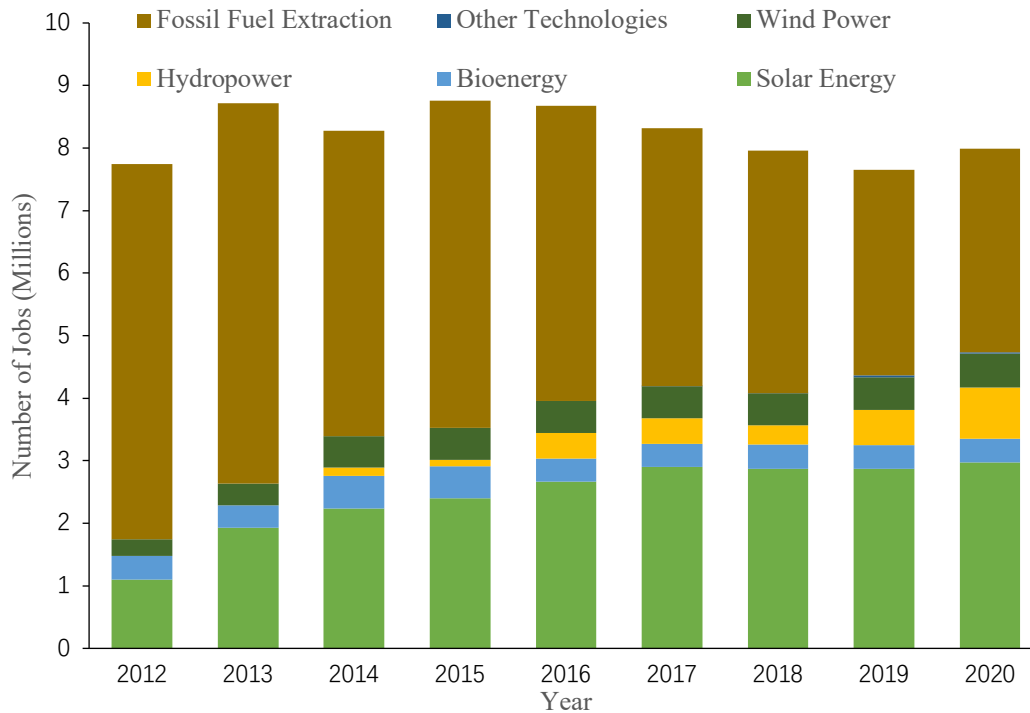

2591

2592 **Figure 46: Employment in renewable energy and fossil-fuel extraction sectors**

2593

2594 **Table 43: China employment in renewable energy and fossil-fuel extraction sectors (Million Jobs)**

|                        | 2012  | 2013  | 2014  | 2015  | 2016  | 2017  | 2018  | 2019  | 2020  |
|------------------------|-------|-------|-------|-------|-------|-------|-------|-------|-------|
| Solar Energy           | 1.1   | 1.93  | 2.241 | 2.395 | 2.663 | 2.897 | 2.875 | 2.87  | 2.97  |
| Bioenergy              | 0.38  | 0.354 | 0.521 | 0.521 | 0.376 | 0.376 | 0.382 | 0.384 | 0.384 |
| Hydropower             | 0     | 0     | 0.126 | 0.1   | 0.407 | 0.407 | 0.308 | 0.561 | 0.814 |
| Wind Power             | 0.267 | 0.356 | 0.502 | 0.507 | 0.509 | 0.51  | 0.51  | 0.518 | 0.55  |
| Other Technologies     | 0     | 0     | 0     | 0     | 0     | 0.002 | 0.003 | 0.028 | 0.014 |
| Fossil Fuel Extraction | 5.996 | 6.072 | 4.884 | 5.238 | 4.72  | 4.13  | 3.881 | 3.294 | 3.257 |

2595

2596 **Indicator 4.2.3: Net value of fossil fuel subsidies and carbon prices**

2597 **Methods**

2598 The methodology for this indicator is the same as described in the 2021 global and China Lancet  
 2599 Countdown report appendix.<sup>11,19</sup> The data for fossil fuel consumption subsidies is taken from the IEA<sup>116</sup>,  
 2600 which is calculated based on the price-gap approach. As the most commonly applied methodology for  
 2601 quantifying consumption subsidies, the price-gap approach compares average end-user price paid by  
 2602 consumers with reference prices that reflect full cost of supply. Therefore, the price gap equals to the  
 2603 amount by which an end-use price falls short of the reference price, indicating the presence of a subsidy.  
 2604 Prices are presented in real 2020 US\$. Original data and a detailed description of the calculation

2605 methodology can be obtained from the IEA (2022).<sup>116</sup> The data for carbon price of eight carbon emission  
 2606 trading markets are taken from the Wind Economics Database 2021<sup>111</sup>. Carbon price of national and eight  
 2607 pilot emission trading markets has been updated to the latest 2021 data, and carbon price between 2013  
 2608 to 2021 has been converted to the 2020 constant price.

2609 **Data**

2610 1. IEA, Fossil Fuel Subsidies Database<sup>116</sup>

2611 2. Wind Economic Database<sup>111</sup>

2612 **Caveats**

2613 Coal consumption subsidies for all the years during 2010 to 2020, and gas consumption subsidies for  
 2614 some years are unavailable, due to the lack of consistent data. Moreover, values do not include the  
 2615 economic value of the unpriced negative externalities.

2616 National carbon price in China has started in 2021 July, available data is from July to December 2021.

2617 Data of carbon price and cumulative trading volume of eight pilot emission trading markets of Beijing,

2618 Shanghai, Shenzhen, Guangzhou, Tianjin, Hubei, Chongqing, and Fujian are from 2013 to 2021.

2619 **Future Form of Indicator**

2620 1. The consistent inclusion of production and consumption subsidies for all fuels, especially coal,  
 2621 available on an annual basis.

2622 2. More focus on national carbon price trend as more data will be available in the future.

2623 **Additional Information**

2624 Carbon price appeared in great variance in eight pilot carbon emissions trading market in China, from  
 2625 US\$ 9.53 per tCO<sub>2</sub> in Beijing, to US\$ 1.82 per tCO<sub>2</sub> in Shenzhen in 2021<sup>111</sup>; however, price differentials  
 2626 between the trading markets have narrowed in 2021 compared with 2020. Guangzhou still stayed on the  
 2627 top of the cumulative trading volumes, reaching 177,930 kton in 2021, which is around 10.84 times of  
 2628 the volumes of Beijing.

2629 **Table 44: Fossil fuel consumption subsidies in China, 2010-2020 (billion real 2020 US\$)**

| Year | Oil   | Electricity | Gas  | Coal | Total |
|------|-------|-------------|------|------|-------|
| 2010 | 12.78 | 32.06       | -    | -    | 44.84 |
| 2011 | 12.29 | 34.01       | 0.57 | -    | 46.87 |
| 2012 | 11.89 | 25.24       | 1.14 | -    | 38.27 |
| 2013 | 12.54 | 14.58       | 2.52 | -    | 29.65 |
| 2014 | 11.60 | 11.26       | 3.24 | -    | 26.10 |
| 2015 | 13.47 | 11.26       | -    | -    | 24.73 |
| 2016 | 15.71 | 32.86       | -    | -    | 48.57 |
| 2017 | 18.12 | 29.97       | -    | -    | 48.09 |
| 2018 | 16.75 | 32.27       | 1.46 | -    | 50.48 |
| 2019 | 18.84 | 15.17       | -    | -    | 34.01 |
| 2020 | 21.72 | 3.77        | -    | -    | 25.49 |

2630

**Table 45:** Average carbon price of eight carbon emission trading markets. (US\$/ton)

|           | 2013  | 2014 | 2015 | 2016 | 2017 | 2018 | 2019  | 2020  | 2021 |
|-----------|-------|------|------|------|------|------|-------|-------|------|
| Shenzhen  | 11.85 | 9.91 | 5.96 | 4.94 | 4.31 | 3.85 | 1.94  | 3.40  | 1.82 |
| Shanghai  | 4.74  | 5.86 | 3.76 | 1.57 | 5.01 | 5.41 | 5.89  | 5.80  | 6.40 |
| Beijing   | 8.34  | 8.89 | 7.58 | 7.29 | 7.47 | 8.38 | 11.46 | 12.63 | 9.53 |
| Guangdong | 9.71  | 8.21 | 3.01 | 1.84 | 2.03 | 2.14 | 3.19  | 3.95  | 6.11 |
| Tianjin   | 4.66  | 4.77 | 3.64 | 3.17 | 1.74 | 1.82 | 1.98  | 3.27  | 4.33 |
| Hubei     | 0.00  | 3.88 | 3.87 | 2.71 | 2.24 | 3.20 | 4.66  | 3.95  | 5.36 |
| Chongqing | 0.00  | 4.98 | 2.63 | 2.61 | 0.66 | 1.38 | 1.42  | 3.84  | 4.79 |
| Fujian    |       |      |      |      | 4.47 | 2.84 | 2.35  | 2.51  | 2.62 |

2631

2632

**Table 46:** Carbon emission cumulative trading volume (1000 ton)

|           | 2013    | 2014     | 2015          | 2016          | 2017          | 2018          | 2019           | 2020           | 2021          |
|-----------|---------|----------|---------------|---------------|---------------|---------------|----------------|----------------|---------------|
| Shenzhen  | 197.328 | 2013.709 | 6339.757      | 16983.64<br>2 | 22229.57<br>2 | 34887.03<br>4 | 43311.27<br>9  | 44550.47<br>4  | 50543.34      |
| Shanghai  | 23.27   | 1689.994 | 3166.102      | 7033.173      | 9401.501      | 12067.46<br>2 | 14704.68<br>4  | 16545.07<br>3  | 17925.11<br>7 |
| Beijing   | 2.6     | 1074.105 | 2328.691      | 4795.59       | 7233.141      | 10429.57<br>8 | 13499.39<br>7  | 14551.59<br>1  | 16417.41<br>7 |
| Guangdong | 120.129 | 1175.671 | 7932.191      | 30165.18<br>6 | 46738.57<br>4 | 73599.03<br>2 | 118982.6<br>13 | 151095.0<br>54 | 177930.4<br>9 |
| Tianjin   | 17.2    | 1028.54  | 2004.253      | 2372.049      | 3534.419      | 5409.624      | 6541.087       | 13715.65       | 18664.31<br>3 |
| Hubei     |         | 7001.171 | 20905.27<br>1 | 32628.06<br>4 | 45116.95<br>6 | 53724.44<br>6 | 59863.30<br>9  | 74141.42<br>5  | 79703.12      |
| Chongqing |         | 145      | 277.099       | 737.05        | 8173.653      | 8443.098      | 8495.188       | 8657.559       | 9808.114      |
| Fujian    |         |          |               |               | 2069.555      | 2934.769      | 4065.266       | 991.436        | 2217.05       |

2633

2634

2635

**Table 47:** National carbon price from July to December 2021 (US\$/ton).

|       | Jul  | Aug  | Sep  | Oct  | Nov  | Dec  |
|-------|------|------|------|------|------|------|
| China | 8.16 | 7.37 | 6.59 | 6.64 | 6.47 | 6.76 |

2636

2637

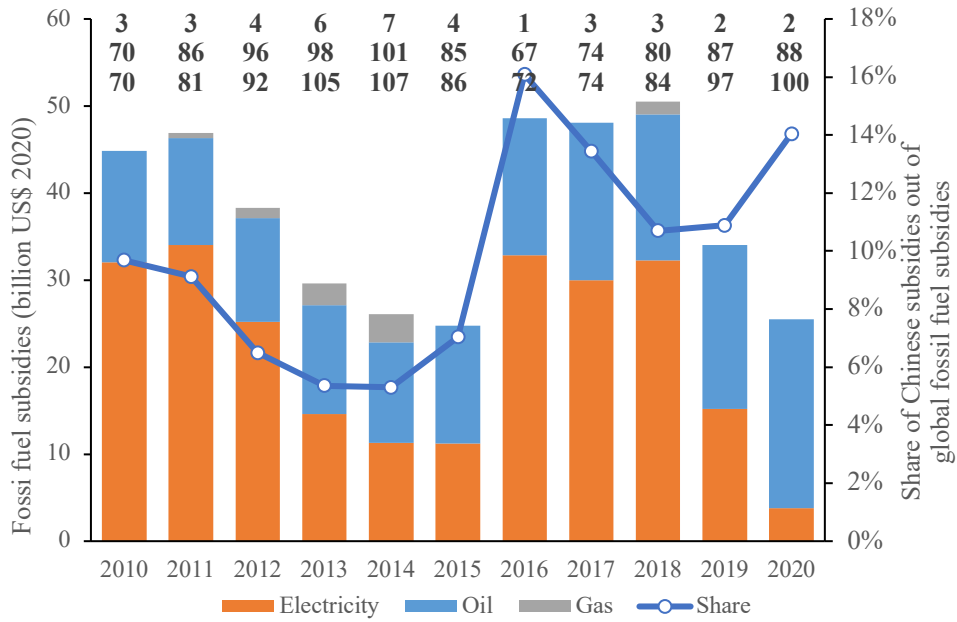

2638

2639 **Figure 47: Fossil fuel and electricity consumption subsidies in China, 2010-2020**

2640 **Note: The number on top of each bar represents the rank of fossil fuel subsidy of China in the**  
 2641 **world on the corresponding year, the global ranking of fossil fuel consumption subsidies per**  
 2642 **capita of China in the world on the corresponding year, and the global ranking of fossil fuel**  
 2643 **consumption subsidies per unit of GDP of China in the world on the corresponding year.**  
 2644

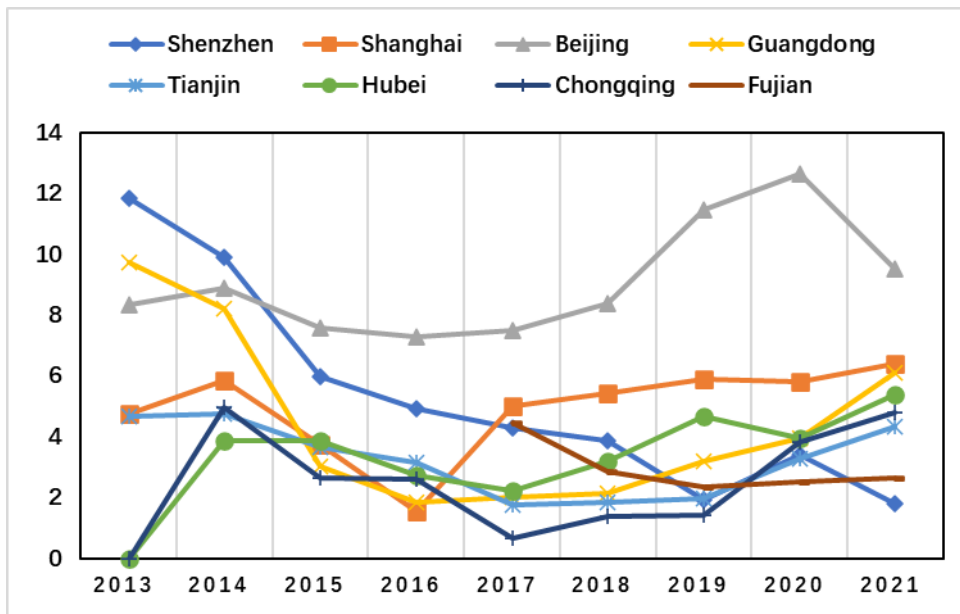

2645

2646 **Figure 48: Carbon price in eight pilot carbon emissions trading market in China.**

2647

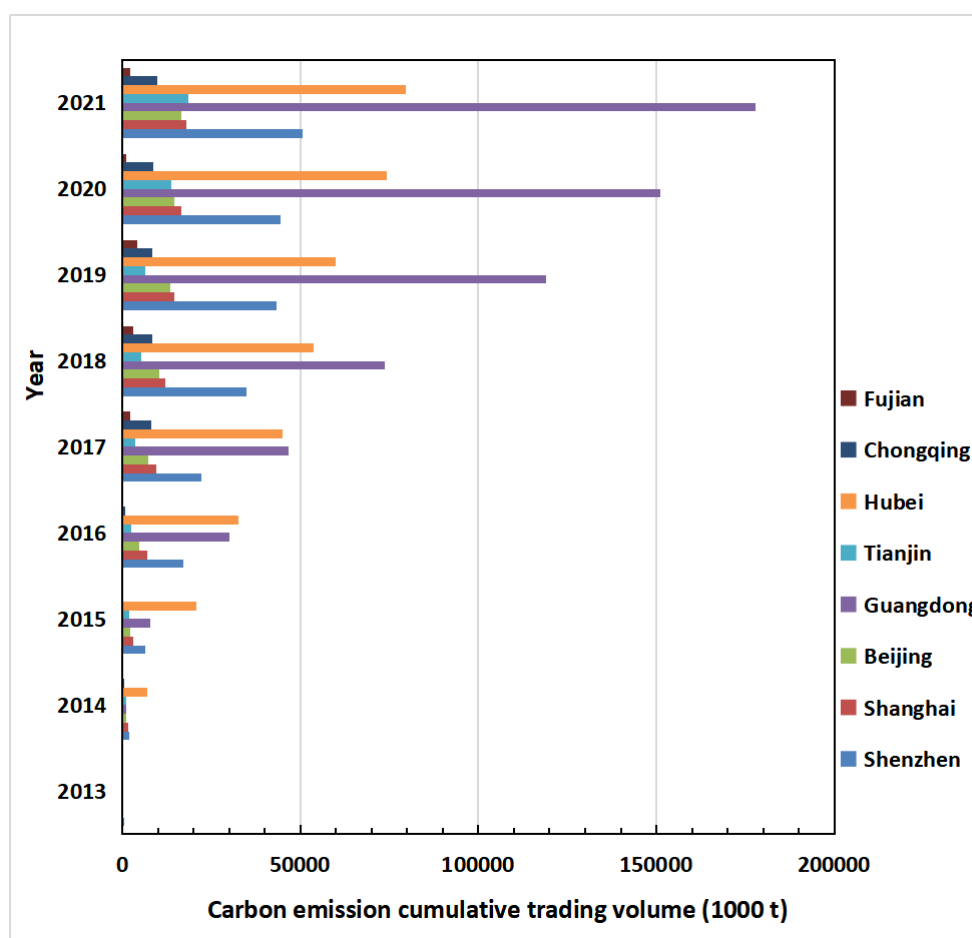

2648

2649

Figure 49: Carbon emission cumulative trading volume (1000t).

2650

2651

## Section 5: Public and political engagement

2652

Indicator 5.1: Media coverage of health and climate change

2653

Indicator 5.1.1: Social media

2654

2655

### Method

2656

Four steps to filter the posts, as shown below: Key words for the topics of (a) Climate Change, and (b) Health were identified as shown in Table 48.

2657

2658

2659

2660

Table 48 Chinese keywords for the search in Weibo

| 中文 Chinese |        | 英文 English                     |                        |
|------------|--------|--------------------------------|------------------------|
| 气候相关词汇     | 健康相关词汇 | Key words for "Climate Change" | Key words for "Health" |
| 气候变化       | 疟疾     | Climate change                 | Malaria                |
| 全球变暖       | 腹泻     | Global warming                 | Diarrhea               |
| 温室         | 感染     | Greenhouse                     | Infected               |
| 极端天气       | 肺炎     | Extreme weather                | Pneumonia              |
| 全球环境变化     | 流行病    | Global environment change      | Epidemic               |
| 低碳         | 公共卫生   | Low carbon                     | Public health          |
| 可再生能源      | 卫生     | Carbon dioxide emissions       | Hygiene                |
| 碳排放        | 发病     | Renewable energy               | Disease outbreak       |
| 二氧化碳排放     | 营养     | Carbon Production              | Nutrition              |

|        |        |                         |                      |
|--------|--------|-------------------------|----------------------|
| 气候污染   | 精神障碍   | Air pollution           | Mental disorders     |
| 气候     | 发育     | Climate                 | Growth               |
| 全球升温   | 传染     | Global warming          | Infection            |
| 再生能源   | 疾患     | Renewable energy        | Affection            |
| CO2 排放 | 症      | CO2 emissions           | Symptom              |
| 污染     | 瘟疫     | Pollution               | Epidemic             |
| 极端气候   | 流感     | Extreme weather         | Flu                  |
| 高温     | 流行感冒   | High temperature        | Influenza            |
| 变暖     | 治疗     | Warming                 | Treatment            |
| 排放     | 保健     | Emission                | Health care          |
| 环境变化   | 健康     | Environmental change    | Health               |
| 升温     | 死亡     | Warming                 | Death                |
| 全球温升   | 精神疾病   | Global warming          | Mental disease       |
| 热浪     | 精神病    | Heat wave               | Mental illness       |
| 暴雨     | 登革热    | Rainstorm               | Dengue               |
| 气温     | 饥饿     | Temperature             | Hunger               |
| 洪水     | 粮食     | Flood                   | Food                 |
| 洪灾     | 有害     | Flood                   | Harmful              |
| 气候反常   | 皮肤病    | Abnormal weather        | Skin disease         |
| 野火     | 风湿     | Wildfire                | Rheumatism           |
| 山火     | 呼吸系统疾病 | Mountain fire           | Respiratory diseases |
| 雪灾     | 人类健康   | Snowstorm               | Human health         |
| 低温     | 人体健康   | Low temperature         | Body health          |
| 年代际    | 身体健康   | Interdecadal            | Heart disease        |
| 冰雪     | 心脏病    | Ice and snow            | Diabetes             |
| 可持续发展  | 糖尿病    | Sustainable development | Illnesses            |
| 海洋酸化   | 疾病     | Ocean acidification     | Heat death           |
| 静稳     | 热死     | Stagnant                | Mask                 |
| 温室气体   | 口罩     | Greenhouse gas          | Protection           |
|        | 防护     |                         | Survive              |

2661  
2662  
2663  
2664  
2665  
2666  
2667  
2668  
2669  
2670  
2671

The detailed steps of the method used in 2021 is shown as below:

**Step 1: Crawling all the climate change posts from 2010 to 2021 on Weibo**

With a python-based crawler, all qualified posts published by seven Weibo accounts @People's Daily, @The Beijing News, @China Science Daily, @HealthTimes, @The Paper, @Xinhuanet, @China Meteorological News were collected from January, 2010 to December, 2021. 37 climate change related keywords were used, which is in accordance with the new climate change keywords used in the study of *Media coverage of health and climate change for People's Daily in China*<sup>117</sup>. The keywords are presented in the column of "Climate Change" in **Table 48**.

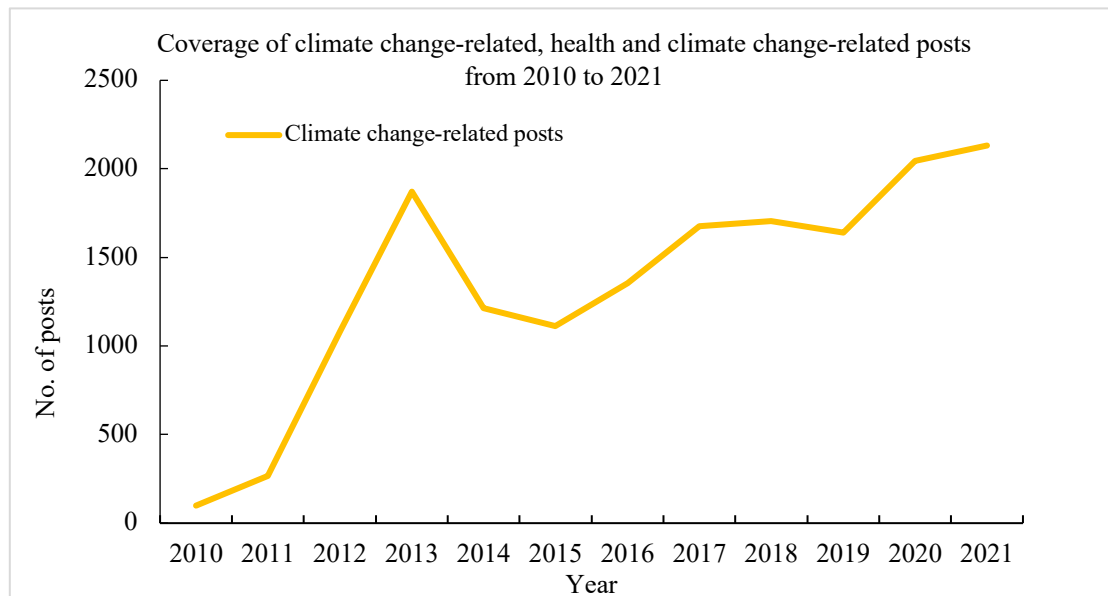

2672

2673 **Figure 50:** Coverage of climate change on Weibo between 2010 and 2021

2674

2675 **Step 2: Searching for health-related posts**

2676

2677 It was examined whether these posts show concern for public health by searching health-related  
2678 keywords, which is presented in the column of “Health” in **Table 48**. Our choice of health keyword list  
2679 followed previous research of Media coverage of health and climate change for People’s Daily in China  
2680 (Watts, et al., 2019)<sup>117</sup>. If a post contains at least 1 health-related word and word frequency ratio in the  
2681 whole post is greater than 0.01, this post is regarded as relevant to health topics. Manual screening is also  
2682 included in this step. The results are shown in **Figure 51**.

2683

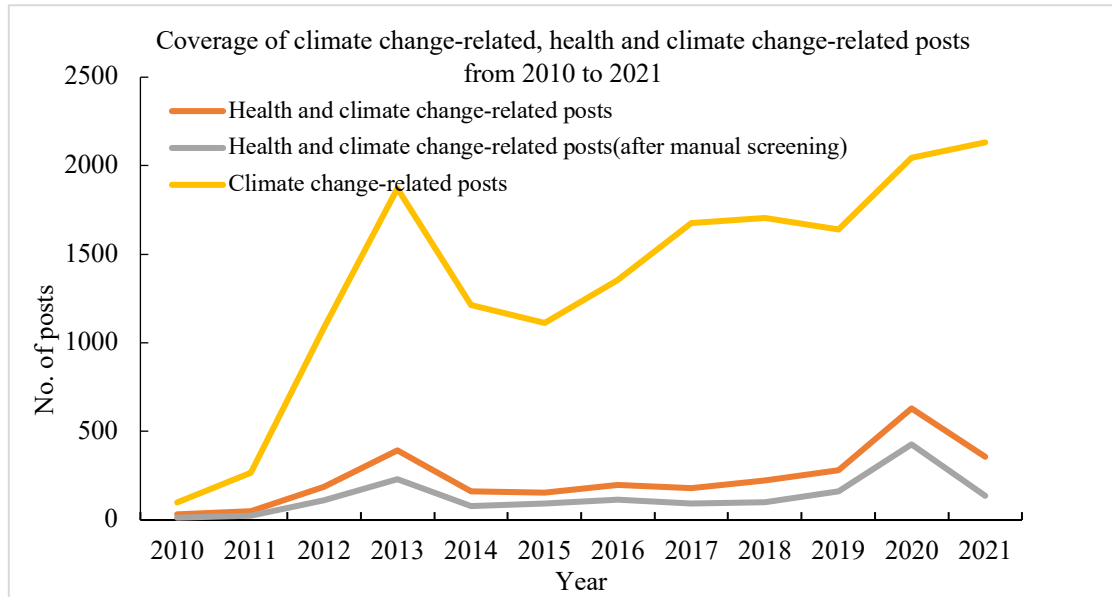

2684

2685 **Figure 51:** Coverage of climate change and health and climate change on Weibo between 2010 and 2021

2686

2687 **Step 3: Manual screening was added to test the positive rate**

2688

2689 We add manual screening process to test the data of health and climate change related posts and climate  
2690 change related posts. 138 was selected from a total number of 357 posts related to health only and 1733  
2691 was selected from a total number of 2132 posts concerning climate change by seven media (@People's  
2692 Daily, @The Beijing News, @China Science Daily, @Health Times, @The Paper, @Xinhuanet,

2693 @China Meteorological News) in 2021, with a false positive rate at 0.61 and 0.19 respectively.

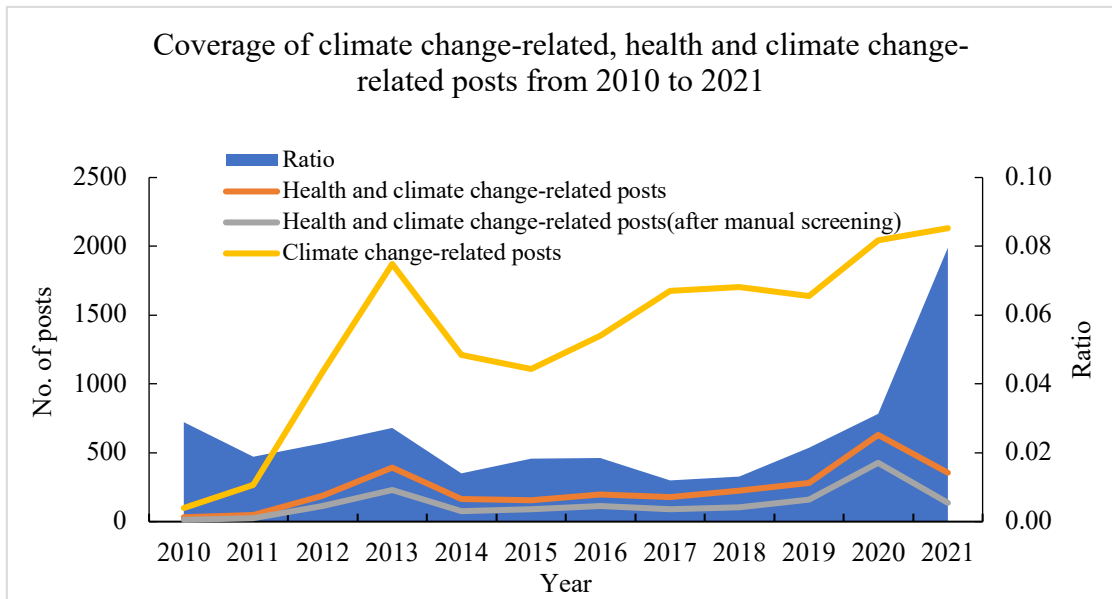

2694 **Figure 52:** Coverage of climate change, health and climate change on seven media accounts on  
 2695 Weibo from 2020 to 2021

2696

2697 **Step 4:** With a python-based crawler, all qualified posts published by seven Weibo accounts @People's  
 2698 Daily, @The Beijing News, @China Science Daily, @HealthTimes, @The Paper, @Xinhuanet,  
 2699 @China Meteorological News were collected from January, 2021 to December, 2021. 11 COVID-19  
 2700 related keywords were used, which are presented in **Table 49**. And the elderly related posts were selected  
 2701 from health and climate change-related posts by manual screening in 2021, which was showed in **Figure**  
 2702 **53**.

2703

2704

**Table 49: COVID-19 keywords for the search in Weibo**

| 中文 Chinese                                                                                         | 英文 English                                                                                                                        |
|----------------------------------------------------------------------------------------------------|-----------------------------------------------------------------------------------------------------------------------------------|
|                                                                                                    | COVID<br>Coronavirus<br>Corona                                                                                                    |
| 新冠* (新冠病毒, 新冠病毒肺炎, 新冠疫<br>情, 新冠病毒肺炎疫情)<br>新型冠状病毒                                                   | COVID*<br>coronavirus                                                                                                             |
| 疫情<br>冠状病毒<br>武汉肺炎<br>SARS<br>COVID* (COVID-19, COVID 19,<br>COVID19)<br>Coronavirus<br>SARS-CoV-2 | COVID-19<br>COVID 19<br>COVID19<br>Coronavirus<br>SARS-CoV-2<br>2019 novel coronavirus (for picking<br>up very early occurrences) |

2705

2706 **Table 50:** Elderly keywords



| 中文 Chinese | 英文 English       |
|------------|------------------|
| 老年         | The elderly      |
| 老人         | Old people       |
| 老齡         | Aging population |

2707  
2708

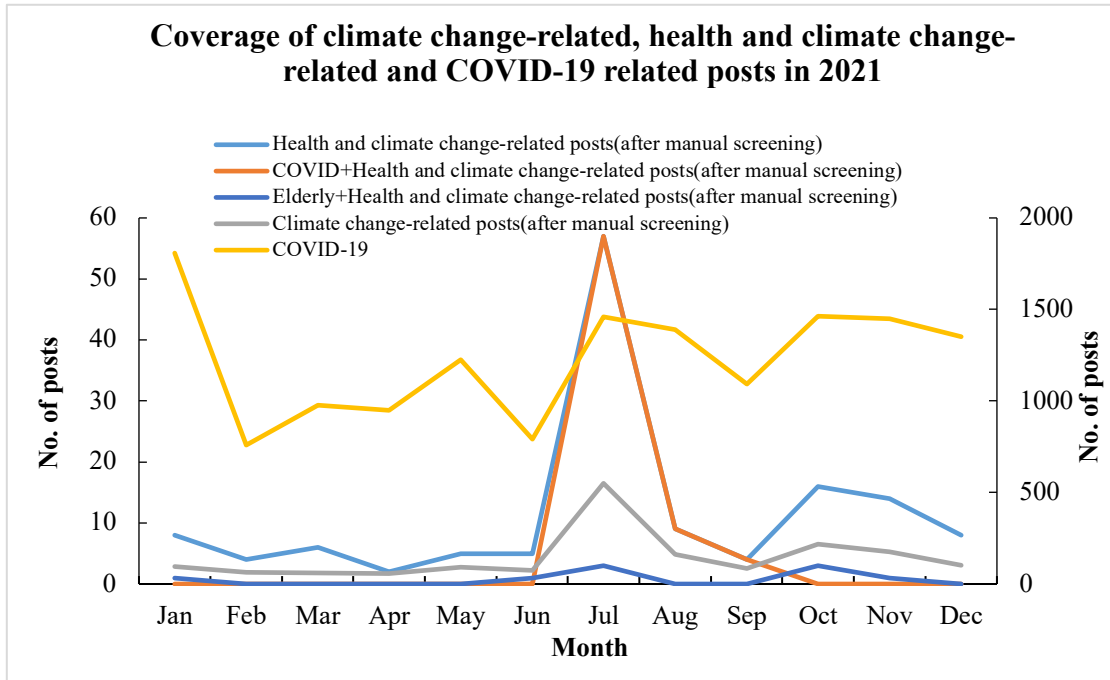

2709 **Figure 53** Coverage of elderly health and climate change of seven media (People’s daily, Xinhuanet, The  
2710 Paper, and The Beijing News, China Science Daily, Health Times, and China Meteorological News) on  
2711 Weibo in 2021  
2712  
2713

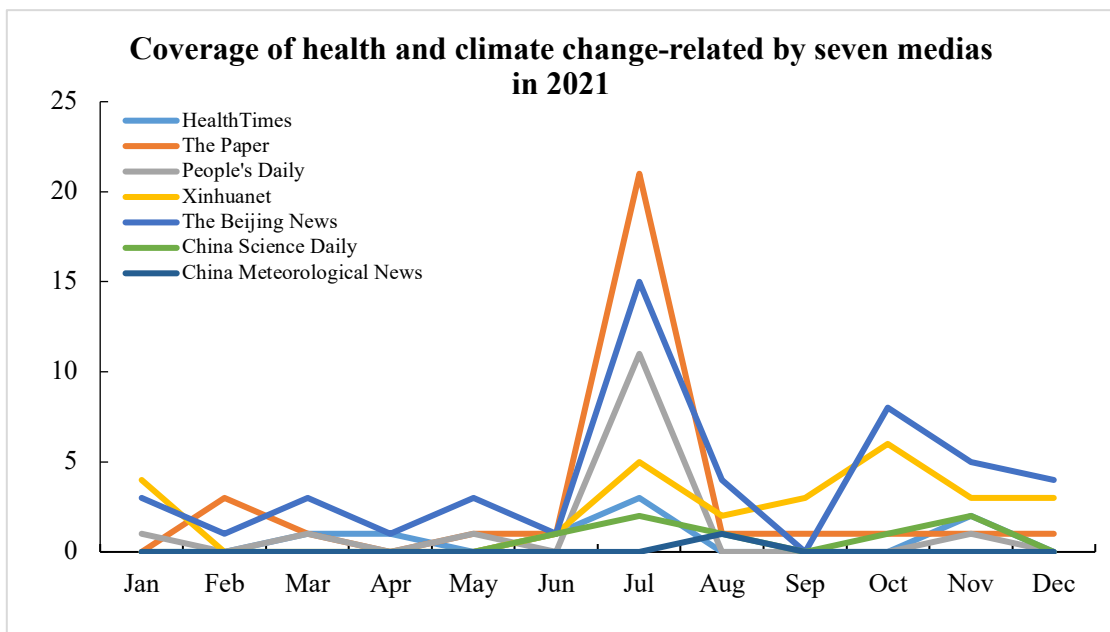

2714 **Figure 54** Coverage of health and climate change of seven media (People’s daily, Xinhuanet, The Paper,  
 2715 and The Beijing News, China Science Daily, Health Times, and China Meteorological News) on Weibo  
 2716 in 2021

2717  
 2718  
 2719

**Data**

2720 Between 2010 and 2021, an average of 1350 posts per year were made about climate change, with human  
 2721 health accounting for 9.76 percent, or 132 posts per year (after manual filtering). Around 7470 COVID-  
 2722 19 posts were published in 2021, with just 18 (after manual filtering) relating to both COVID-19 and  
 2723 health. There were just roughly 9 entries addressing the elderly and health-related issues in 2021.  
 2724

2725

**Future Form of Indicator**

2726 1. The keywords used in this research are obtained from the study of Media coverage of health and  
 2727 climate change for People’s Daily in China after manual screen, which is a traditional media. Therefore,  
 2728 the keywords should be more in line with the characteristics of social media in the future research.  
 2729

2730

**Additional Information**

2731 For the Lancet Countdown China 2022 Report, this study aims to find media coverage of health and  
 2732 climate change research on social media of China. Data was collected with a python-based crawler. The  
 2733 reasons are as follows:  
 2734

2735  
 2736  
 2737

First, selected the Chinese social media platform *Weibo* (<https://weibo.com/>), which has a very high usage rate in China.

2738

2739 Second, several types of media accounts on Weibo were selected, including official media such as @人  
 2740 民日报(People’s Daily), @新华社(Xinhuanet), commercial media such as @新京报(The Beijing News),  
 2741 @澎湃新闻(The Paper), and professional media @健康时报(Health Times), @中国科学报(China  
 2742 Science Daily) and (中国气象报) China Meteorological News.

2743  
 2744  
 2745

Lastly, due to the word limit of Weibo posts, posts are generally very short, so when searching for related posts, as long as a relevant keyword appears, it is regarded as a qualified post.

2746

**Indicator 5.1.2: Newspaper coverage of health and climate change in China**

2747  
 2748

**Methods**

2749

2750 Due to the influence of mainstream media on social media agenda, public perceptions, and public  
 2751 engagement,<sup>118-121</sup> this year the most influential newspaper in each of the 34 provinces was again tracked  
 2752 for their coverage of health and climate change (**Table 51**). Data were assembled by accessing archives  
 2753 through CNKI and WiseNews databases. To keep data consistency and comparability between indicators,  
 2754 search terms were aligned to those used for the indicator 5.1.1 with Boolean searches in Chinese. The  
 2755 search strategy was refined for the 2021 report to exclude false positives while retaining true positive  
 2756 articles. Newspaper articles from January 2008 to December 2021 were searched and downloaded for  
 2757 analysis of health and climate change in 34 newspapers selected to provide a national spread of  
 2758 influential papers.

2759

**Table 51: List of the 34 Chinese provincial newspapers**

| Provincial region | Newspaper | English translation |
|-------------------|-----------|---------------------|
| Anhui             | 安徽日报      | Anhui Daily         |
| Beijing           | 北京日报      | Beijing Daily       |

|                |       |                      |
|----------------|-------|----------------------|
| Chongqing      | 重庆日报  | Chongqing Daily      |
| Fujian         | 福建日报  | Fujian Daily         |
| Gansu          | 甘肃日报  | Gansu Daily          |
| Guangdong      | 南方日报  | South Daily          |
| Guangxi        | 广西日报  | Guangxi Daily        |
| Guizhou        | 贵州日报  | Guizhou Daily        |
| Hainan         | 海南日报  | Hainan Daily         |
| Hebei          | 河北日报  | Hebei Daily          |
| Heilongjiang   | 黑龙江日报 | Heilongjiang Daily   |
| Henan          | 河南日报  | Henan Daily          |
| Hong Kong      | 明报    | Ming Pao Daily       |
| Hubei          | 湖北日报  | Hubei Daily          |
| Hunan          | 湖南日报  | Hunan Daily          |
| Inner Mongolia | 内蒙古日报 | Inner Mongolia Daily |
| Jiangsu        | 新华日报  | Xinhua Daily         |
| Jiangxi        | 江西日报  | Jiangxi Daily        |
| Jilin          | 吉林日报  | Jilin Daily          |
| Liaoning       | 辽宁日报  | Liaoning Daily       |
| Macao          | 澳门日报  | Macao Daily          |
| Ningxia        | 宁夏日报  | Ningxia Daily        |
| Qinghai        | 青海日报  | Qinghai Daily        |
| Shaanxi        | 陕西日报  | Shaanxi Daily        |
| Shandong       | 大众日报  | Dazhong Daily        |
| Shanghai       | 解放日报  | Liberation Daily     |
| Shanxi         | 山西日报  | Shanxi Daily         |
| Sichuan        | 四川日报  | Sichuan Daily        |
| Taiwan         | 中国时报  | China Times          |
| Tianjin        | 天津日报  | Tianjin Daily        |
| Tibet          | 西藏日报  | Tibet Daily          |
| Xinjiang       | 新疆日报  | Xinjiang Daily       |
| Yunnan         | 云南日报  | Yunnan Daily         |
| Zhejiang       | 浙江日报  | Zhejiang Daily       |

2760

2761

2762

2763

2764

Firstly, climate change related keywords in accordance with the keywords in the 2021 global Lancet Countdown report, were used to track news articles of climate change. The keywords used are the same as indicator 5.1.1, and identical to last year's keywords to ensure comparability between indicators. The result is shown in **Figure 55**.

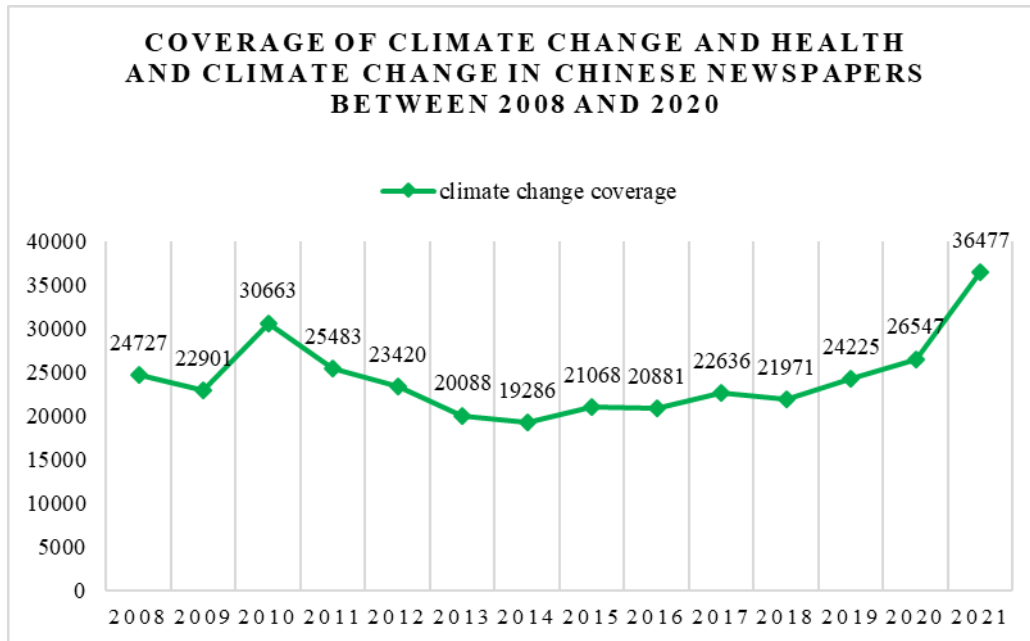

2765  
 2766  
 2767  
 2768  
 2769  
 2770  
 2771  
 2772  
 2773  
 2774  
 2775  
 2776  
 2777  
 2778  
 2779

**Figure 55** Number of climate-articles tracked in Chinese newspapers

Secondly, the climate-related and health-related key words were combined with Boolean searches. In the newspaper databases, the retrieval function was set as “keywords” and the relationship between the two groups of keywords as “and”. The relevant articles published from 2008 to 2021 were retrieved respectively.

Thirdly, machine filtration was conducted based on the parameter setting regarding newspaper coverage in the global Lancet Countdown report. The threshold of score for each article is set to be 10, meaning the times of appearance of the keywords from both climate change and health in one article should be no less than 10. The threshold of ratio for each article is set to be no less than 1%, meaning in every 100 characters in the article, there should be no less than 1 keyword. The results before and after machine filtration are presented in **Figure 56**.

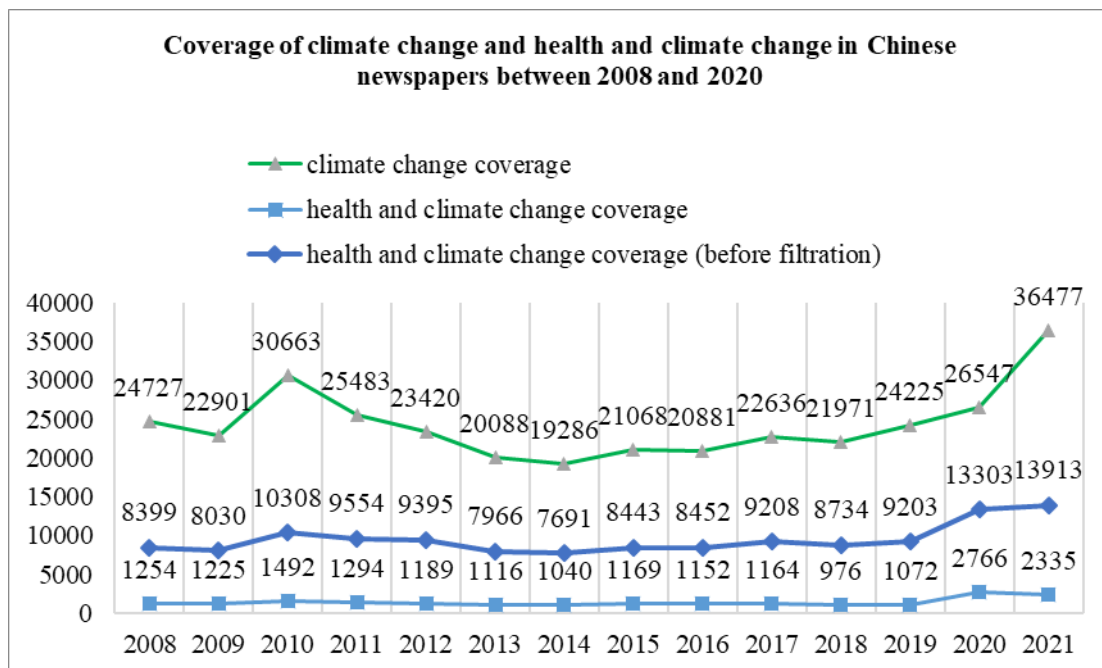

2780  
 2781

**Figure 56:** Numbers of climate-related articles (green line), health-related articles before machine

2782 **filtration (light blue line), and health-related articles after machine filtration (blue line)**

2783

2784 Fourthly, with special attention paid to COVID-19 pandemic, COVID-19 keywords were used to search  
2785 COVID-19 related articles within the newspaper coverage of health and climate change. The keywords  
2786 (**Table 52**) which are in accordance with the 2021 global report, are slightly different from the keywords  
2787 used in indicator 5.1.1.

2788

2789 **Table 52: Keywords for the COVID-19 search in Chinese newspapers**

| <b>Keywords for the COVID-19</b>                                       | <b>English translation</b>                                                                                                        |
|------------------------------------------------------------------------|-----------------------------------------------------------------------------------------------------------------------------------|
| COVID<br>新冠* (新冠病毒, 新冠病毒肺炎, 新冠疫情,<br>新冠病毒肺炎疫情)                         | COVID<br>Coronavirus<br>Corona                                                                                                    |
| COVID*<br>新型冠状病毒                                                       | COVID*<br>coronavirus                                                                                                             |
| COVID-19<br>COVID 19<br>COVID19<br>Coronavirus<br>冠状病毒<br>新冠肺炎<br>新冠疫情 | COVID-19<br>COVID 19<br>COVID19<br>Coronavirus<br>SARS-CoV-2<br>2019 novel coronavirus (for picking<br>up very early occurrences) |

2790

2791 Finally, this year articles on health and climate change that addressed the elderly or ageing population  
2792 were identified in the 2022 report, with the keywords “the elderly, older people, or ageing population”  
2793 (“老年” “老人” “老龄” in Chinese, seen **Table 53**) being used to search related articles within the  
2794 newspaper coverage of health and climate change.

2795

2796 **Table 53: Keywords for the elderly or aging population search in Chinese newspapers**

| <b>Keywords for the elderly or aging population</b> | <b>English translation</b> |
|-----------------------------------------------------|----------------------------|
| 老年                                                  | the elderly                |
| 老人                                                  | older people               |
| 老龄                                                  | ageing population          |

2797

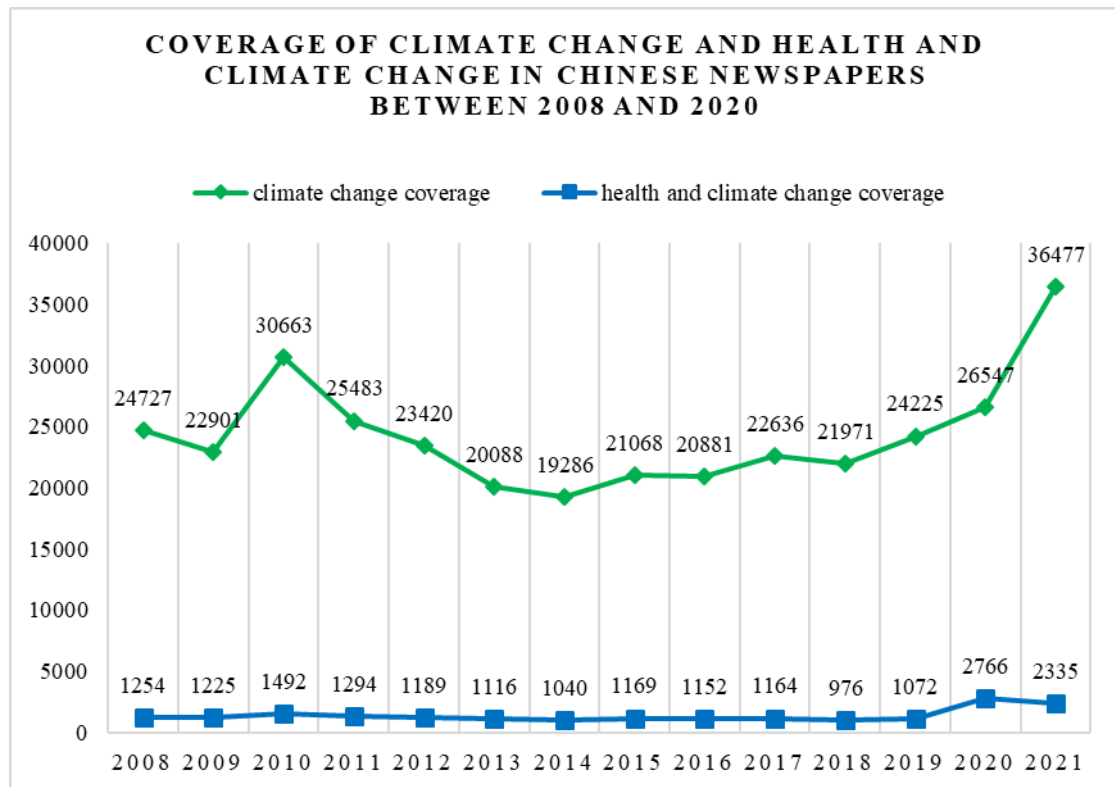

2798

2799 **Figure 57: Coverage of climate change and health and climate change in Chinese newspapers from**  
 2800 **2008 to 2021**

2801

2802 **Data**

- 2803 1. All the articles from 2008 to 2021 published on Chinese provincial newspapers (retrieved from  
 2804 CNKI and WiseNews Database);
- 2805 2. Choice of keywords in accordance with previous research of media coverage of health and climate  
 2806 change for People's Daily in China in the global Lancet Countdown report.<sup>11</sup>

2807 **Caveats**

2808 Firstly, the most influential provincial newspaper in each province or administrative division was  
 2809 selected, while there might be more than one influential newspaper in some province or administrative  
 2810 division. Therefore, this indicator only reflected the media coverage of the selected newspapers which  
 2811 do not cover all newspapers in China.

2812 Secondly, more than one newspaper databases were used to retrieve newspapers for data analyses, which  
 2813 may affect the comparability and consistency. CNKI and WiseNews as two main newspaper databases  
 2814 were used to retrieve newspaper data, since there is no single database include all the tracked newspapers.  
 2815 As for the two databases, the search function and format are not the same, which can affect the data  
 2816 retrieval and analysis of newspaper coverage.

2817 Thirdly, provincial newspapers were used for data analyses, but national newspapers, such as People's  
2818 Daily, as well as professional newspapers like China Meteorological News are not included. Analyses of  
2819 provincial newspapers show provincial difference in newspaper coverage of health and climate change,  
2820 while it is still possible to miss some coverage provided by national and professional newspapers.

### 2821 **Future Form of Indicator**

2822 In the future, the indicator of the media coverage of health and climate change based on newspaper data  
2823 will continue to be a primary data source to track this indicator. In the future, both national newspaper  
2824 such as People's Daily and provincial newspapers can be included to reflect national and local media  
2825 coverage of health and climate change.

2826

## 2827 **Indicator 5.2: Individual engagement in health and climate change**

### 2828 **Methods**

2829 Partnered with Baidu Inc., we collected search queries on Baidu search engine to reflect the individual's  
2830 public engagement in health and climate change, which is the same as the analysis of the 2020<sup>9</sup> and  
2831 2021<sup>19</sup> China Lancet Countdown report. Baidu is the most popular Chinese search engine accounting for  
2832 83.97% of the market share in China in 2021 according to StatCounter<sup>122</sup>. A set of keywords were  
2833 designed by this team of researchers to capture search queries related to health and climate change.  
2834 Compared with the 2021 China report<sup>19</sup>, we added a few keywords about extreme weather events, like  
2835 drought, flood, and winter storm, into the climate change keywords, to increase the coverage of the  
2836 climate change topic. We conducted special studies about the queries of the population ageing and the  
2837 queries of the COVID-19. Additionally, we also examined individual engagement of different  
2838 demographic groups. Especially, we analyzed the search queries about health and climate change to  
2839 reveal the individual engagement of different age groups. All data is anonymized and no queries can be  
2840 associated with an individual. All the queries were searched within the recent year (from 1<sup>st</sup> Jan. 2021 to  
2841 31<sup>st</sup> Dec. 2021).

2842 The queries are identified as health queries, climate change queries, and health & climate change co-  
2843 queries, if they contain at least one health keyword **Table 54**, at least one climate change keyword  
2844 (Table 55), and contain both health and climate change keywords, respectively. The query proportion  
2845 of climate change was calculated by using the number of identified climate change queries to divide the  
2846 total number of queries in the year 2021. The formula of query proportion can be formulated as:

$$2847 \quad \textit{climate change query proportion} = \frac{\textit{number of identified climate change queries}}{\textit{number of total queries}}$$

2848

2849 
$$\frac{\text{Health \& climate change co – queries}}{\text{Climate change queries}}$$

2850 
$$= \frac{\text{number of identified health\&climate change co – queries}}{\text{number of identified climate change queries}}$$

2851

2852 
$$\frac{\text{Health \& climate change co – queries}}{\text{Health queries}}$$

2853 
$$= \frac{\text{number of identified health\&climate change co – queries}}{\text{number of identified health queries}}$$

2854

2855 **Table 54:** Health-related keywords for the Baidu search

| Health-related keywords in Chinese | Health-related keywords in English |
|------------------------------------|------------------------------------|
| 健康                                 | Healthy                            |
| 疾病                                 | Disease                            |
| 养生                                 | Health preservation                |
| 保健                                 | Healthcare                         |
| 公共卫生                               | Public health                      |
| 疟疾                                 | Malaria                            |
| 死亡率                                | Mortality                          |
| 营养                                 | Nutrition                          |
| 营养不良                               | Malnutrition                       |
| 脱水                                 | dehydration                        |
| 发病                                 | Morbidity                          |
| 发病率                                | Morbidity                          |
| 发育迟缓                               | Stunting                           |
| 传染病                                | Communicable disease               |
| 慢性病                                | Chronic disease                    |
| 高血压                                | Hypertension                       |
| 肿瘤                                 | Tumour                             |
| 中风                                 | Apoplexy                           |
| 心脏病                                | Heart disease                      |
| 肺炎                                 | Pneumonia                          |
| 癌症                                 | Cancer                             |
| 肺癌                                 | Lung cancer                        |
| 肝癌                                 | Liver cancer                       |
| 糖尿病                                | diabetes                           |
| 肥胖                                 | Obesity                            |
| 身体超重                               | Overweight                         |
| 非传染性疾病                             | Non-communicable diseases          |



|           |                                          |
|-----------|------------------------------------------|
| 流行病       | Epidemic                                 |
| 流行病学      | Epidemiology                             |
| 腹泻        | Diarrhoea                                |
| SARS      | SARS                                     |
| 非典型肺炎     | Atypical pneumonia                       |
| 严重急性呼吸综合征 | Severe acute respiratory syndrome (SARS) |
| 重症急性呼吸综合征 | Severe acute respiratory syndrome (SARS) |
| 麻疹        | Measles                                  |
| 早产        | Premature                                |
| 流产        | Abortion                                 |
| 抑郁障碍      | Depressive disorder                      |
| 抑郁症       | Depression                               |
| 心理障碍      | Psychological disorders                  |
| 心理问题      | Psychological problems                   |
| 心理疾病      | Mental illness                           |
| 精神障碍      | Mental disorders                         |
| 精神病       | Mental disease                           |
| 精神疾病      | Mental illness                           |
| 精神健康      | Mental health                            |

2856

2857

**Table 55:** Climate change-related keywords

| Climate change-related keywords in Chinese | Climate change-related keywords in English |
|--------------------------------------------|--------------------------------------------|
| 气候变化                                       | Climate change                             |
| 气候变暖                                       | Climate warming                            |
| 全球变暖                                       | Global warming                             |
| 全球暖化                                       | Global warming                             |
| 全球温度升高                                     | Global temperature rise                    |
| 全球气温升高                                     | Global temperature rise                    |
| 地球温度升高                                     | The rise of the earth's temperature        |
| 海平面上升                                      | Sea level rise                             |
| 冰川融化                                       | Glacial melting                            |
| 温室效应                                       | Greenhouse effect                          |
| 温室气体排放                                     | Greenhouse gas emissions                   |
| 碳排放                                        | Carbon emission                            |
| 二氧化碳排放                                     | CO2 emission                               |
| 碳减排                                        | Carbon emission reduction                  |
| 二氧化碳减排                                     | Carbon dioxide reduction                   |
| 温室气体减排                                     | Greenhouse gas emission reduction          |

|        |                             |
|--------|-----------------------------|
| 全球环境变化 | Global environmental change |
| 气候变异   | Climate variability         |
| 极端天气   | Extreme weather             |
| 干旱     | Drought                     |
| 洪灾     | Flood disaster              |
| 水灾     | Flood disaster              |
| 特大洪水   | Cataclysm                   |
| 雪灾     | Snow disaster               |

2858 To identify the COVID-19 queries, a set of keywords was also developed by this team of researchers,  
2859 (Table 56). The queries that contain at least one COVID-19 keyword were identified as COVID-19  
2860 queries. Similar to the health & climate change co-queries, the queries with keywords from both (i)  
2861 COVID-19, and (ii) climate change were identified as COVID19&climate change co-queries. The  
2862 formula for calculating COVID19 query proportion and COVID19&climate change co-query proportion  
2863 is:

$$2864 \text{ COVID19 query proportion} = \frac{\text{number of identified COVID19 queries}}{\text{number of total queries}}$$

$$2865 \text{ COVID19\&climate change co – query proportion} = \frac{\text{number of identified COVID19\&climate change co – queries}}{\text{number of total queries}}$$

2866  
2867  
2868  
2869  
2870 **Table 56: COVID-19 keywords**

| COVID-19 keywords in Chinese | COVID-19 keywords in English       |
|------------------------------|------------------------------------|
| 新冠肺炎                         | Novel coronavirus pneumonia        |
| 新型冠状病毒肺炎                     | The new type of coronary pneumonia |
| 新型冠状病毒                       | Novel coronavirus                  |
| 新冠病毒                         | Novel coronavirus                  |
| COVID                        | COVID                              |

2871 In this report, we also introduced a set of keywords to identify the queries about population ageing (Table  
2872 57). The queries that contain at least one population ageing keyword were identified as population ageing  
2873 queries. The queries with keywords from both (i) population ageing, and (ii) climate change were  
2874 identified as population ageing & climate change co-queries. The formula for calculating population  
2875 ageing query proportion and population ageing & climate change co-query proportion is:

$$2876 \text{ population ageing query proportion} = \frac{\text{number of identified population ageing queries}}{\text{number of total queries}}$$

2877  
2878

2879 population ageing&climate change co – query proportion  
 2880 = 
$$\frac{\text{number of identified population ageing\&climate change co – queries}}{\text{number of total queries}}$$

2881 **Table 57:** Population ageing keywords

| 中文 Chinese | 英文 English       |
|------------|------------------|
| 老年         | The elderly      |
| 老人         | Old people       |
| 老齡         | Aging population |

2882 The designed indicator was also calculated in different demographic groups to show the demographical  
 2883 distribution of query proportion in China. Note that none of the queries of this study can be associated  
 2884 with a particular individual. For each demographic group (like the users with different ages) in China,  
 2885 the climate change query proportion and health query proportion were calculated with the number of  
 2886 identified health or climate change queries of this demographic group as the numerator, and with the  
 2887 number of total queries of this demographic group as the denominator. Similarly, for visualizing the query  
 2888 distribution in the province level, the query proportion was calculated with the number of identified  
 2889 queries in this province as the numerator, and with the number of total queries in this province as the  
 2890 denominator.

2891 **Data**

2892 The search query data were based on search query logs from the search engine provided by Baidu Inc.  
 2893 All the analytics of this indicator were conducted on Baidu’s servers by researchers from Baidu. Each  
 2894 query record only contained the query, the submission time, the submission city, and a few demographical  
 2895 properties indicated by the submission user without any identifying information of the user. The  
 2896 demographical properties of users were determined through a deep learning user profiling prediction  
 2897 platform within Baidu using big data like user queries, location, and other data. Any of the original search  
 2898 logs are being processed and used with respect to Baidu’s privacy policy  
 2899 (<https://www.baidu.com/duty/yinsiquan.html>).

2900 **Caveats**

2901 First of all, this indicator for individual engagement based on the search query data is biased towards  
 2902 attention from typical internet users. Though Baidu takes the majority of the market share in China, it  
 2903 does not cover all population groups in China. Some population groups do not actively use the search  
 2904 engine such as the elderly, children, and less educated people.

2905 Second, the analysis of the demographical groups will be affected by the prediction accuracy of Baidu’s  
 2906 user profiling platform. According to statistics, the accuracy of the education level label of the user  
 2907 profiling platform is 81%, the one of gender label is about 89%, and the one of age groups is about 79%.  
 2908 It is almost impossible to have 100% prediction accuracy. However, such prediction performance is high  
 2909 enough for many enterprise applications in the company.

2910 Third, the coverage of keywords influences on the final results. All the queries were identified by  
 2911 keywords which have been enumerated with the best effort. However, it is still possible to miss some  
 2912 keywords to identify the related queries.

2913 **Future Form of Indicator**

2914 In the future, the indicator will continue to use search engine data as primary data to track individual  
 2915 engagement. More analysis about the co-query of climate change and some specific events (like extreme  
 2916 weathers and disasters) can be conducted to reflect different concerns between climate change and health.

2917 **Additional Information**

2918 **Table 58:** Queries (per hundred thousand) related to health and climate change in 2018-2021

| Year                                                                                 | 2018   | 2019    | 2020    | 2021    |
|--------------------------------------------------------------------------------------|--------|---------|---------|---------|
| $\frac{\text{\# of climate change queries}}{\text{\# of total queries}}$             | 2.921  | 2.785   | 3.199   | 5.677   |
| $\frac{\text{Health \& climate change co – queries}}{\text{Climate change queries}}$ | 93.217 | 124.374 | 318.219 | 471.438 |
| $\frac{\text{Health \& climate change co – queries}}{\text{Health queries}}$         | 0.652  | 0.747   | 1.192   | 4.763   |

2919  
 2920 As shown in Table 58, there is a continuously rising trend from 2018 to 2021 for individual engagement  
 2921 in health and climate change. From 2020 to 2021, the climate change queries of 2021 increased by 77.5%  
 2922 compared with the ones of 2020, and the health & climate change co-queries over climate change queries  
 2923 of 2021 increased by 48.15% compared with the ones of 2020. While the proportion of queries related to  
 2924 climate change continued to increase in the past four years, the queries for health and climate change are  
 2925 still seldom co-searched by users, but have a notable rising trend.

2926  
 2927 One possible reason for such increase is that the Government of China has released two of the most  
 2928 significant policy documents (*Working Guidance for Carbon Dioxide Peaking and Carbon Neutrality in*  
 2929 *Full and Faithful Implementation of the New Development Philosophy*<sup>123</sup> and *Action Plan for Carbon*  
 2930 *Dioxide Peaking Before 2030*<sup>124</sup>) on its climate response plan. These documents form the basis of China’s  
 2931 policy framework to achieve the goals of peaking carbon emissions and subsequent carbon neutrality.  
 2932 These actions from the government should draw much attention from individuals. The other possible

2933 reason is that the events like the COVID-19 pandemic and the 2021 Henan floods in China make more  
 2934 individuals pay attention to the relations between climate change and public health/safety.

2935

2936 **Table 59:** Queries (per hundred thousand) related to population ageing and climate change in 2018-2021

| Year                                                                                               | 2018   | 2019   | 2020   | 2021   |
|----------------------------------------------------------------------------------------------------|--------|--------|--------|--------|
| $\frac{\# \text{ of population ageing queries}}{\# \text{ of total queries}}$                      | 58.576 | 71.726 | 80.780 | 88.477 |
| $\frac{\text{population ageing \& climate change co – queries}}{\text{Climate change queries}}$    | 9.927  | 9.688  | 14.313 | 6.875  |
| $\frac{\text{population ageing \& climate change co – queries}}{\text{population ageing queries}}$ | 0.495  | 0.376  | 0.567  | 0.441  |

2937

2938 Future analysis in Table 59 also shows that the proportion of population ageing queries has a notable  
 2939 rising trend from 2018 to 2021. From 2019 to 2020 the population ageing queries of 2020 increased by  
 2940 12.6% compared with the ones of 2019, and from 2020 to 2021 the population ageing queries of 2021  
 2941 increased by 9.53% compared with the ones of 2020. This indicates that population ageing has been  
 2942 recognized as a topical issue in China. However, there is still no clear trend for the population ageing &  
 2943 climate change co-queries as shown in Table 59. It indicates that people in China seldomly realize the  
 2944 consequence challenges alongside the population aging and climate change.

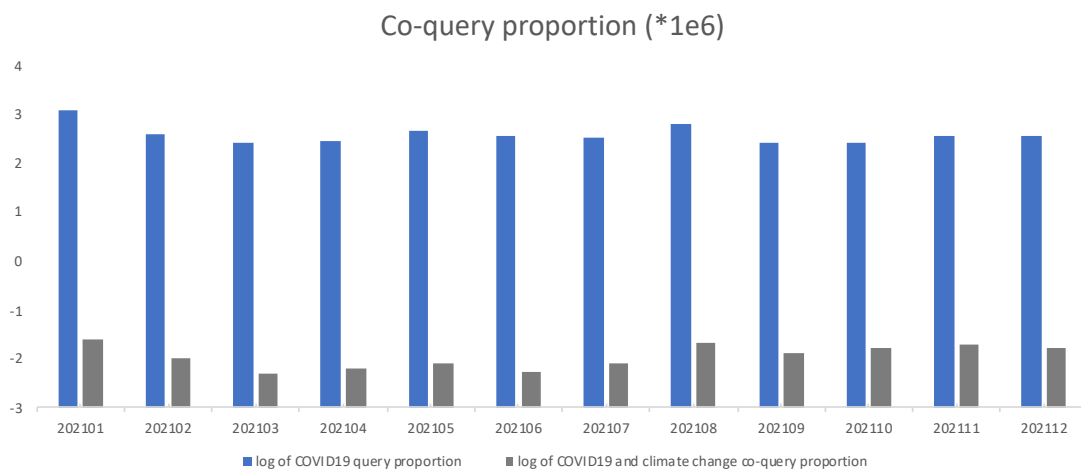

2945

2946 **Figure 58** Queries (per million) from month to month in 2021 of COVID-19 and COVID-19&climate  
 2947 change (per million). Note that the Y- axes are logarithmic axes (with base 10).

2948

2949 Figure 59 shows the query proportion from month to month in 2021 of COVID-19 and COVID-  
 2950 19&climate change. In 2021, there were two peaks of the query proportion of COVID-19 which were at  
 2951 the beginning (January) and the middle (August) of 2021. These two peaks correspond to two waves of  
 2952 the outbreak of COVID-19 pandemic in mainland China. Whereas, the peaks of COVID-19&climate  
 2953 change co-queries also appeared in the same months. This indicates that the COVID-19 pandemic does  
 2954 draw more individual attention to the climate change challenge of our earth.

2955

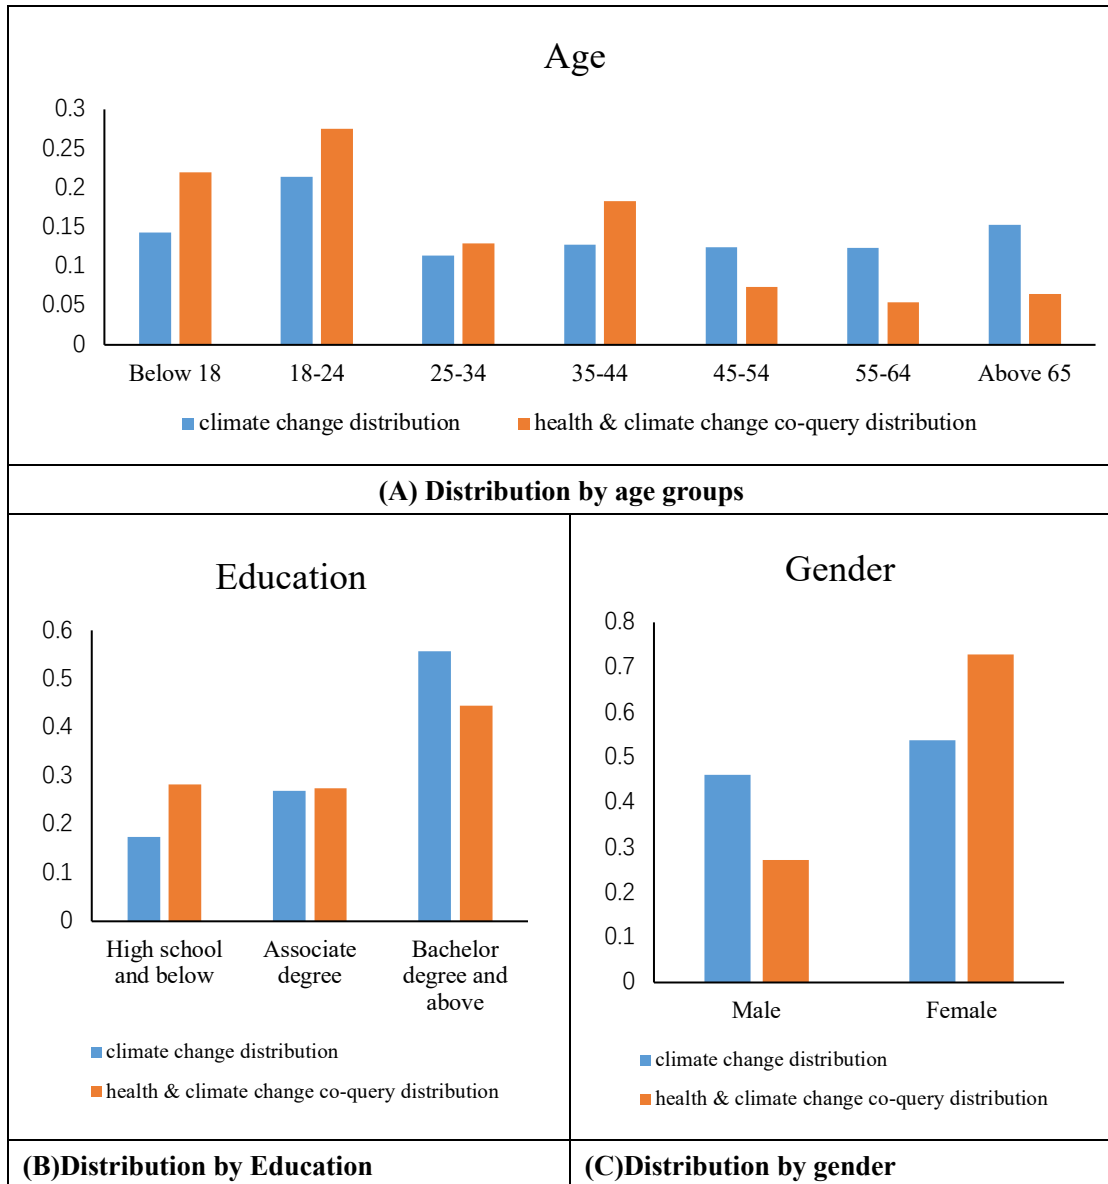

2956 **Figure 59** The distribution of the proportion of the queries related to climate change and health &  
 2957 climate change query of demographic groups in China in 2021. (Note that the figures show the  
 2958 histogram distribution of the queries per person with a partial demographical property. The sum  
 2959 of the distribution on each demographical group (with the same color) equals to one. For example,  
 2960 the climate change queries of male and female in figure (C) equals one.)  
 2961

2962 Analysis of different age groups indicated that the elderly was lack of awareness of health threat caused  
 2963 by climate change. As shown in *Figure 59* (a), compared with the other middle age groups (above 25),  
 2964 the elderly (above 65) had a relatively similar query proportion of the climate change queries, but had a  
 2965 much lower proportion of the health & climate change co-queries. Taking a look at the 35-44 age group,  
 2966 the number of climate change queries of the elderly was 119.68% of one of the 35-44 age group.  
 2967 Meanwhile, the number of the health & climate change co-queries of the elderly was only 35.57% of one  
 2968 of the 35-44 age group. Moreover, the analysis also shows that female people and people with tertiary  
 2969 education had a higher number of climate change queries and health & climate change co-queries. As

2970 shown in *Figure 59* (b), the number of health & climate change queries per person with bachelor degree  
 2971 or above was 157.86% and 162.36% of the person with high school or below degree and associate degree,  
 2972 respectively. And *Figure 59*(c) shows that the number of health & climate change co-query per female  
 2973 person was 268.69% of one of per male person.  
 2974

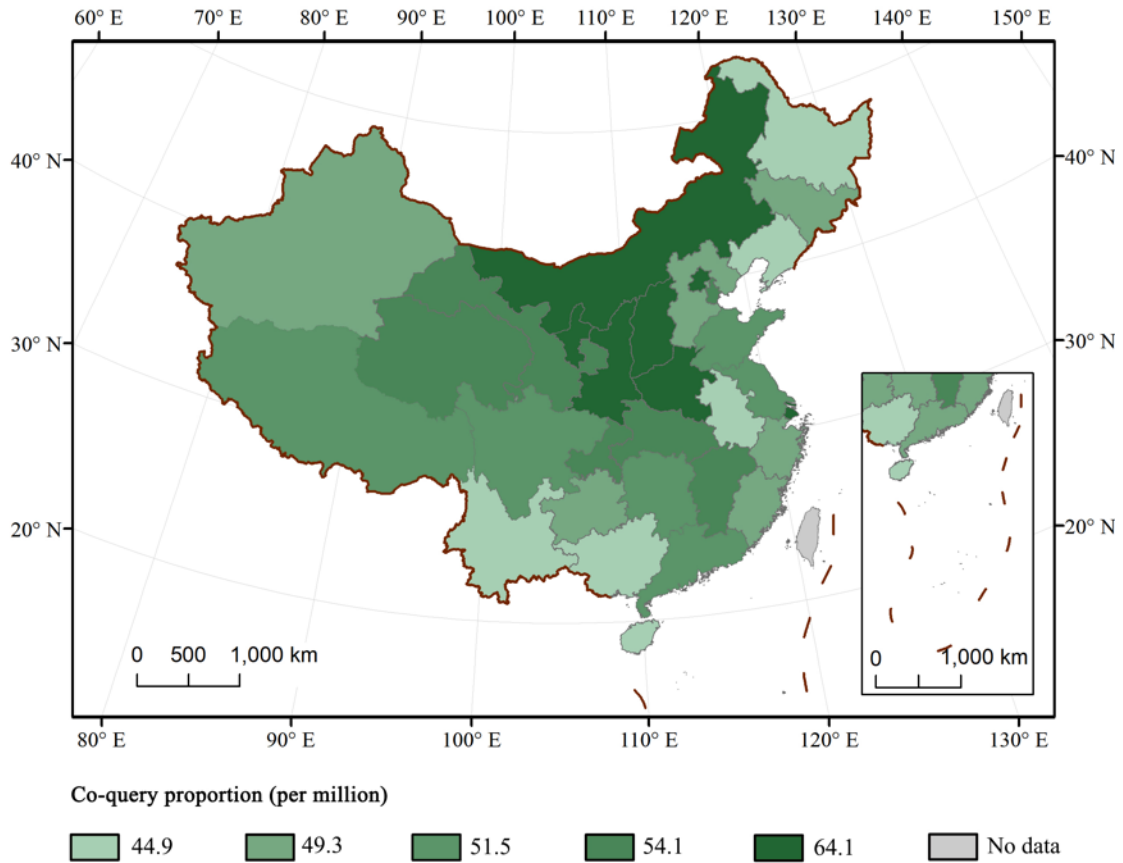

2975  
 2976 **Figure 60** The distribution of the proportion of the queries related to climate change in different  
 2977 provinces in China in 2021

2978  
 2979 The figure illustrates the proportion of the queries related to climate change in different provinces. On  
 2980 the one hand, similar to the 2021 China Lancet Countdown report<sup>19</sup>, Northern China (like Inner Mongolia)  
 2981 and Western China (like Ningxia and Gansu) have a substantial proportion of climate change queries. On  
 2982 the other hand, the Henan province, which had a flood disaster in 2021, and its nearby provinces Shaanxi  
 2983 province and Shanxi province, which also had floods in 2021, had a larger proportion of climate change  
 2984 queries than other areas in China. This indicates that extreme weather event makes more people engage  
 2985 in the climate change concern.

2986

2987 **Indicator 5.3: Coverage of health and climate change in scientific journals**

2988 **Method**

2989 This indicator tracked the coverage of climate change and health in both Chinese and English  
 2990 journals.

2991

2992 On English studies, this study used an algorithm to crawl articles containing concepts related to  
 2993 climate change and health in the titles, abstracts and keywords of the Scopus and Medline database  
 2994 from January 1, 2009 to December 31, 2021. And the titles and abstracts of the Web of Science Core  
 2995 Collections database contain concepts related to climate change and health in the same period. (as  
 2996 shown in **Table 60**)

2997

2998 After data scraping, this study used supervised machine learning to screen articles. First, we selected  
 2999 about 10% of the articles, cross-reviewed the categories by multiple team members, and finally  
 3000 determined whether the articles were relevant to climate change and health. Then we repeatedly  
 3001 train the machine with these samples, and finally make predictions on the entire data. The algorithm  
 3002 provides a score between 0 and 1, and articles with a score greater than 0.5 are included in the final  
 3003 research sample. In the end, a total of 19,287 eligible articles were collected.

3004

3005 Then, this study uses 'geoparsers' to identify the author's country. Geoparsers are dictionary-based  
 3006 methods or pre-trained models capable of extracting geographic place names from text. We will use  
 3007 geoparser to determine the country of the first author of a paper. In the end, 698 articles that were  
 3008 Chinese scholars were selected.

3009

3010 **Table 60. Summary of search strings<sup>1</sup>**

| Theme                                                                                              | Key concepts                                                                                                                                | String (Scopus )                                                                                                                                                                                                                                                                                                                                                                                                                                                                                                                                                           |
|----------------------------------------------------------------------------------------------------|---------------------------------------------------------------------------------------------------------------------------------------------|----------------------------------------------------------------------------------------------------------------------------------------------------------------------------------------------------------------------------------------------------------------------------------------------------------------------------------------------------------------------------------------------------------------------------------------------------------------------------------------------------------------------------------------------------------------------------|
| <b>Climate change</b><br>(contains at least one of the following climate terms, from any category) | General climate change terms                                                                                                                | (climat* OR “global warming” OR “greenhouse effect*”)                                                                                                                                                                                                                                                                                                                                                                                                                                                                                                                      |
|                                                                                                    | Greenhouse gasses, including short-lived greenhouse gasses, when linked to emission or mitigation. Some astronomy results are filtered out. | ((“carbon dioxide” OR co2 OR methane OR ch4 OR “nitrous oxide” OR n2o OR “nitric oxide” OR “nitrogen dioxide” OR nox OR *chlorofluorocarbon* OR *cfc* OR refrigerant OR hydrofluorocarbon* OR hfc* OR *chlorocarbon* OR “carbon tetrachloride” OR ccl4 OR halogen* OR ozone OR o3 OR ammonia OR nh3 OR “carbon monoxide” OR co OR “volatile organic compounds” OR nmvoc OR “hydroxyl radical” OR “oh” OR “pm2.5” OR aerosol OR “black carbon” OR “organic carbon” OR “sulphur dioxide” OR “oxidized sulphur” OR “so2” OR “sox” OR “sulphuric acid” OR so4* ) W/2 (emit* OR |

<sup>1</sup> Each of the strings is connected by a boolean ‘OR’. The Scopus search string is given here; for Web of Science and Medline, the syntax is different, and some other minor changes were made, most notably removing left-truncated keywords. Search hits shown in the table were conducted on 9 April 2020. Note the following data search functions: \* = any subsequent letters; W/# = maximum number of words allowed between the term directly to the left and that directly to the right of the W/#; and ? = any letter or space to replace the “?”.



|                                                                                               |                                                                                                                                            |                                                                                                                                                                                                                                                                            |
|-----------------------------------------------------------------------------------------------|--------------------------------------------------------------------------------------------------------------------------------------------|----------------------------------------------------------------------------------------------------------------------------------------------------------------------------------------------------------------------------------------------------------------------------|
|                                                                                               |                                                                                                                                            | emission OR releas* OR mitigat*) AND NOT(star OR “solar system”))                                                                                                                                                                                                          |
|                                                                                               | Climate variability indicators/climate indices                                                                                             | (temperature* OR precipitat* OR rainfall OR “heat ind*” OR “extreme-heat event*” OR “heat-wave” OR “extreme-cold*” OR “cold ind*” OR humidity OR drought* OR hydroclim* OR monsoon OR “el niSo” OR enso OR SOI OR “sea surface temperature*” OR sst)                       |
|                                                                                               | Complex climate indices, including extreme weather events, floods, wildfire, and coastal changes. Some paleo-climatic events are excluded. | (snowmelt* OR flood* OR storm* OR cyclone* OR hurricane* OR typhoon* OR “sea-level” OR wildfire* OR “wild-fire*” OR “forest-fire*” OR ( ( extreme W/1 event* ) AND NOT paleo* ) OR “coast* erosion” OR “coastal change*” OR ( disaster* W/1 ( risk OR manag* OR natural))) |
| <b>AND Health</b><br>(contains at least one of the following health terms, from any category) | General health terms                                                                                                                       | (health* OR wellbeing OR ill OR illness OR disease* OR syndrome* OR infect* OR medical*)                                                                                                                                                                                   |
|                                                                                               | General health outcomes                                                                                                                    | (mortality OR daly OR morbidity OR injur* OR death* OR hospital* OR OR emergency OR emergencies OR doctor OR gp)                                                                                                                                                           |
|                                                                                               | Nutrition, including obesity and undernutrition                                                                                            | (obes* OR over?weight OR under?weight OR hunger OR stunting OR wasting OR undernourish* OR undernutrition OR anthropometr* OR malnutrition OR malnour* OR anemia OR anaemia OR “micronutrient*” OR “micro?nutrient*” OR diabet*)                                           |
|                                                                                               | Cardio-vascular terms. Some studies on Chemical Vapour Deposition (CVD) are excluded.                                                      | (hypertension OR “blood pressure” OR stroke OR *vascular OR (cvd AND NOT(vapour or vapor)) OR “heart disease” OR isch?emic OR cardio?vascular OR “heart attack*” OR coronary OR chd)                                                                                       |
|                                                                                               | Renal health terms                                                                                                                         | (ckd OR renal OR cancer OR kidney OR lithogenes*)                                                                                                                                                                                                                          |
|                                                                                               | Effects of temperature extremes                                                                                                            | ((heat W/2 (stress OR fatigue OR burn* OR stroke OR exhaustion OR cramp* ) ) OR skin OR fever* OR renal* OR rash* OR eczema* OR “thermal stress” OR hypertherm* OR hypotherm*)                                                                                             |
|                                                                                               | Maternal health outcomes                                                                                                                   | (pre?term OR stillbirth OR birth?weight OR lbw OR maternal OR pregnan* OR gestation* OR *eclampsia OR sepsis OR oligohydramnios OR placenta* OR haemorrhage OR hemorrhage)                                                                                                 |
|                                                                                               | Vector-borne diseases                                                                                                                      | (malaria OR dengue* OR mosquito* OR chikungunya OR leishmaniasis OR encephalit* OR vectorborne OR pathogen OR zoonos* OR zika OR “west nile” OR onchocerciasis OR filariasis OR lyme OR tick?borne)                                                                        |
|                                                                                               | Bacterial, parasitic and viral infections, including waterborne and foodborne diseases                                                     | (waterborne OR “water borne” OR diarrhoea* OR diarrhe*1 OR gastro* OR enteric OR *bacteria* OR viral OR *virus* OR parasit* OR vibrio* OR cholera OR protozoa* OR salmonella OR giardia OR shigella OR campylobacter OR food?borne OR aflatoxin OR pois)                   |
|                                                                                               | Respiratory outcomes                                                                                                                       | (respiratory OR allerg* OR lung* OR asthma* OR bronchi* OR pulmonary* OR copd OR rhinitis OR wheez*)                                                                                                                                                                       |
|                                                                                               | Mental health outcomes                                                                                                                     | (mental OR depress* OR *stress* OR anxi* OR                                                                                                                                                                                                                                |

|  |                |                                                         |
|--|----------------|---------------------------------------------------------|
|  |                | ptsd OR psycho* OR *trauma* OR suicide* OR solastalgi*) |
|  | Health systems | [no additional terms needed]                            |

3011

3012 On Chinese studies, this study uses keywords, including climate change and climate change- and  
3013 health related keywords in the titles, abstracts or keywords of papers from January 1, 2009 to  
3014 December 31, 2021 in CNKI. Articles were retrieved from academic journals, master's and doctoral  
3015 dissertation repositories, and conference papers. After searching, a total of 5777 articles with titles,  
3016 abstracts or keywords containing climate change and health keywords were collected. Next, we  
3017 manually removed the following articles: (1) unrelated to health, (2) without annotated authors, (3)  
3018 articles in English. We ended up with 874 journal journals and conference papers.

3019

3020

**Table 61: Keywords**

| Climate change related                                    |                              | Climate change- and health related                |                |
|-----------------------------------------------------------|------------------------------|---------------------------------------------------|----------------|
| English                                                   | Chinese                      | English                                           | Chinese        |
| Climate change                                            | 气候变化                         | Health<br>Human health                            | (人类) 健康        |
| Global warming                                            | 全球变暖                         | Disease                                           | 疾病             |
| Greenhouse gas emission<br>Greenhouse effect              | 温室 (气体排放、气<br>体减排、效应、气<br>体) | Infectious disease<br>Non-communicable<br>disease | (非传染性、传染)<br>病 |
| Carbon emissions                                          | 二氧化碳减排                       | Dengue                                            | 登革热            |
| Drought                                                   | 干旱                           | Heart disease                                     | 心脏病            |
| Bushfire                                                  | 野火                           | Mortality rate                                    | 死亡率            |
| Tropical cyclone                                          | 热带气旋                         | Years of life lost                                | 寿命损失年          |
| Heatwave                                                  | 热浪                           | Vector                                            | 媒介生物           |
| Extreme weather                                           | 极端天气                         | Insect vector                                     | 虫媒             |
| ozone                                                     | 臭氧                           | Health risk                                       | 健康风险           |
| Extreme high<br>temperature<br>Extreme low<br>temperature | 极端 (高温、低温)                   | Emergency                                         | 急诊             |
| Rainstorm                                                 | 暴雨                           | Respiratory disease                               | 呼吸系统疾病         |
| Flood                                                     | 洪水                           | Non-accidental                                    | 非意外死亡          |

|  |  |                             |        |
|--|--|-----------------------------|--------|
|  |  | Coronary heart disease      | 冠心病    |
|  |  | Stroke                      | 脑卒中    |
|  |  | Acute myocardial infarction | 急性心肌梗死 |
|  |  | Death risk                  | 死亡风险   |
|  |  | Die                         | 死亡     |
|  |  | Adapt                       | 适应     |
|  |  | Chronic                     | 慢性病    |
|  |  | Nutrition                   | 营养     |
|  |  | Dehydration                 | 脱水     |
|  |  | Morbidity                   | 发病     |
|  |  | Mental health               | 精神疾病   |
|  |  | Aging                       | 老龄化    |
|  |  | Elderly                     | 老年人    |

3021

3022 **Indicator 5.4: Health and climate change in the Chinese government**

3023

3024 **Methods**

3025 Two steps to filter the articles, as shown below: Key words for the topics of (a) Climate Change, and (b)

3026 Health were identified as shown in Table 62.

3027

3028 **Table 62:** Chinese keywords for the search in Chinese government website

| 气候变化关键词 | 健康相关关键词 |
|---------|---------|
| 气候变化    | 疟疾      |
| 全球变暖    | 腹泻      |
| 温室      | 感染      |
| 极端天气    | 肺炎      |
| 全球环境变化  | 流行病     |
| 低碳      | 公共卫生    |
| 可再生能源   | 卫生      |
| 碳排放     | 发病      |
| 二氧化碳排放  | 营养      |
| 气候污染    | 精神障碍    |
| 气候      | 发育      |
| 全球升温    | 传染      |
| 再生能源    | 疾患      |
| CO2 排放  | 症       |
| 温室气体    | 瘟疫      |
| 极端气候    | 流感      |

|       |        |
|-------|--------|
| 高温    | 流行感冒   |
| 变暖    | 治疗     |
| 排放    | 保健     |
| 环境变化  | 健康     |
| 升温    | 死亡     |
| 全球温升  | 精神疾病   |
| 热浪    | 精神病    |
| 暴雨    | 登革热    |
| 气温    | 饥饿     |
| 洪水    | 粮食     |
| 洪灾    | 有害     |
| 气候反常  | 皮肤病    |
| 野火    | 风湿     |
| 山火    | 呼吸系统疾病 |
| 雪灾    | 人类健康   |
| 低温    | 人体健康   |
| 年代际   | 身体健康   |
| 冰雪    | 心脏病    |
| 可持续发展 | 糖尿病    |
| 海洋酸化  | 疾病     |
| 静稳    | 热死     |
|       | 口罩     |
|       | 防护     |
|       | 老人     |
|       | 老龄     |
|       | 老年     |

3029

3030

3031 The detailed steps of the method are shown as below:

3032 **Step 1: Crawling all the climate change articles from 2021.1.1 to 2021.12.31 on Chinese government**  
3033 **website**

3034 With a python-based crawler, all qualified articles published by four Chinese government official  
3035 websites China Meteorological Administration, National Development and Reform Commission,  
3036 National Health Commission of the People's Republic of China, Ministry of Ecology and Environment  
3037 of the people's Republic of China were collected from January, 2008 to December, 2020. 11 climate  
3038 change related keywords were used in the column of "Climate Change" in Table 62, which is in  
3039 accordance with the new climate change keywords used in the *MJA-Lancet Countdown on health and*  
3040 *climate change: Australian policy inaction threatens lives* (Zhang, et al., 2018). The keywords are  
3041 presented in the column of "Climate Change" in Table 62.

3042

3043 **Step 2: Searching for health-related articles**

3044 It was examined whether these posts show concern for public health by searching health-related  
3045 keywords, which is presented in the column of "Health" in Table 62. Our choice of health keyword list  
3046 followed previous research of Australia<sup>117</sup>. If a post contains at least 1 health-related word and word  
3047 frequency ratio in the whole post is greater than 0.01, this article is regarded as relevant to health topics.

3048

3049

3050 **Step 3: Systematic sampling and manual screening was added to test the positive rate**

3051

3052 We add manual screening process to test the data of health and climate change related articles. 181 was  
3053 selected from a total number of 821 articles by four government official websites in the year of 2021 after  
3054 manual screen with a false positive rate of 0.20. Systematic sampling was used to test the false positive  
3055 rate of climate change related articles. 22 articles were selected from 2220 as a sample in the year of

3056 2021 of four government official websites and the false positive rate was 0.15.

3057

3058 **Step 4: Searching for elderly articles in health and climate change related articles.**

3059

3060 We screen “the elderly, old people, aging population” 3 keywords in health and climate change related

3061 articles (after manual screening) as the Figure 2 below.

3062

3063

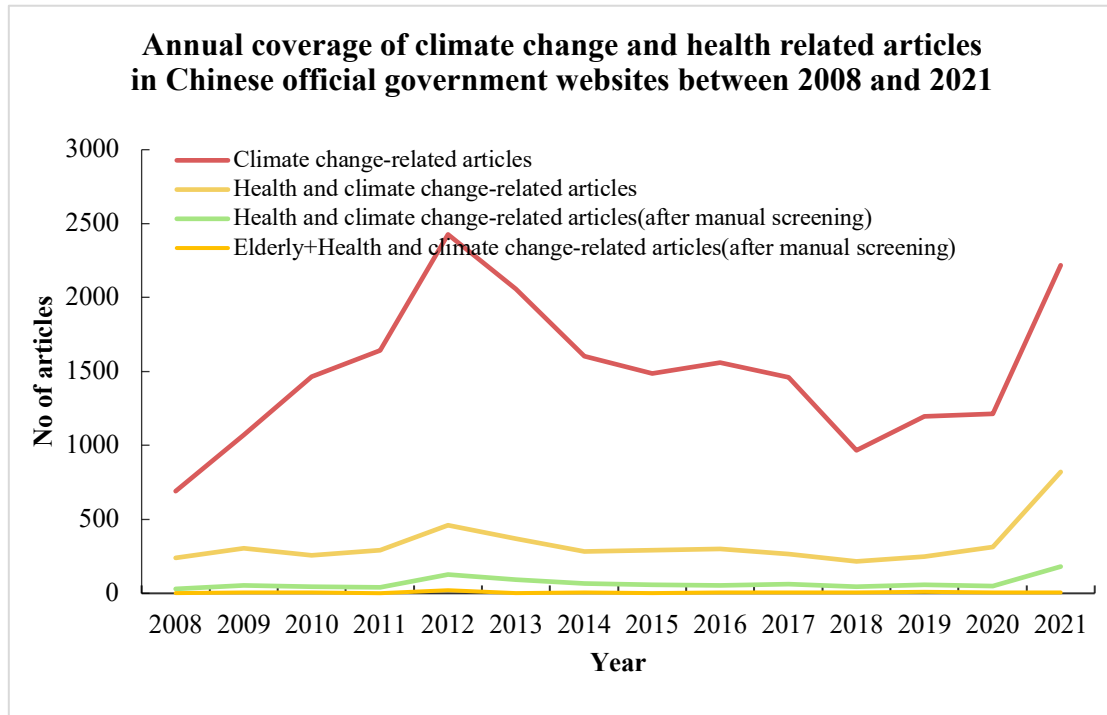

3064

3065

3066 **Figure 61:** Coverage of climate change and climate change-health-elderly mentioned together (after  
3067 manual screening) on Chinese government websites between 2008 and 2021.

3068

3069

**Data**

3070

3071

3072

3073

3074

3075

Across the 2008-2021 period, there was an average of 1504 articles per year discussing climate change, in which about 4.5% or 68 articles (after manual screening) per year were related to human health. It is clear that there is a rising trend in the year of 2021, which is 1.83 times higher in the data of climate change and 3.7 times higher in the data of health and climate change compared with last year. The number of elderly in health and climate change range from 1 to 21, the average articles is 6 per year.

3076

**Caveats**

3077

3078

Some articles may be omitted because the key words were limited.

3079

**Future Form of Indicator**

3080

3081

3082

In order to further improve the accuracy and relevance of the research samples, keywords can be adjusted according to the Chinese context in the future.

3083 **Additional information to Figure 2 in the**  
 3084 **main text**

3085 **Table 63: Description of indicators used in Figure 2**

| Indicator                               | Baseline period | Latest year |
|-----------------------------------------|-----------------|-------------|
| Heatwave-related mortality              | 1986-2005       | 2021        |
| Change in labor capacity                | 1986-2005       | 2021        |
| Heat and physical activities            | 1986-2005       | 2021        |
| Wildfire exposure                       | 2001-2005       | 2021        |
| Population exposure to extreme rainfall | 1986-2005       | 2020        |
| Population exposure to drought          | 1986-2005       | 2020        |
| Climate suitability to dengue fever     | 2001-2004       | 2020        |

3086

3087 **Additional information to Figure 3 in the**  
 3088 **main text**

3089 The standardization score for each impact indicator is calculated as:

3090 
$$yearly\ score = \frac{year\ value}{baseline\ value}$$

3091 The parameters and latest original data used for each indicator is provided in **Table 64**.

3092

3093 **Table 64: Description of impacts indicators used in Figure 3**

| Indicator                           | Meaning                                                                      | Baseline period | Baseline value | Latest year | Latest value |
|-------------------------------------|------------------------------------------------------------------------------|-----------------|----------------|-------------|--------------|
| Heatwave-related mortality          | The number of heatwave-related mortality in China                            | 1986-2005       | 11513.67       | 2021        | 24698.65     |
| Costs of heatwave-related mortality | The economic costs of heatwave-related mortality in China (million 2020 USD) | 2001-2005       | 6380.87        | 2021        | 9269.25      |
| Labor productivity loss             | The annual heat-related work hours loss in China (billion working hours)     | 1986-2005       | 30.86          | 2021        | 33.04        |
| Costs of                            | The economic costs                                                           | 2012-2016       | 170.817        | 2021        | 285.76       |

|                                         |                                                                         |           |          |      |          |
|-----------------------------------------|-------------------------------------------------------------------------|-----------|----------|------|----------|
| labor productivity loss                 | of heatwave-related labor productivity loss in China (billion 2020 USD) |           |          |      |          |
| Heat-related safe outdoor hours loss    | Loss of safe hours per person per day                                   | 1986-2005 | 1.38     | 2021 | 2.05     |
| Population exposure to extreme rainfall | Events per year                                                         | 1986-2005 | 98.915   | 2020 | 218.258  |
| Population exposure to drought          | Months per year                                                         | 1986-2005 | 995.569  | 2020 | 299.10   |
| Climate suitability for dengue fever    | VC                                                                      | 2004      | 0.25     | 2020 | 0.42     |
| Exposure of wildfire                    | Satellite-observed exposure (person-day)                                | 2001-2005 | 11825283 | 2021 | 19237914 |

3094

3095 The score for each response indicator is calculated as:

3096 
$$\text{yearly score} = \frac{\text{original data} - \text{worst case value}}{\text{target value} - \text{worst case value}}$$

3097 The parameters and latest original data used for each indicator is provided in **Table 65**.

3098

3099 **Table 65: Description of response indicators used in Figure 3**

| indicator                   | Original data                                              | worst case value | worst case year | target value | target meaning                            | Latest year | Original data in the latest year |
|-----------------------------|------------------------------------------------------------|------------------|-----------------|--------------|-------------------------------------------|-------------|----------------------------------|
| Health emergency management | National average health emergency score                    | 0                | \               | 100          | Full score in health emergency management | 2020        | 73                               |
| Adaptation planning         | Number of mainland provinces having health adaptation plan | 0                | \               | 31           | All provinces have adaptation planning    | 2020        | 6                                |

|                                  |                                                                                                          |          |      |       |                                                                                          |      |        |
|----------------------------------|----------------------------------------------------------------------------------------------------------|----------|------|-------|------------------------------------------------------------------------------------------|------|--------|
| Reduction of Carbon intensity    | Carbon Intensity                                                                                         | 1.22389  | 2005 | 0.630 | NDC targets: decreasing 65% from 2005's level                                            | 2021 | 0.984  |
| Coal phase-out                   | Share of Coal in TPES                                                                                    | 0.725    | 2007 | 0     | Total Coal Phase-out                                                                     | 2021 | 0.56   |
| Low-carbon electricity           | share of low-carbon electricity generation in total electricity generation                               | 0.147874 | 2007 | 1     | 100% Low-carbon electricity                                                              | 2021 | 0.277  |
| Clean household energy use       | Share of electricity in total household energy consumption                                               | 0.221352 | 2000 | 1     | 100% Electrification in household energy consumption                                     | 2018 | 0.4227 |
| Reduction of urban air pollution | Number of cities reaching WHO interm-1 target of PM <sub>2.5</sub> concentrations (10µg/m <sup>3</sup> ) | 0        | \    | 337   | Air qualities in all cities in China meet the WHO interm-1 target (35ug/m <sup>3</sup> ) | 2021 | 208    |
| Fossil Fuel Subsidies            | Fossil fuel subsidies value                                                                              | 50.94952 | 2018 | 0     | Zero fossil fuel subsidies                                                               | 2020 | 25.49  |

3100

3101



## 3102 Reference

3103

3104 1. Ma W, Chen R, Kan H. Temperature-related mortality in 17 large Chinese cities: how heat and  
3105 cold affect mortality in China. *Environ Res* 2014; **134**: 127-33.

3106 2. Yang J, Yin P, Sun J, et al. Heatwave and mortality in 31 major Chinese cities: Definition,  
3107 vulnerability and implications. *Sci Total Environ* 2019; **649**: 695-702.

3108 3. Huang C, Barnett A. Human impacts: Winter weather and health. *Nature Climate Change*  
3109 2014; **4**(3): 173-4.

3110 4. Vaidyanathan A, Malilay J, Schramm P, Saha S. Heat-Related Deaths - United States, 2004-  
3111 2018. *MMWR Morb Mortal Wkly Rep* 2020; **69**(24): 729-34.

3112 5. Chen R, Yin P, Wang L, et al. Association between ambient temperature and mortality risk  
3113 and burden: time series study in 272 main Chinese cities. *BMJ* 2018: k4306.

3114 6. Service(C3S) CCC. ERA5: Fifth generation of ECMWF atmospheric reanalyses of the global  
3115 climate. Copernicus Climate Change Service Climate Data Store (CDS).

3116 7. Chambers J. Hybrid gridded demographic data for the world, 1950-2020. 1.0 ed. Zenodo;  
3117 2020.

3118 8. Xu Z, FitzGerald G, Guo Y, Jalaludin B, Tong S. Impact of heatwave on mortality under different  
3119 heatwave definitions: A systematic review and meta-analysis. *Environ Int* 2016; **89-90**: 193-203.

3120 9. Cai W, Zhang C, Suen HP, et al. The 2020 China report of the Lancet Countdown on health  
3121 and climate change. *The Lancet Public Health* 2021; **6**(1): e64-e81.

3122 10. Kjellstrom T, Freyberg C, Lemke B, Otto M, Briggs D. Estimating population heat exposure  
3123 and impacts on working people in conjunction with climate change. *Int J Biometeorol* 2018; **62**(3):  
3124 291-306.

3125 11. Romanello M, McGushin A, Di Napoli C, et al. The 2021 report of the Lancet Countdown on  
3126 health and climate change: code red for a healthy future. *Lancet* 2021; **398**(10311): 1619-62.

3127 12. Steadman RG. The Assessment of Sultriness. Part I: A Temperature-Humidity Index Based on  
3128 Human Physiology and Clothing Science. *Journal of Applied Meteorology and Climatology* 1979;  
3129 **18**(7): 861-73.

3130 13. Heat Stroke Expert Group of the Whole Army ECGoDaToHS. Expert Consensus on Emergency  
3131 Diagnosis and Treatment of Heat Stroke. *Chinese Journal of Emergency Medicine* 2021; **11**(30):  
3132 1290-9.

3133 14. SMA. Hot Weather Guidelines. Australia: Sports Medicine Australia, 2017.

3134 15. Liu Z, Gao S, Chen Y, Cai W. Hybrid gridded demographic data for China, 1979-2100. Zenodo;  
3135 2021.

3136 16. Li X, Gong P, Zhou Y, et al. Mapping global urban boundaries from the global artificial  
3137 impervious area (GAIA) data. *Environmental Research Letters* 2020; **15**(9).

3138 17. Giglio L, Boschetti L, Roy DP, Humber ML, Justice CO. The Collection 6 MODIS burned area  
3139 mapping algorithm and product. *Remote Sens Environ* 2018; **217**: 72-85.

3140 18. Vitolo C, Di Giuseppe F, Barnard C, et al. ERA5-based global meteorological wildfire danger  
3141 maps. *Sci Data* 2020; **7**(1): 216.

3142 19. Cai W, Zhang C, Zhang S, et al. The 2021 China report of the Lancet Countdown on health  
3143 and climate change: seizing the window of opportunity. *The Lancet Public Health* 2021; **6**(12):

3144 e932-e47.

3145 20. Watts N, Amann M, Arnell N, et al. The 2020 report of the Lancet Countdown on health and  
3146 climate change: responding to converging crises. *The Lancet* 2021; **397**(10269): 129-70.

3147 21. Watts N, Amann M, Arnell N, et al. The 2018 report of the Lancet Countdown on health and  
3148 climate change: shaping the health of nations for centuries to come. *Lancet* 2018; **392**(10163):  
3149 2479-514.

3150 22. Watts N, Amann M, Arnell N, et al. The 2019 report of The Lancet Countdown on health and  
3151 climate change: ensuring that the health of a child born today is not defined by a changing climate.  
3152 *The Lancet* 2019; **394**(10211).

3153 23. RASE D. Frequency analysis of rainfall data. *College on Soil Physics - 30th Anniversary (1983-*  
3154 *2013)* 2013.

3155 24. Zarch MAA, Sivakumar B, Sharma A. Droughts in a warming climate: A global assessment of  
3156 Standardized precipitation index (SPI) and Reconnaissance drought index (RDI). *Journal of*  
3157 *Hydrology* 2015; **526**: 183-95.

3158 25. Xu Y, Gao X, Shen Y, Xu C, Shi Y, Giorgi F. A daily temperature dataset over China and its  
3159 application in validating a RCM simulation. *Advances in Atmospheric Sciences* 2009; **26**(4): 763-  
3160 72.

3161 26. Wu J, Gao X. A gridded daily observation dataset over China region and comparison with the  
3162 other datasets. *Chinese Journal of Geophysics* 2013; **56**(04): 1102-11.

3163 27. Rocklöv J, Tozan Y. Climate change and the rising infectiousness of dengue. *Emerging Topics*  
3164 *in Life Sciences* 2019; **3**(2).

3165 28. Jing L-H, Hans S, Annelies W-S, Joacim R. Vectorial capacity of *Aedes aegypti*: effects of  
3166 temperature and implications for global dengue epidemic potential. *PloS one* 2014; **9**(3).

3167 29. Murray CJ. Quantifying the burden of disease: the technical basis for disability-adjusted life  
3168 years. *Bulletin of the World health Organization* 1994; **72**(3): 429.

3169 30. Anderson KB, Chunsuttiwat S, Nisalak A, et al. Burden of symptomatic dengue infection in  
3170 children at primary school in Thailand: a prospective study. *The Lancet* 2007; **369**(9571): 1452-9.

3171 31. Shepard DS, Undurraga EA, Halasa YA. Economic and disease burden of dengue in Southeast  
3172 Asia. *PLoS Negl Trop Dis* 2013; **7**(2): e2055.

3173 32. Chinese Association of Infectious Diseases CAoTDaP, Chinese Association of Traditional  
3174 Chinese Medicine. Guidelines for clinical diagnosis and treatment of dengue fever in China.  
3175 *Chinese Journal of Clinical Infectious Diseases*, **11**(5): 321.

3176 33. Wu J GX. A set of daily observations of Chinese grid data and comparison with other data [J].  
3177 *Earth and Planetary Physics* 2013; **56**(04): 1102-11.

3178 34. JC F. Impact of climate change on dengue fever and its adaptability. *Chinese Center for*  
3179 *Disease Control and Prevention* 2013.

3180 35. WHO. The IHR core capacity scores 2019. [https://www.who.int/data/gho/indicator-](https://www.who.int/data/gho/indicator-metadata-registry/imr-details/4672)  
3181 [metadata-registry/imr-details/4672](https://www.who.int/data/gho/indicator-metadata-registry/imr-details/4672) (accessed May 23 2020).

3182 36. Wu HT WC, Liao KJ, Li B, Xu Z. Health emergency management capabilities of health  
3183 administrative sectors in China. *Chin J Public Health* 2020; **36**(1): 50-5.

3184 37. Fox-Kemper B, H.T. Hewitt, C. Xiao, G. Aðalgeirsdóttir, S.S. Drijfhout, T.L. Edwards, N.R.  
3185 Gollledge, M. Hemer, R.E. Kopp, G. Krinner, A. Mix, D. Notz, S. Nowicki, I.S. Nurhati, L. Ruiz, J.-B.  
3186 Sallée, A.B.A. Slangen, and Y. Yu, . Ocean, Cryosphere and Sea Level Change. In: Masson-Delmotte  
3187 V, P. Zhai, A. Pirani, S.L. Connors, C. Péan, S. Berger, N. Caud, Y. Chen, L. Goldfarb, M.I. Gomis, M.

3188 Huang, K. Leitzell, E. Lonnoy, J.B.R. Matthews, T.K. Maycock, T. Waterfield, O. Yelekçi, R. Yu, and B.  
3189 Zhou ed. *Climate Change 2021: The Physical Science Basis Contribution of Working Group I to the*  
3190 *Sixth Assessment Report of the Intergovernmental Panel on Climate Change*. Cambridge, United  
3191 Kingdom and New York, NY, USA: Cambridge University Press; 2021.

3192 38. Garner GG, T. Hermans, R. E. Kopp, A. B. A. Slangen, T. L. Edwards, A. Levermann, S. Nowicki,  
3193 M. D. Palmer, C. Smith, B. Fox-Kemper, H. T. Hewitt, C. Xiao, G. Aðalgeirsdóttir, S. S. Drijfhout, T. L.  
3194 Edwards, N. R. Golledge, M. Hemer, R. E. Kopp, G. Krinner, A. Mix, D. Notz, S. Nowicki, I. S. Nurhati,  
3195 L. Ruiz, J-B. Sallée, Y. Yu, L. Hua, T. Palmer, B. Pearson. IPCC AR6 Sea-Level Rise Projections. Version  
3196 20210809. In: PO.DAAC, editor. CA, USA; 2021.

3197 39. Kulp SAS, B. H. CoastalDEM: A global coastal digital elevation model improved from SRTM  
3198 using a neural network. *Remote Sensing of Environment* 2018; **206**: 231-9.

3199 40. Doxsey-Whitfield E. Taking Advantage of the Improved Availability of Census Data: A First  
3200 Look at the Gridded Population of the World, Version 4. *Papers in Applied Geography* 2015 2015;  
3201 **1**: 226-34.

3202 41. Ning J. The 2020 Population Census of China: Office of the Leading Group of the State  
3203 Council for the Seventh National Population Census, 2021.

3204 42. State Council Information Office. China's Policies and Actions on Climate Change. 2021.  
3205 [http://www.gov.cn/zhengce/2021-10/27/content\\_5646697.htm](http://www.gov.cn/zhengce/2021-10/27/content_5646697.htm).

3206 43. Ministry of Ecology and Environment of the People's Republic of China, National Climate  
3207 Change Adaptation Strategy 2035 (in Chinese). 2022.

3208 44. National Health Commission of the People's Republic of China and fourteen other ministries,  
3209 The 14th Five-Year Plan on Healthy Ageing (in Chinese). 2022.

3210 45. Qin D. *Climate and Environmental Evolution in China: 2021*: Science Press; 2021.

3211 46. CDP. Annual Cities Survey Data. London, UK; 2021.

3212 47. MEE. The People's Republic of China Third National Communication on Climate Change.  
3213 Beijing, China: Ministry of Ecology and Environment of People's Republic of China; 2018.

3214 48. Regional Climate Change Assessment. 2014.  
3215 [http://zwgk.cma.gov.cn/2011xzt/2014zt/20140116/2014011607/201410/t20141017\\_264273.html](http://zwgk.cma.gov.cn/2011xzt/2014zt/20140116/2014011607/201410/t20141017_264273.html).

3216 49. Liu M. Central China Regional Climate Change Assessment Report: 2020. *Meteorological*  
3217 *Monthly* 2022.

3218 50. Congress SCotNPs. Law of the People's Republic of China on the Prevention and Treatment  
3219 of Infectious Diseases. Beijing, China; 2013.

3220 51. NBSC. National Bureau of Statistics of China, China Statistical Yearbook 2019. Beijing: China  
3221 Statistics Press; 2019.

3222 52. China MoHaU-RDoPsRo. China Urban and Rural Construction Statistical Yearbook 2018.  
3223 Beijing: China Statistics Press; 2018.

3224 53. State Information Center of China CIA. China Information Almanac 2017. Beijing: China  
3225 Information Almanac Periodical Press; 2017.

3226 54. China NHCoPsRo. China Health Statistics Yearbook 2019. Beijing: China Union Medical  
3227 University Press; 2019.

3228 55. Department of Industry Statistics NBoSoC. China Industry Statistical Yearbook 2017. Beijing:  
3229 China Statistics Press; 2017.

3230 56. Rojas-Rueda D, Nieuwenhuijsen MJ, Gascon M, Perez-Leon D, Mudu P. Green spaces and  
3231 mortality: a systematic review and meta-analysis of cohort studies. *The Lancet Planetary Health*

- 3232 2019; **3**(11): e469-e77.
- 3233 57. Didan K. MOD13Q1 MODIS/Terra Vegetation Indices 16-Day L3 Global 250m SIN Grid V006.  
3234 In: DAAC NELP, editor.; 2015.
- 3235 58. Center for International Earth Science Information Network - CIESIN - Columbia University,  
3236 International Food Policy Research Institute - IFPRI, The World Bank, Centro Internacional de  
3237 Agricultura Tropical - CIAT. Global Rural-Urban Mapping Project, Version 1 (GRUMPv1): Urban  
3238 Extent Polygons, Revision 02. Palisades, New York: NASA Socioeconomic Data and Applications  
3239 Center (SEDAC); 2021.
- 3240 59. Center for International Earth Science Information Network -Columbia University, CUNY  
3241 Institute fir Demographic Research, Institute IFP, World Bank, Tropical CIdA. Global Rural Urban  
3242 Mapping Project, Version 1 (GRUMPv1): Urban Extent Polygons, Revision 01. NASA Socioeconomic  
3243 Data and Applications Center (SEDAC) Palisades, NY, USA; 2017.
- 3244 60. NASA Socioeconomic Data and Applications Center (SEDAC) Gridded Population of the  
3245 World (GPWv4). 2021. <https://beta.sedac.ciesin.columbia.edu/data/collection/gpw-v4>.
- 3246 61. The Inter-Sectoral Impact Model Intercomparison Project (ISIMP). Input data set: Historical,  
3247 gridded population. 2021. [https://www.isimip.org/gettingstarted/input-data-bias-  
3248 correction/details/31/](https://www.isimip.org/gettingstarted/input-data-bias-correction/details/31/).
- 3249 62. Balk DL, Deichmann U, Yetman G, Pozzi F, Hay SI, Nelson A. Determining global population  
3250 distribution: methods, applications and data. *Advances in parasitology* 2006; **62**: 119-56.
- 3251 63. Shan Y, Guan D, Zheng H, et al. China CO2 emission accounts 1997–2015. *Scientific data* 2018;  
3252 **5**(1): 1-14.
- 3253 64. Guan Y, Shan Y, Huang Q, Chen H, Wang D, Hubacek K. Assessment to China's recent  
3254 emission pattern shifts. *Earth's Future* 2021; **9**(11): e2021EF002241.
- 3255 65. Shan Y, Huang Q, Guan D, Hubacek K. China CO2 emission accounts 2016–2017. *Scientific  
3256 data* 2020; **7**(1): 1-9.
- 3257 66. Shan Y, Liu J, Liu Z, et al. New provincial CO2 emission inventories in China based on apparent  
3258 energy consumption data and updated emission factors. *Applied Energy* 2016; **184**: 742-50.
- 3259 67. NBSC. China Energy Statistical Yearbook Beijing: China Statistics Press; 2001-2020.
- 3260 68. NBSC. China Energy Statistical Yearbook 2020-2021. Beijing: China Statistics Press, 2021-  
3261 2022.
- 3262 69. National Data. *National Bureau of Statistics of China* 2022;  
3263 <http://data.stats.gov.cn/english/>(Accessed 2022.03.15).
- 3264 70. NBSC. China Energy Statistical Yearbook 2010-2019. Beijing: Beijing: China Statistics Press,  
3265 2011-2020.
- 3266 71. China Electricity Council. 2021 National Electric Power Industry Statistical Express, 2022.
- 3267 72. NBSC. China Energy Statistical Yearbook 2020-2021. Beijing: China Statistics Press; 2021-  
3268 2022.
- 3269 73. China Electricity Council, 2022. 2021 National Electric Power Industry Statistical  
3270 Express,<https://www.cec.org.cn/detail/index.html?3-306014>.
- 3271 74. NBSC. China Energy Statistical Yearbook 2010-2019. Beijing: China Statistics Press; 2011-  
3272 2020. .
- 3273 75. IHME. Global Burden of Disease Study (GBD) 2019. <http://ghdx.healthdata.org/gbd-2019>  
3274 (accessed 28 Feb 2022).
- 3275 76. Wang J, Zhou Z, Zhao J, Zheng J, Guan Z. Towards a cleaner domestic heating sector in China:

3276 Current situations, implementation strategies, and supporting measures. *Applied Thermal*  
3277 *Engineering* 2019; **152**: 515-31.

3278 77. Liu J, Hou B, Ma X-W, Liao H. Solid fuel use for cooking and its health effects on the elderly  
3279 in rural China. *Environmental Science and Pollution Research* 2018; **25**(4): 3669-80.

3280 78. Saenz JL, Adar SD, Zhang YS, et al. Household use of polluting cooking fuels and late-life  
3281 cognitive function: A harmonized analysis of India, Mexico, and China. *Environment International*  
3282 2021; **156**: 106722.

3283 79. Hou B, Liao H, Wang J-W, Wang F, Zhang H. Cooking fuel decision-making and family  
3284 structure: a field study in China. *Environmental Science and Pollution Research* 2019; **26**(23):  
3285 24050-61.

3286 80. Data Center of Ministry of Ecology and Environment of China. Daily air quality of Chinese  
3287 cities. <https://datacenter.mee.gov.cn/websjzx/queryIndex.vm> (accessed March 18th 2021).

3288 81. Amann M, Kiesewetter G, Schöpp W, et al. Reducing global air pollution: the scope for further  
3289 policy interventions. *Philosophical Transactions of the Royal Society A* 2020; **378**(2183): 20190331.

3290 82. IEA. World Energy Outlook 2021. 2022. [https://www.iea.org/reports/world-energy-outlook-](https://www.iea.org/reports/world-energy-outlook-2021)  
3291 [2021](https://www.iea.org/reports/world-energy-outlook-2021)

3292 83. Simpson D, Benedictow A, Berge H, et al. The EMEP MSC-W chemical transport model—  
3293 technical description. *Atmospheric Chemistry and Physics* 2012; **12**(16): 7825-65.

3294 84. IHME. Global Burden of Disease Collaborative Network. Particulate Matter Risk Curves. Seattle:  
3295 Institute for Health Metrics and Evaluation (IHME), 2021. 2021. [http://ghdx.healthdata.org/gbd-](http://ghdx.healthdata.org/gbd-2019)  
3296 [2019](http://ghdx.healthdata.org/gbd-2019) (accessed 2022.04.28).

3297 85. National Bureau of Statistics of China. China Statistical Yearbook 2021. Beijing, China: China  
3298 Statistics Press; 2021.

3299 86. MEE. Guide for Emission Inventory of Air Pollutants from On-Road Vehicles.  
3300 <https://www.mee.gov.cn/gkml/hbb/bgg/201501/W020150107594587831090.pdf>.

3301 87. Grigoratos T, Fontaras G, Giechaskiel B, Zacharof N. Real world emissions performance of  
3302 heavy-duty Euro VI diesel vehicles. *Atmospheric Environment* 2019; **201**: 348-59.

3303 88. Zhang Z, Man H, Zhao J, et al. Primary organic gas emissions in vehicle cold start events:  
3304 Rates, compositions and temperature effects. *Journal of Hazardous Materials* 2022; **435**: 128979.

3305 89. Luo Z, Wang Y, Lv Z, et al. Impacts of vehicle emission on air quality and human health in  
3306 China. *Science of The Total Environment* 2022; **813**: 152655.

3307 90. He X, Jiang S. Effects of vehicle purchase restrictions on urban air quality: Empirical study on  
3308 cities in China. *Energy Policy* 2021; **148**: 112001.

3309 91. Raghutla C, Shahbaz M, Chittedi KR, Jiao Z. Financing clean energy projects: New empirical  
3310 evidence from major investment countries. *Renewable Energy* 2021; **169**: 231-41.

3311 92. Tan R, Tang D, Lin B. Policy impact of new energy vehicles promotion on air quality in Chinese  
3312 cities. *Energy Policy* 2018; **118**: 33-40.

3313 93. MEE. China Mobile Source Environmental Management Annual Report. 2021.

3314 94. Partridge I, Gamkhar SJEi. A methodology for estimating health benefits of electricity  
3315 generation using renewable technologies. 2012; **39**(1): 103-10.

3316 95. CEADs. China Multi-Regional Input-Output Table 2017. 2022.  
3317 [https://www.ceads.net/data/input\\_output\\_tables/](https://www.ceads.net/data/input_output_tables/) (accessed March 11 2022).

3318 96. Hallegatte S. Modeling the Role of Inventories and Heterogeneity in the Assessment of the  
3319 Economic Costs of Natural Disasters. *Risk Analysis* 2014; **34**(1): 152-67.

- 3320 97. Hallegatte S. An Adaptive Regional Input-Output Model and its Application to the  
3321 Assessment of the Economic Cost of Katrina. *Risk Analysis* 2008; **28**(3): 779-99.
- 3322 98. National Bureau of Statistics of China. Input-Output Tables. 2021.  
3323 <https://data.stats.gov.cn/ifnormal.htm?u=/files/html/quickSearch/trcc/trcc01.html&h=740>.
- 3324 99. CEADs. China Multi-Regional Input-Output Table 2017. 2021.  
3325 [https://www.ceads.net/data/input\\_output\\_tables/](https://www.ceads.net/data/input_output_tables/).
- 3326 100. National Bureau of Statistics of China. China' s 2021 Statistical Bulletin on National  
3327 Economics and Social Development. 2022. [http://www.gov.cn/xinwen/2022-](http://www.gov.cn/xinwen/2022-02/28/content_5676015.htm)  
3328 [02/28/content\\_5676015.htm](http://www.gov.cn/xinwen/2022-02/28/content_5676015.htm) (accessed Mar. 8 2022).
- 3329 101. National Bureau of Statistics of China. Tabulation on the 2010 population census of the  
3330 People's Republic of China. Beijing, China: China Statistics Press; 2010.
- 3331 102. Hu Y, Yang L, Guan D. The Economic Impact of "Natural Disaster - Public Health" Major  
3332 Compound Extreme Events: A Case Study of the Compound Event of Floods and COVID Outbreak  
3333 in Zhengzhou China. *China Journal of Econometrics* 2022; **2**(2).
- 3334 103. Guan D, Wang D, Hallegatte S, et al. Global supply-chain effects of COVID-19 control  
3335 measures. *Nature Human Behaviour* 2020; **4**(6): 577-87.
- 3336 104. National Bureau of Statistics of China, Ministry of Ecology and Environment of China. China  
3337 Statistical Yearbook on Environment 2020. Beijing, China: China Statistics Press; 2021.
- 3338 105. Ministry of Emergency Management of China. Basic Situation of National Natural Disasters in  
3339 2020. 2021. [https://www.mem.gov.cn/xw/yjglbgzdt/202101/t20210108\\_376745.shtml](https://www.mem.gov.cn/xw/yjglbgzdt/202101/t20210108_376745.shtml) (accessed  
3340 Mar. 11 2022).
- 3341 106. Ministry of Emergency Management of China. Basic Situation of National Natural Disasters in  
3342 2021. 2022. [https://www.mem.gov.cn/xw/yjglbgzdt/202201/t20220123\\_407204.shtml](https://www.mem.gov.cn/xw/yjglbgzdt/202201/t20220123_407204.shtml) (accessed  
3343 Mar. 11 2022).
- 3344 107. Yin Z, Hu Y, Jenkins K, et al. Assessing the economic impacts of future fluvial flooding in six  
3345 countries under climate change and socio-economic development. *Climatic Change* 2021; **166**(3):  
3346 38.
- 3347 108. Zhengda Flood Disaster Action Group. Simulation of the whole process of the 720 Zhengzhou  
3348 rainstorm. 2021. <https://mp.weixin.qq.com/s/5VY04fbD3VCynSantxtABg> (accessed Mar. 11 2022).
- 3349 109. DaHe Fortune Cube. Zhengzhou's 2021 GDP announced: 4.7% growth. 2022.  
3350 <http://henan.sina.com.cn/news/2022-01-27/detail-ikyakumy2850378.shtml> (accessed Mar. 11  
3351 2022).
- 3352 110. Henan Government. GDP of Henan province reached 5888.741 billion yuan with an increase  
3353 of 6.3%. 2022. <https://www.henan.gov.cn/2022/01-21/2386306.html> (accessed Mar. 11 2022).
- 3354 111. 2022 WICLS. Wind Economic Database 2021.; 2022.
- 3355 112. Industry NP, Statistics. National Energy Administration 2022 first quarter online press  
3356 conference transcript. 2022.
- 3357 113. Statistics CNBo. National Data 2021. 2022.
- 3358 114. IRENA. Renewable Energy and Jobs – Annual Review 2021. *International Renewable Energy*  
3359 *Agency* 2021; (Abu Dhabi).
- 3360 115. CEIC. China Employment in Fossil Fuel Extraction *CEIC Global Economic Data, Indicators,*  
3361 *Charts & Forecasts [Online]* 2012-2020; Available at: [https://www.ceicdata.com/zh-](https://www.ceicdata.com/zh-hans/china/no-of-employee-by-industry-monthly/no-of-employee-petroleum-coking--nuclear-fuel)  
3362 [hans/china/no-of-employee-by-industry-monthly/no-of-employee-petroleum-coking--](https://www.ceicdata.com/zh-hans/china/no-of-employee-by-industry-monthly/no-of-employee-petroleum-coking--nuclear-fuel)  
3363 [nuclear-fuel](https://www.ceicdata.com/zh-hans/china/no-of-employee-by-industry-monthly/no-of-employee-petroleum-coking--nuclear-fuel); [https://www.ceicdata.com/zh-hans/china/no-of-employee-by-industry-](https://www.ceicdata.com/zh-hans/china/no-of-employee-by-industry-monthly/no-of-employee-petroleum-coking--nuclear-fuel)



3364 [monthly/no-of-employee-coal-mining--dressing](#) [Accessed 2022.03.11].

3365 116. IEA. Fossil Fuel Subsidies Database. Paris: International Energy Agency; 2022.

3366 117. Beggs PJ, Zhang YJTMjoA. The MJA-Lancet Countdown on health and climate change:  
3367 Australian policy inaction threatens lives(Summary). 2018; **209**(11): 474-5.

3368 118. Gavin NT. Addressing climate change: a media perspective. *Environmental Politics* 2009; **18**:  
3369 765-80.

3370 119. Boykoff MT. Media and scientific communication: a case of climate change. *Geological Society,*  
3371 *London, Special Publications* 2008; **305**(1): 11-8.

3372 120. Boykoff MT. Who speaks for the climate? Making sense of media reporting on climate change.:  
3373 Cambridge: Cambridge University Press; 2011.

3374 121. Barkemeyer R, Figge F, Hoepner A, Holt D, Kraak JM, Yu P-S. Media coverage of climate  
3375 change: An international comparison. *Environment and Planning C: Politics and Space* 2017; **35**(6):  
3376 1029-54.

3377 122. StatCounter. Search Engine Market Share China. 2021. [https://gs.statcounter.com/search-](https://gs.statcounter.com/search-engine-market-share/all/china#monthly-202101-202112)  
3378 [engine-market-share/all/china#monthly-202101-202112](https://gs.statcounter.com/search-engine-market-share/all/china#monthly-202101-202112) (accessed 2022/03/22 2022).

3379 123. Protection DoRCaE. Working Guidance for Carbon Dioxide Peaking and Carbon Neutrality in  
3380 Full and Faithful Implementation of the New Development Philosophy. Oct.24, 2021.  
3381 [https://en.ndrc.gov.cn/policies/202110/t20211024\\_1300725.html](https://en.ndrc.gov.cn/policies/202110/t20211024_1300725.html) (accessed 2022/03/22 2022).

3382 124. Protection DoRCaE. Action Plan for Carbon Dioxide Peaking Before 2030. Oct.27, 2021.  
3383 [https://en.ndrc.gov.cn/policies/202110/t20211027\\_1301020.html](https://en.ndrc.gov.cn/policies/202110/t20211027_1301020.html) (accessed 2022/03/22 2022).

3384
